# Supplementary material for: Asymmetric Synthesis of Trifluoroethyl-Based, Chiral 3-Benzyloxy-1- and -2-Phenyl-quinazolinones of Biomedicinal Interest by Radical Type Cross-Coupling to Olefins
Source: MDPI journal article supplement (doi:10.3390/ijms24010513), 2022-12-28

**Asymmetric Synthesis of Trifluoroethyl-based, Chiral 3-Benzoxo-1- and -2-Phenyl-quinazolinones of Biomedical Interests by Radical Type Cross Coupling to Olefins**

Chien-Tien Chen,\*<sup>1</sup> Yu-Chang Chang,<sup>1</sup> Pin-Xuan Tseng,<sup>1</sup> Chien-I Lein,<sup>1</sup> Shiang-Fu Hung,<sup>1</sup> and Hsyueh-Liang Wu\*<sup>2</sup>

<sup>1</sup>Department of Chemistry, National Tsing Hua University, Taiwan, ROC

<sup>2</sup>Department of Chemistry, National Taiwan Normal University, Taiwan, ROC

e-mail: ctchen@mx.nthu.edu.tw<sup>1</sup>; hlw@ntnu.edu.tw<sup>2</sup>

**Supporting Information**

Table of content

|                                                                                                        |         |
|--------------------------------------------------------------------------------------------------------|---------|
| Preparation of radical trapping agents <b>1-3</b> .....                                                | S2-S5   |
| Preparation of radical trapping agents <b>4-7</b> .....                                                | S5-S10  |
| Representative catalytic procedures, Characterization Data, and HPLC plots for <b>8-10</b> ... ..      | S11-S18 |
| Procedures, Characterization Data, and HPLC plots for <b>11-14</b> .....                               | S18-S31 |
| Ortep drawings and selected X-ray data for ( <i>R</i> )- <b>12a</b> and ( <i>R</i> )- <b>13a</b> ..... | S31-S33 |
| EGFR-TK inhibition results.....                                                                        | S33-S35 |
| Experimental References.....                                                                           | S35-S36 |
| Computational details and Cartesian coordinates.....                                                   | S37-S73 |
| Scanned spectra.....                                                                                   | S74-S97 |

## Experimental procedures for the preparation of 3-hydroxyquinazolin(di)ones as radical trapping agents

### 2-Amino-*N*-(benzyloxy)benzamide<sup>1a</sup>

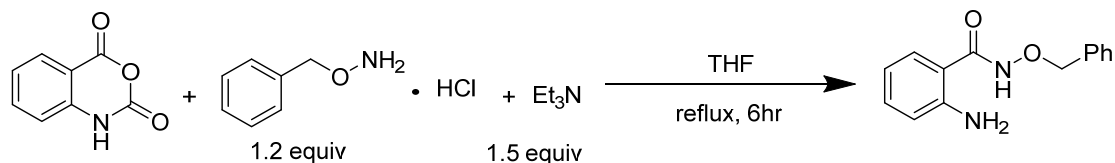

In a 100-mL three-necked flask was placed *N*-carboxyaminobenzenecarboxylic anhydride (1.63 g, 10.0 mmol) and *O*-benzylhydroxylamine hydrochloride (1.93 g, 12.0 mmol, 1.2 equiv) in anhydrous THF (20 mL). Triethylamine (2.1 mL, 15.0 mmol, 1.5 equiv) was then added. The resulting mixture was stirred under reflux for 18 h and the quenched with sat. aqueous  $\text{NH}_4\text{Cl}$  solution (20 mL) at ambient temperature. The reaction mixture was extracted with ethyl acetate (20 mL  $\times$  3). The combined organic layer was dried over  $\text{MgSO}_4$  (1.5 g), filtered, and evaporated. The crude product was purified by column chromatography on silica gel (ethyl acetate/hexanes, 1/3) to obtain 1.99 g (82% yield) of 2-amino-*N*-(benzyloxy)benzamide:  $^1\text{H}$  NMR (400 MHz,  $\text{DMSO-d}_6$ )  $\delta$  11.44 (s, 1H), 7.48-7.30 (m, 6H), 7.16 (td,  $J = 7.8, 1.4$  Hz, 1H), 6.73 (dd,  $J = 8.2, 1.0$  Hz), 6.49 (td,  $J = 7.8, 1.0$  Hz), 6.30 (s, 2H), 4.90 (s, 2H);  $^{13}\text{C}$  NMR (100 MHz,  $\text{DMSO-d}_6$ )  $\delta$  167.7, 150.1, 136.6, 132.6, 129.3, 128.8, 128.7, 128.2, 116.8, 115.1, 112.8, 77.4; TLC  $R_f$  0.25 (EtOAc/hexanes, 1/3); HRMS (FD)  $[\text{M}]^+$  Calcd for  $\text{C}_{14}\text{H}_{14}\text{N}_2\text{O}_2$ : 242.1050, found: 242.1051.

### 3-Hydroxyquinazolin-4(3H)-one **1**<sup>1a,b</sup>

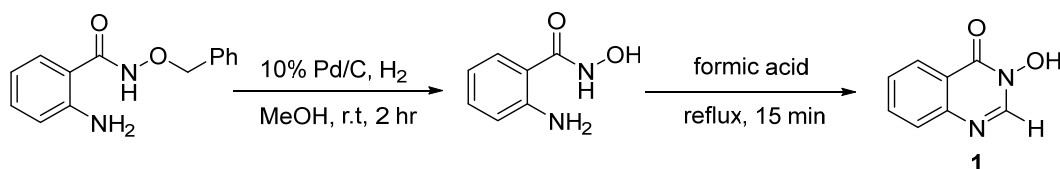

To a 100-mL double-necked flask was placed 2-amino-*N*-(benzyloxy)benzamide (1.34 g, 5.5 mmol) in methanol (50 mL). Ten percent Pd/C catalyst (52.3 mg) was then added. The reaction mixture was degassed with argon and then introduced hydrogen gas for 2 min. The reaction flask was kept

under a hydrogen gas balloon at ambient temperature for 2 h with stirring with complete reaction as evidenced by TLC analysis. The reaction mixture was passed through a short plug of Celite and the filtrate was concentrated under reduced pressure to provide 743.2 mg of crude 2-amino-*N*-hydroxybenzamide. The crude product was placed in a 25-mL double-necked flask in formic acid (3 mL). The reaction mixture was stirred under reflux for 15 min. Deionized water (15 mL) was then added and the reaction mixture was kept boiling for another 15 min and gradually cooled to ambient temperature to induce precipitation of the product. The solid was collected by filtration through a sintered glass funnel and rinsed with deionized water (20 mL). The wet crude product was recrystallized from acetone. (30 mL) to give 394.6 mg of **1** in 44% yield:  $^1\text{H}$  NMR (400 MHz, DMSO- $d_6$ )  $\delta$  11.91 (s, 1H), 8.54 (s, 1H), 8.18 (d,  $J$  = 8.0 Hz, 1H), 7.83 (td,  $J$  = 8.2, 1.2 Hz, 1H), 7.72 (d,  $J$  = 8.2 Hz, 1H), 7.57 (td,  $J$  = 8.0, 1.2 Hz, 1H);  $^{13}\text{C}$  NMR (100 MHz, DMSO- $d_6$ )  $\delta$  157.3, 146.9, 145.9, 134.0, 127.5, 127.0, 125.9, 122.5; TLC  $R_f$  0.19 (Hexanes/EtOAc, 1/3); HRMS (FI)  $[\text{M}]^+$  Calcd for  $\text{C}_8\text{H}_6\text{N}_2\text{O}_2$ : 162.0424, found: 162.0425.

### 3-(Benzyloxy)-2-phenyl-quinazolin-4(3H)-one<sup>2</sup>

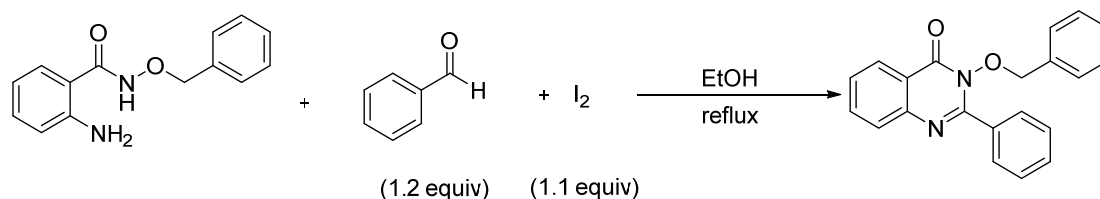

In a 100-mL three-necked flask was placed 2-amino-*N*-benzyloxy-benzamide (2.18 g, 9.0 mmol) and dissolve it in ethanol (30 mL). Iodine (2.51 g, 9.9 mmol, 1.1 equiv) was added and benzaldehyde (1.1 mL, 10.8 mmol, 1.2 equiv) was injected. The reaction mixture was stirred at ambient temperature for 2 h and then quenched by adding sat. aqueous sodium thiosulfate (9 mL). The reaction mixture was extracted with ethyl acetate (25 mL $\times$ 3). The combined organic layer dried over  $\text{MgSO}_4$  (1.5 g), filtered, and evaporated. The crude residue was purified by column chromatography on silica gel

(EtOAc/hexanes, 1/8) to give 1.48 g (50% yield) of 3-(benzyloxy)-2-phenylquinazolin-4(3H)-one:  $^1\text{H}$  NMR (400 MHz, DMSO- $d_6$ )  $\delta$  8.25 (dd,  $J = 7.9$ , Hz, 1H), 7.90 (t,  $J = 7.6$  Hz, 1H), 7.76 (d,  $J = 7.3$  Hz, 3H), 7.62 (q,  $J = 6.8$  Hz, 2H), 7.53 (t,  $J = 7.7$  Hz, 2H), 7.32 (t,  $J = 7.2$  Hz, 1H), 7.25 (t,  $J = 7.4$  Hz, 2H), 6.94 (d,  $J = 7.4$  Hz, 2H), 4.93 (s, 2H);  $^{13}\text{C}$  NMR (100 MHz, DMSO- $d_6$ )  $\delta$  157.3, 153.7, 146.1, 134.6, 133.1, 132.3, 130.4, 129.5, 129.3, 129.0, 128.3, 127.9, 127.7, 127.1, 126.2, 122.4, 77.7; TLC  $R_f$  0.17 (EtOAc/hexanes, 1/8); HRMS (FD)  $[\text{M}]^+$  Calcd for  $\text{C}_{21}\text{H}_{16}\text{N}_2\text{O}_2$ : 328.1217, found: 328.1226.

### 3-Hydroxy-2-phenyl-quinazolin-4(3H)-one **2**<sup>3</sup>

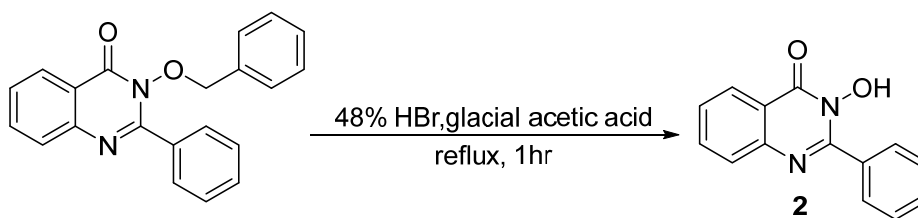

In a 100-mL double-necked flask was placed 3-(benzyloxy)-2-phenylquinazolin-4(3H)-one (328.4 mg, 1.0 mmol) in glacial acetic acid (2 mL). The reaction was heated to reflux with stirring for 3 min to reach a homogeneous state and 48% hydrobromic acid (2 mL) was added. After having been stirred for 1 h, the reaction mixture was cooled to ambient temperature. Deionized water (20 mL) was added to quench the reaction and to induce precipitation of the product. The solid was collected by passing thru a sintered glass and the rinsed with deionized water (30 mL). The resulting wet crude product was recrystallized from acetone (10 mL) to obtain 162.0 mg (68%) of **2** as a white solid:  $^1\text{H}$  NMR (400 MHz, DMSO- $d_6$ )  $\delta$  11.67 (s, 1H) 8.20 (dd,  $J = 8.0, 1.1$  Hz, 1H), 7.87-7.81 (m, 3H), 7.74 (d,  $J = 8.0$  Hz, 1H), 7.60-7.47 (m, 4H);  $^{13}\text{C}$  NMR (100 MHz, DMSO- $d_6$ )  $\delta$  158.3, 153.3, 146.2, 134.2, 132.8, 130.3, 129.4, 127.9, 127.5, 126.8, 125.9, 121.4; TLC  $R_f$  0.77 (EtOAc/hexanes, 1/1); HRMS (FD)  $[\text{M}]^+$  Calcd for  $\text{C}_{14}\text{H}_{10}\text{N}_2\text{O}_2$ : 238.0748, found: 238.0741.

### 3-Hydroxy-2-(methylthio)quinazolin-4(3H)-one **3**<sup>4</sup>

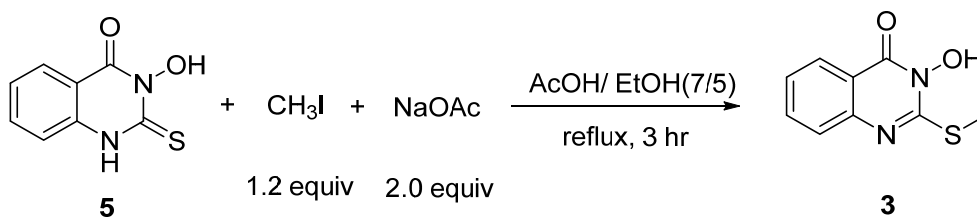

To a 50-mL double-necked flask was placed **5** (972.3 mg, 5.0 mmol) and anhydrous sodium acetate (828.2 mg, 10.0 mmol, 2.0 equiv) in glacial acetic acid/ethanol (7/5) mixed solvent (12 mL). The reaction mixture was heated to reflux till completely homogeneous and then returned to ambient temperature. Iodomethane (382.2  $\mu$ L, 6.0 mmol, 1.2 equiv) was added and the resulting reaction mixture was stirred under reflux for 3 h. The reaction mixture was gradually cooled to ambient temperature and concentrated to remove EtOH by rotatory evaporation. Deionized water (30 mL) was added to induce product precipitation. The crude product was washed with deionized water (30 mL) and the wet solid was recrystallized from acetone (40 mL) to give 994.2 mg (96% yield) of **3** as a white solid:  $^1\text{H}$  NMR (400 MHz, DMSO- $d_6$ )  $\delta$  12.11 (s, 1H), 8.08 (d,  $J$  = 7.6 Hz, 1H), 7.78 (t,  $J$  = 7.6 Hz, 1H), 7.59 (d,  $J$  = 8.2 Hz, 1H), 7.45 (t,  $J$  = 7.6 Hz, 1H), 2.52 (s, 3H);  $^{13}\text{C}$  NMR (100 MHz, DMSO- $d_6$ )  $\delta$  157.8, 157.3, 146.3, 134.2, 126.1, 126.1, 125.5, 119.9, 13.2; TLC  $R_f$  0.38 (MeOH/EtOAc, 1/10); HRMS (FD)  $[\text{M}]^+$  Calcd for  $\text{C}_9\text{H}_8\text{N}_2\text{O}_2\text{S}$ : 208.0301, found: 208.0303.

### 3-(Benzyloxy)quinazoline-2,4(1H,3H)-dione<sup>2</sup>

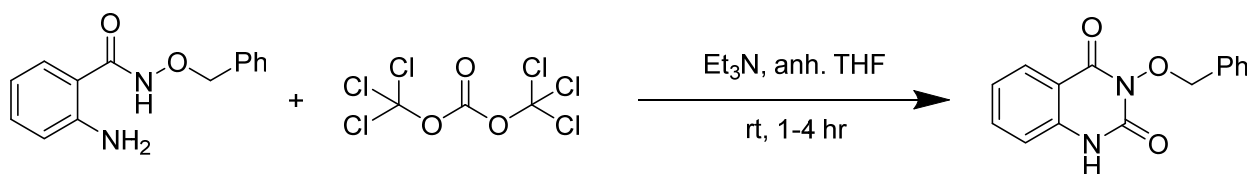

In a 50-mL, two-necked, round-bottomed flask was placed 2-amino-*N*-benzyloxy-benzamide (726.8 mg, 3.0 mmol) and triphosgene (356.1mg, 1.2 mmol, 0.4 equiv) in anhydrous tetrahydrofuran (30 mL). Triethylamine (1.04 mL, 7.5 mol, 2.5 equiv) was added dropwise. The resulting reaction mixture was stirred at ambient temperature for 1h and then quenched with  $\text{H}_2\text{O}$  (80 mL). The resulting

white solid was collected and then washed consecutively with H<sub>2</sub>O (2 × 250 mL) and acetone (50 mL). The wet solid was dried under vacuum to give 579.5 mg (72% yield) of ***N*-Bn-QuizOn** as a white solid: <sup>1</sup>H NMR (400 MHz, d<sub>6</sub>-DMSO) δ 11.66 (s, 1H), 7.96 (d, *J* = 7.8 Hz, 1H), 7.68 (t, *J* = 7.8 Hz, 1H), 7.57 (d, *J* = 6.6 Hz, 2H), 7.41 (d, *J* = 6.6 Hz, 3H), 7.26-7.20 (m, 2H), 5.10 (s, 2H); <sup>13</sup>C NMR (100 MHz, d<sub>6</sub>-DMSO) δ 159.0, 148.0, 138.7, 135.0, 134.5, 129.4, 128.8, 128.3, 127.2, 122.6, 115.4, 114.4, 77.5; *R*<sub>f</sub> 0.26 (EtOAc/hexanes, 1/2); HRMS (FD) Calcd for C<sub>15</sub>H<sub>12</sub>N<sub>2</sub>O<sub>3</sub>: 268.0842, found: 268.0846.

### 3-Hydroxyquinazoline-2,4(1H,3H)-dione **4**<sup>1a,3</sup>

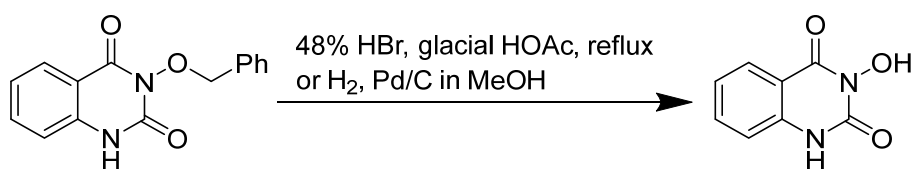

In a 25-mL, two-necked, round-bottomed flask was placed *N*-Bn-QuizOn (804.8 mg, 3.0 mmol) and hydrobromic acid (48%, 6 mL) in glacial acetic acid (6 mL). the resulting reaction mixture was heated to reflux for 4-5 h. The resulting solution was gradually cooled to ambient temperature and then quenched with water (50 mL). The resulting precipitate was collected by filtration and the solid was washed with water (10 mL). The wet solid was dried in vacuo and then recrystallized from MeOH (? mL) to give 272 mg (51% yield) of ***N*-OH-QuizOn** as a white solid:

In a 250-mL, round-bottomed flask was placed *N*-Bn-QuizOn (804.8 mg, 3.0 mmol) and Pd/C (10 wt% loading, 15.9 mg, 5 mol%) in MeOH (90 mL). The reaction flask was then topped with a H<sub>2</sub> gas balloon. After three cycles of rotavap. evacuation/H<sub>2</sub>-gas saturation, the reaction mixture was kept stirring under H<sub>2</sub> at ambient temperature for 1h. The reaction mixture was then passed through a shot plug of Celite (2.8 g) and the Celite pad was washed with MeOH (? mL). The combined filtrates were concentrated by rotary evaporation to give 375 mg (70% yield) of ***N*-OH-QuizOn** as a white solid: <sup>1</sup>H NMR (400 MHz, d<sub>6</sub>-DMSO) δ 11.55 (s, 1H), 10.58 (s, 1H), 7.94 (dd, *J* = 8.2, 1.0 Hz, 1H), 7.65 (td, *J*

= 7.8, 1.4 Hz, 1H), 7.24-7.18 (m, 2H);  $^{13}\text{C}$  NMR (100 MHz,  $\text{d}_6\text{-DMSO}$ )  $\delta$  159.4, 148.7, 138.3, 134.7, 127.1, 122.5, 115.3, 114.1;  $R_f$  0.33 ( $\text{CH}_3\text{OH}/\text{CH}_2\text{Cl}_2$ , 1/6).

***N*-(Benzyloxy)-2-(phenylamino)benzamide<sup>4a</sup>**

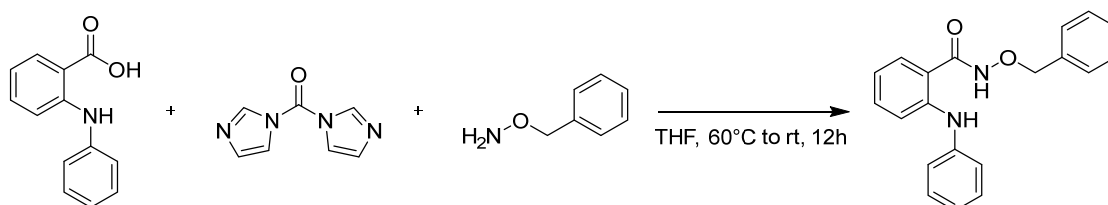

In a 100-mL double-necked bottle was placed Fenamic acid (2.1 g, 10 mmol) in anhydrous THF (15 mL) followed by addition of 1,1'-carbonyldiimidazole (1.8 g, 11 mL, 1.1 equiv). The reaction mixture was stirred at 60 °C for 20 min after which *O*-benzylhydroxylamine (1.5 g, 12 mmol, 1.2 equiv) was added through syringe. The reaction mixture was stirred at ambient temperature for 12 h and then concentrated. The resulting residue was treated with 1*N* aqueous hydrochloric acid (15 mL) and then extracted with ether (20 mL  $\times$  3). The combined organic layer was washed with sat. aqueous  $\text{NaHCO}_3$  (15 mL $\times$ 3), dried ( $\text{MgSO}_4$ ), filtered, evaporated. The crude product was recrystallized from ether/*n*-hexane mixture to obtain 1.7 g (53% yield) of *N*-(Benzyloxy)-2-(phenylamino)benzamide:  $^1\text{H}$  NMR (400 MHz,  $\text{CDCl}_3$ ):  $\delta$  8.96 (s, 1H), 8.82 (s, 1H), 7.46-7.25 (m, 10H), 7.19 (s, 1H), 7.17 (s, 1H), 7.04 (t,  $J$  = 7.3 Hz, 1H), 6.70 (t,  $J$  = 7.5 Hz, 1H), 5.01 (s, 2H);  $^{13}\text{C}$  NMR (100 MHz,  $\text{CDCl}_3$ ):  $\delta$  168.3, 145.6, 141.2, 135.2, 132.7, 129.3, 128.7, 128.6, 127.5, 122.7, 120.9, 117.9, 115.5, 115.4, 78.4; TLC  $R_f$  0.30 (EtOAc/hexanes, 1/2); HRMS (ESI)  $[\text{M}+\text{Na}]^+$  Calcd for  $\text{C}_{20}\text{H}_{18}\text{N}_2\text{NaO}_2$ : 341.1266, found: 341.1267.

**3-(Benzyloxy)-1-phenylquinazoline-2,4(1H,3H)-dione<sup>4b</sup>**

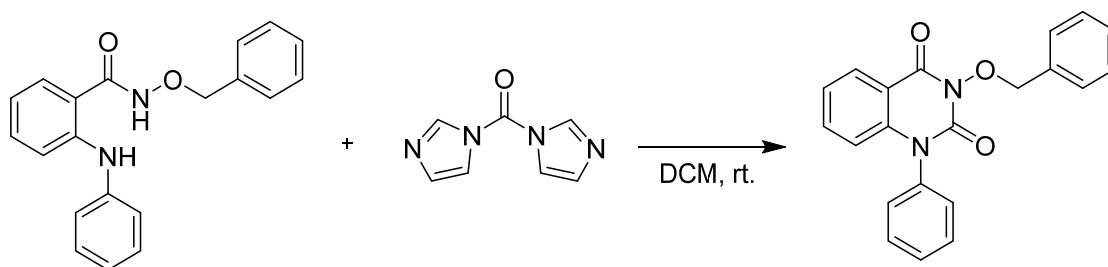

In a 250-mL flask was placed *N*-(benzyloxy)-2-(phenylamino)benzamide (2.2 g, 7.0 mmol) and 1,1'-carbonyldiimidazole (2.5 g, 14.0 mmol, 2.0 equiv) in CH<sub>2</sub>Cl<sub>2</sub> (70 mL). The reaction mixture was stirred at ambient temperature for 12 h. The mixture was concentrated to 30% of its original volume and then washed with aqueous 1*N* HCl solution (15 mL × 3). The remaining organic layer was concentrated by rotatory evaporation to give 1.89 g (yield 55%) of 3-(benzyloxy)-1-phenylquinazoline-2,4(1*H*,3*H*)-dione: <sup>1</sup>H NMR (400 MHz, CDCl<sub>3</sub>): δ 8.14 (dd, *J* = 7.8, 1.3 Hz, 1*H*), 7.67-7.40 (m, 11*H*), 7.33 (t, *J* = 7.3 Hz, 1*H*), 6.47 (d, *J* = 8.4 Hz, 1*H*), 5.16 (s, 2*H*); <sup>13</sup>C NMR (100 MHz, CDCl<sub>3</sub>): δ 158.5, 148.2, 140.9, 136.2, 135.0, 134.4, 130.2, 129.5, 129.3, 128.9, 128.4, 127.6, 123.1, 115.4, 115.1, 77.5; TLC *R<sub>f</sub>* 0.11 (EtOAc/hexanes, 1/2); HRMS (ESI) [M+Na]<sup>+</sup> Calcd for C<sub>21</sub>H<sub>16</sub>N<sub>2</sub>NaO<sub>3</sub>: 367.1059, found: 367.1059.

### 3-Hydroxy-1-phenylquinazoline-2,4(1*H*,3*H*)-dione **5**<sup>3</sup>

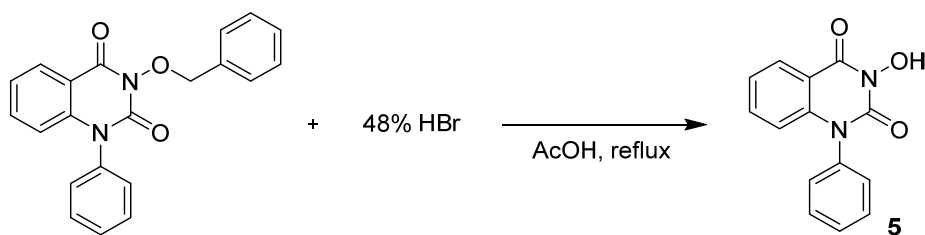

In a 100-mL double-necked flask was placed 3-(benzyloxy)-1-phenylquinazoline-2,4(1*H*,3*H*)-dione (1.7 g, 5.0 mmol) in glacial acetic acid (10 mL). The mixture was heated till dissolution of the substrate and 48% hydrobromic acid (5.0 mL) was then added. After having been stirred under reflux for 2.5 h, the reaction mixture was quenched with deionized water (50 mL) to induce precipitation of the product out. The collected solid was sequentially washed with deionized water (30 mL × 3) and *n*-hexane (30 mL × 3), and then dried under vacuum to obtain 720 mg (57% yield) of **5** as a white solid: <sup>1</sup>H NMR (400 MHz, DMSO-*d*<sub>6</sub>): δ 10.85 (s, 1*H*), δ 8.10 (dd, *J* = 6.6, 1.3 Hz, 1*H*), δ 7.65-7.56 (m, 2*H*), δ 7.48-7.46 (m, 2*H*), δ 7.29 (t, *J* = 7.5 Hz, 1*H*), δ 6.44 (d, *J* = 8.4 Hz, 1*H*); <sup>13</sup>C NMR (100 MHz, DMSO-*d*<sub>6</sub>): δ 158.8, 149.0, 140.5, 136.4, 134.7, 130.2, 129.3, 127.5, 123.0, 115.3, 114.8; TLC *R<sub>f</sub>* 0.61 (EtOAc/hexanes, 1/1); HRMS (ESI) [M+Na]<sup>+</sup> Calcd for C<sub>14</sub>H<sub>10</sub>N<sub>2</sub>NaO<sub>3</sub>: 277.0589, found: 277.0587.



### 1-Benzyl-3-(benzyloxy)quinazoline-2,4(1H,3H)-dione **6-Bn**<sup>5</sup>

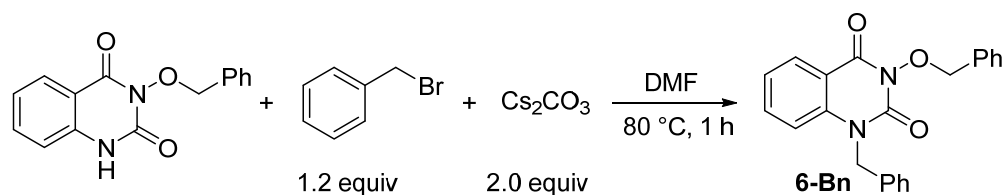

In a 50-mL double-necked flask was placed 3-(benzyloxy)quinazoline-2,4(1H,3H)-dione (537.8 mg, 2.0 mmol) in *N,N*-dimethylformamide (DMF, 10 mL). Cesium carbonate (1321.4 mg, 4.0 mmol, 2.0 equiv) and benzyl bromide (286.3  $\mu$ L, 1.2 mmol, 1.2 equiv) were added. After having been stirred at 80 °C for 1 h, the reaction was quenched with deionized water (30 mL) at ambient temperature. A copious amount of white solid was formed. The mixture was filtered through a suction funnel and the solid was rinsed with deionized water (30 mL). The collected solid was re-dissolved in acetone (40 mL) and concentrated by rotatory evaporation to remove acetone and the remaining DMF to obtain 586.9 mg (82% yield) of **6-Bn** as a white solid: <sup>1</sup>H NMR (400 MHz, CDCl<sub>3</sub>)  $\delta$  8.26 (dd, *J* = 7.8, 1.4 Hz 1H), 7.65-7.63 (m, 2H), 7.55 (td, *J* = 8.4, 1.6 Hz, 1H), 7.40-7.38 (m, 3H), 7.35-7.31 (m, 2H), 7.29 (m, 1H), 7.26-7.19 (m, 3H), 7.11 (d, *J* = 8.4 Hz, 1H), 5.37 (s, 2H), 5.29 (s, 2H); <sup>13</sup>C NMR (100 MHz, CDCl<sub>3</sub>)  $\delta$  158.7, 149.6, 139.2, 135.2, 133.7, 130.2, 129.1, 129.0, 128.9, 128.4, 127.8, 126.5, 123.4, 115.9, 114.7, 78.4, 47.4; TLC *R*<sub>f</sub> 0.48 (EtOAc/hexanes, 1/1); HRMS (ESI) [M+Na]<sup>+</sup> Calcd for C<sub>22</sub>H<sub>18</sub>N<sub>2</sub>O<sub>3</sub>Na: 381.1215, found: 381.1209.

### 1-Benzyl-3-hydroxyquinazoline-2,4(1H,3H)-dione **6**<sup>3</sup>

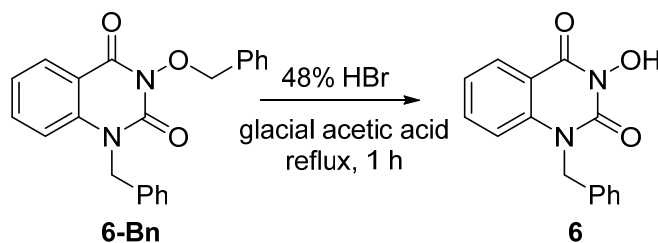

In a 25-mL two-necked flask was placed **6-Bn** (360.2 mg, 1.0 mmol) in glacial acetic acid (2 mL). The reaction mixture was heated to reflux in an oil bath and became homogeneous after 3 min. Hydrobromic acid (48%, 2 mL) was then added. After having been stirred for 1 h, the reaction

gradually cooled to ambient temperature. Deionized water (15 mL) was added to quench the reaction. The product precipitated out as a white solid. The solid was suction-filtered and washed with deionized water (30 mL). The wet solid was recrystallized from acetone (15 mL) to obtain 171.7 mg (64% yield) of **6**:  $^1\text{H}$  NMR (400 MHz, DMSO- $d_6$ )  $\delta$  10.86 (s, 1H), 8.08 (dd,  $J$  = 7.8, 1.2 Hz, 1H), 7.67 (t,  $J$  = 8.4, 1H), 7.35-7.26 (m, 7H), 5.39 (s, 2H);  $^{13}\text{C}$  NMR (100 MHz, DMSO- $d_6$ )  $\delta$  158.5, 149.8, 138.6, 136.1, 134.9, 128.7, 127.7, 127.3, 126.4, 123.1, 115.2, 115.1, 46.4; TLC  $R_f$  0.19 (hexanes/EtOAc, 1/2); HRMS (ESI)  $[\text{M}+\text{Na}]^+$  Calcd for  $\text{C}_{15}\text{H}_{12}\text{N}_2\text{O}_3+\text{Na}$ : 291.0746, found: 291.1070

### 3-Hydroxy-2-thioxo-2,3-dihydroquinazolin-4(1H)-one **7**<sup>6</sup>

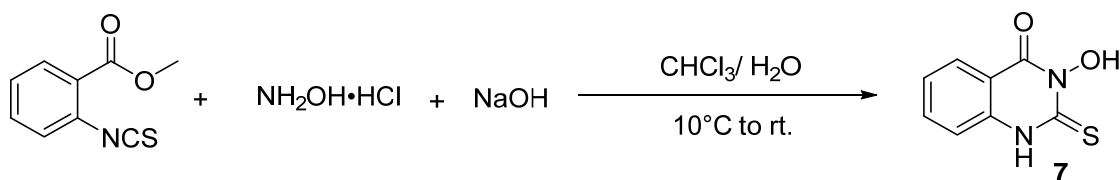

A solution of methyl 2-isothiocyanatobenzoate (956.3 mg, 5.0 mmol, 1.0 equiv) in chloroform (2 mL) was added at 5-10  $^\circ\text{C}$  to a stirred solution of  $\text{NH}_2\text{OH}\cdot\text{HCl}$  (384.5 mg, 5.5 mmol, 1.1 equiv) and  $\text{NaOH}$  (234 mg, 5.5 mmol, 1.1 equiv) in water (10 mL). After 20 minutes added chloroform (5 mL) and water (20 mL) to let reaction dissolved. The reaction mixture was stirred at room temperature for 2 h. The precipitate that formed was filtered off, washed with water (10 mL) and hexane (20 mL), and dried to give a colorless solid: 732.4 mg (76%)  $^1\text{H}$  NMR (400 MHz, DMSO- $d_6$ )  $\delta$  12.96 (s, 1H), 11.26 (s, 1H), 7.97 (d,  $J$  = 7.6 Hz, 1H), 7.73 (t,  $J$  = 7.2 Hz, 1H), 7.39 (d,  $J$  = 8.2 Hz, 1H), 7.33 (t,  $J$  = 7.6 Hz, 1H);  $^{13}\text{C}$  NMR (100 MHz, DMSO- $d_6$ )  $\delta$  172.7, 156.6, 138.7, 135.1, 127.0, 124.3, 115.9, 115.8;  $R_f$  0.22 (MeOH/ $\text{CH}_2\text{Cl}_2$ , 1/5); HRMS (ESI)  $[\text{M}+\text{Na}]^+$  Calcd for  $\text{C}_8\text{H}_6\text{N}_2\text{O}_2\text{S}+\text{Na}$ : 217.0048, found: 217.0061

## Representative catalytic procedure by V(O)-1

### (R)-3-(1-(3-Bromophenyl)-3,3,3-trifluoropropoxy)quinazolin-4(3H)-one **8a**

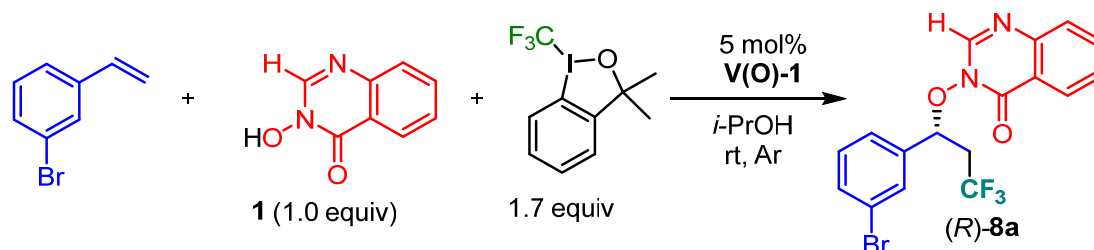

To an oven dried reaction tube (1.5 cm OD  $\times$  15.0 cm height) was placed **V(O)-1** (10.3 mg, 0.02 mmol, 5 mol%) and 2-H-Quiz **1** (65.3 mg, 0.4 mmol) in anhydrous *i*-PrOH (degassed by Ar, 2 mL) followed by addition of 3-bromo-styrene (52.7  $\mu$ L, 0.4 mmol, 1.0 equiv) thru a microsyringe under Ar atmosphere. A solution of Togni reagent (225.9 mg, 0.68 mmol, 1.7 equiv) in anhydrous *i*-PrOH (1+1 mL) was added. The resulting reaction mixture was stirred at ambient temperature for 68 h and was concentrated by rotatory evaporation. The crude mixture was purified by flash column chromatography (EtOAc/ hexanes, 1/4) on silica gel to give 127.2 mg (71% yield) of **8a** as a white solid:  $^1\text{H}$  NMR (400 MHz,  $\text{CDCl}_3$ )  $\delta$  8.31 (dd,  $J$  = 8.0, 1.4 Hz 1H), 7.75 (td,  $J$  = 7.6, 1.6 Hz, 1H), 7.64-7.62 (m, 2H), 7.55-7.50 (m, 3H), 7.30-7.23 (m, 2H), 5.76 (t,  $J$  = 6.6 Hz, 1H), 3.24-3.11 (m, 1H), 2.84-2.71 (m, 1H);  $^{13}\text{C}$  NMR (100 MHz,  $\text{CDCl}_3$ )  $\delta$  157.4, 146.6, 144.0, 137.7, 134.6, 133.6, 130.9, 130.8, 127.9, 127.6, 126.8, 124.7 (q,  $^1J_{\text{C-F}}$  = 275.3 Hz), 123.5, 123.3, 81.3, 39.0 (q,  $^2J_{\text{C-F}}$  = 29.5 Hz);  $^{19}\text{F}$  NMR (471 MHz,  $\text{CDCl}_3$ )  $\delta$  -62.96 (s, 3F); TLC  $R_f$  0.25 (EtOAc/Hexanes, 1/4); HRMS (FD)  $[\text{M}]^+$  Calcd for  $\text{C}_{17}\text{H}_{12}\text{F}_3\text{N}_2\text{O}_2\text{Br}$ : 412.0029, found: 412.0030; HPLC analysis from racemic product:  $t_R$  16.4 min (*S*), 19.5 min (*R*) (Chiralpak AS-H, *i*-PrOH/hexane, 5/95, 1.0 ml/min,  $\lambda$  = 254 nm); For the reaction catalyzed by **V(O)-1**:  $t_R$  16.2 min (minor, 18.4%), 18.9 min (major, 81.6%) for 63 % ee (*R*);  $[\alpha]_D^{30}$  +301.4 ( $c$  0.48,  $\text{CHCl}_3$ ) for 63% ee (*R*); For the reaction catalyzed by **V(O)-2** (51.1 mg, 31% yield):  $t_R$  25.4 min (major, 83.2%), 33.0 min (minor, 16.8%);  $[\alpha]_D^{29}$  -313.7 ( $c$  0.25,  $\text{CHCl}_3$ ) for 66 % ee (*S*); For racemic synthesis catalyzed by racemic **V(O)-1** in *i*-PrOH: 75% yield (134.3 mg, 68h).

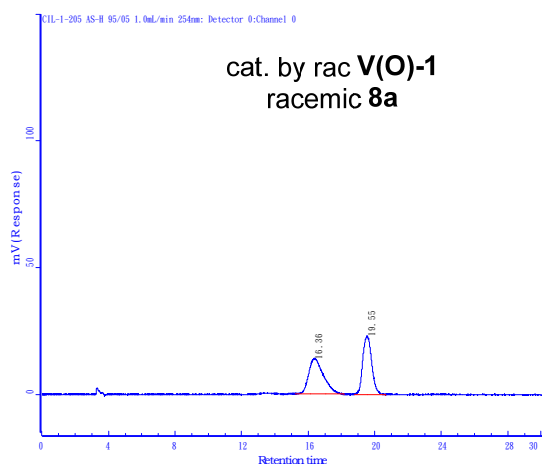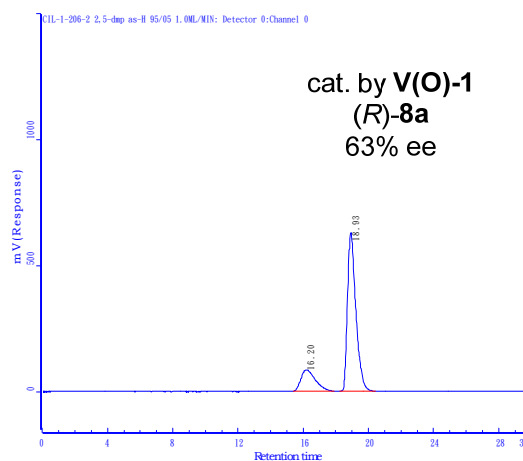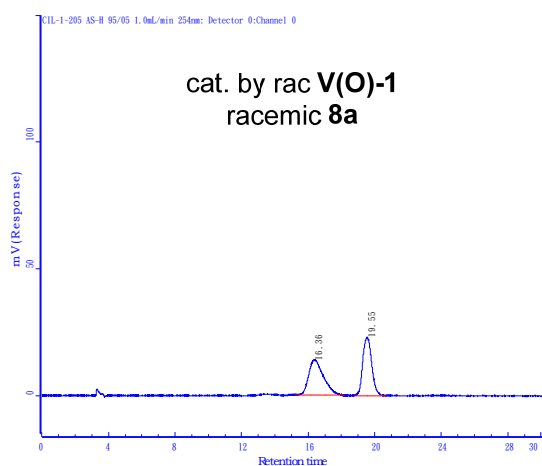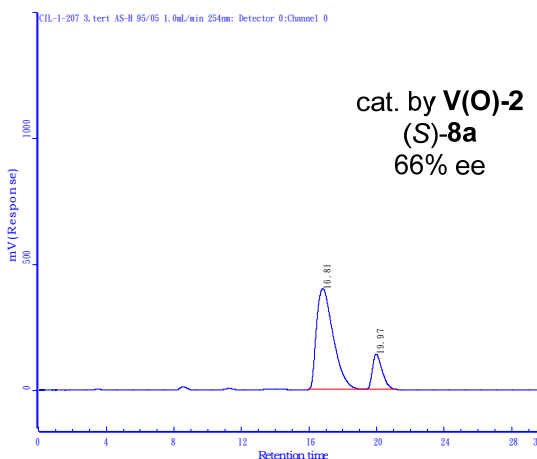

## Representative catalytic procedure by **V(O)-2**

### (*S*)-3-(1-(3-Bromophenyl)-3,3,3-trifluoropropoxy)-2-phenylquinazolin-4(3H)-one **9a**

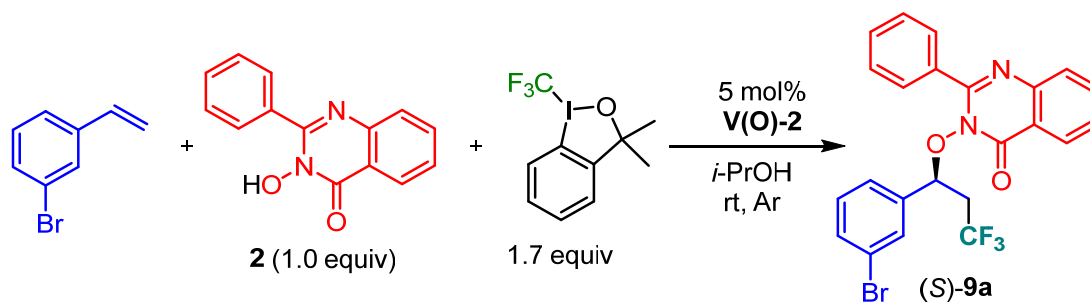

In an oven dried reaction tube (1.5 cm OD × 15.0 cm height) was placed **V(O)-2** (9.3 mg, 0.02

mmol, 5 mol%) and 2-Ph-Quiz **2** (95.5 mg, 0.4 mmol, 1.0 equiv) in anhydrous *i*-PrOH (degassed by Ar, 2 mL) followed by addition of 3-bromo-styrene (73  $\mu$ L, 0.56 mmol, 1.4 equiv) thru a microsyringe under Ar atmosphere. A solution of Togni reagent (224.6 mg, 0.68 mmol, 1.7 equiv) in anhydrous *i*-PrOH (1+1 mL) was added. The resulting reaction mixture was stirred at ambient temperature for 92 h and was concentrated by rotatory evaporation. The crude mixture was purified by flash column chromatography (EtOAc/ hexanes, 1/10) on silica gel to give 54.8 mg (28%) of (*S*)-**9a** as a white solid:  $^1\text{H}$  NMR (400 MHz,  $\text{CDCl}_3$ )  $\delta$  8.34 (dd,  $J$  = 8.0, 1.2 Hz, 1H), 7.77 (td,  $J$  = 7.6, 1.5 Hz, 1H), 7.70 (d,  $J$  = 7.9 Hz, 1H), 7.56-7.49 (m, 4H), 7.46-7.40 (m, 2H), 7.35 (d,  $J$  = 8.4 Hz, 1H), 6.94 (t,  $J$  = 7.9 Hz, 1H), 6.81-6.73 (m, 2H), 5.66 (t,  $J$  = 6.7 Hz, 1H), 3.10-2.91 (m, 1H), 2.67-2.49 (m, 1H);  $^{13}\text{C}$  NMR (100 MHz,  $\text{CDCl}_3$ )  $\delta$  158.3, 153.5, 146.3, 136.4, 134.6, 133.0, 132.3, 130.9, 130.7, 129.9, 129.6, 128.1, 128.0, 127.4, 127.1, 126.7, 124.7 (q,  $^1J_{\text{C-F}}$  = 277.2 Hz), 122.7, 122.1, 80.4, 38.1 (q,  $^2J_{\text{C-F}}$  = 29.6 Hz);  $^{19}\text{F}$  NMR (471 MHz,  $\text{CDCl}_3$ )  $\delta$  -63.01 (s, 3F); TLC  $R_f$  0.19 ( $\text{CH}_2\text{Cl}_2$ /Hexanes, 1/4); HRMS (FD)  $[\text{M}]^+$  Calcd for  $\text{C}_{23}\text{H}_{16}\text{F}_3\text{N}_2\text{O}_2\text{Br}$ : 488.0236, found: 488.0354; HPLC analysis from racemic product:  $t_R$  25.1 min (*S*), 32.6 min (*R*) (Chiralpak AS-H, *i*-PrOH/hexane, 1/99, 0.5 ml/min,  $\lambda$  = 254 nm); From the reaction catalyzed by **V(O)-2**:  $t_R$  25.4 min (major, 95.6%), 33.0 min (minor, 4.4%) for 91.2 % ee (*S*);  $[\alpha]_{\text{D}}^{22}$  +122.4 ( $c$  1.0,  $\text{CHCl}_3$ ) for 91% ee (*R*); From the reaction catalyzed by **V(O)-1** (88.1mg, 45% yield, 84h):  $t_R$  26.5 min (minor, 24.9%), 32.8 min (major, 75.1%) for 50 % ee (*R*); For racemic synthesis catalyzed by racemic **V(O)-1** in *i*-PrOH: 31% yield (60.7 mg, 92h).

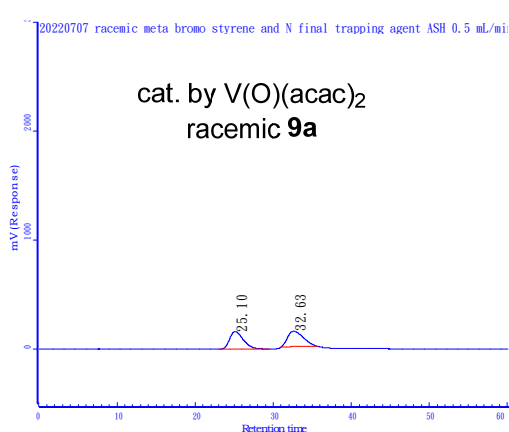

| # | Peak name | ax/min (min) | Area     | Area % | Assay % |
|---|-----------|--------------|----------|--------|---------|
| 0 |           | 25.103       | 19442.05 | 49.71  | 0.00    |
| 1 |           | 32.626       | 19671.63 | 50.29  | 0.00    |

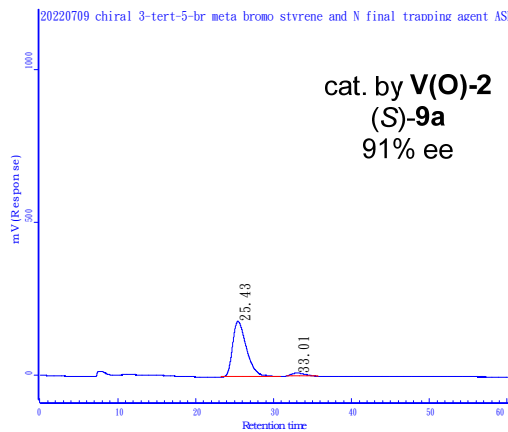

| # | Peak name | ax/min (min) | Area     | Area % | Assay % |
|---|-----------|--------------|----------|--------|---------|
| 0 |           | 25.434       | 22367.08 | 95.60  | 0.00    |
| 1 |           | 33.011       | 1029.88  | 4.40   | 0.00    |

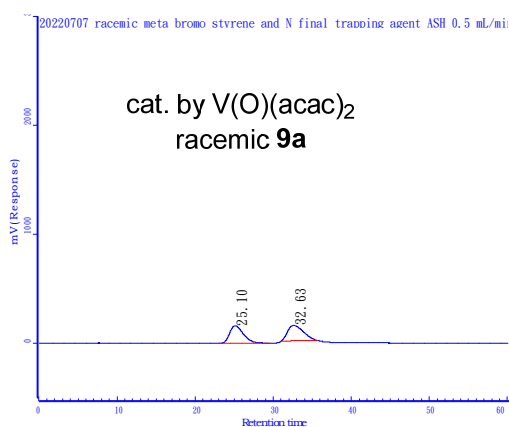

| # | Peak name | ax/min (min) | Area     | Area % | Assay % |
|---|-----------|--------------|----------|--------|---------|
| 0 |           | 25.103       | 19442.05 | 49.71  | 0.00    |
| 1 |           | 32.626       | 19671.63 | 50.29  | 0.00    |

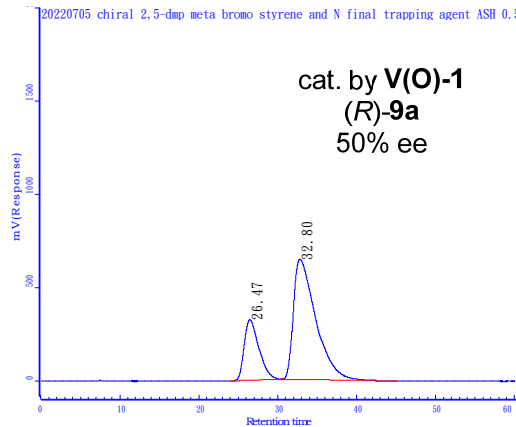

| # | Peak name | ax/min (min) | Area      | Area % | Assay % |
|---|-----------|--------------|-----------|--------|---------|
| 0 |           | 26.468       | 41803.19  | 24.88  | 0.00    |
| 1 |           | 32.804       | 126238.69 | 75.12  | 0.00    |

### (S)-2-Phenyl-3-(3,3,3-trifluoro-1-(*m*-tolyl)propoxy)quinazolin-4(3H)-one **9b**

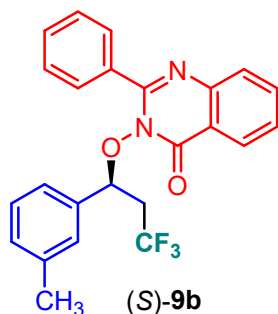

Data for **9b**: 61.5 mg, 31% yield, 108h: <sup>1</sup>H NMR (400 MHz, CDCl<sub>3</sub>) δ 8.34

(dd, *J* = 8.0, 1.3 Hz, 1H), 7.74 (td, *J* = 7.8, 1.4 Hz, 1H), 7.68 (d, *J* = 7.5 Hz,

1H), 7.54-7.45 (m, 4H), 7.40 (t, *J* = 7.8 Hz, 2H), 7.02 (d, *J* = 7.6 Hz, 1H),

6.93 (t, *J* = 7.6 Hz, 1H), 6.57 (d, *J* = 7.6 Hz, 1H), 6.47 (s, 1H), 5.72 (t, *J* =

6.7 Hz, 1H), 3.05-2.90 (m, 1H), 2.70-2.51 (m, 1H) 2.07 (s, 3H); <sup>13</sup>C NMR

(100 MHz, CDCl<sub>3</sub>) δ 158.4, 153.7, 146.3, 142.7, 138.1, 134.4, 133.9, 132.7, 130.6, 130.3, 129.8, 128.7,

128.2, 127.8, 126.9, 126.7, 125.9, 125.0 (q, <sup>1</sup>*J*<sub>C-F</sub> = 277.6 Hz), 122.1, 80.8, 38.0 (q, <sup>2</sup>*J*<sub>C-F</sub> = 29.3 Hz),

21.2; <sup>19</sup>F NMR (471 MHz, CDCl<sub>3</sub>) δ -63.15 (s, 3F); TLC R<sub>f</sub> 0.44 (EtOAc/Hexanes, 1/6); HRMS (FD)

$[M]^+$  Calcd for  $C_{24}H_{19}F_3N_2O_2$ : 424.14041, found: 424.14078; HPLC analysis from racemic product:  $t_R$  21.1 min (*S*), 24.8 min (*R*) (Chiralpak AS-H, *i*-PrOH/hexane, 1/99, 0.5 ml/min,  $\lambda = 254$  nm); From the reaction catalyzed by **V(O)-2**:  $t_R$  19.9 min (major, 93.8%), 23.3 min (minor, 6.2%);  $[\alpha]_D^{22} +111.5$  ( $c$  1.0,  $CHCl_3$ ) for 88% ee (*S*); From the reaction catalyzed by **V(O)-1** (118.2 mg, 60% yield, 70h):  $t_R$  21.1 min (minor, 27.3%), 24.6 min (major, 72.7%) for 45% ee (*R*).

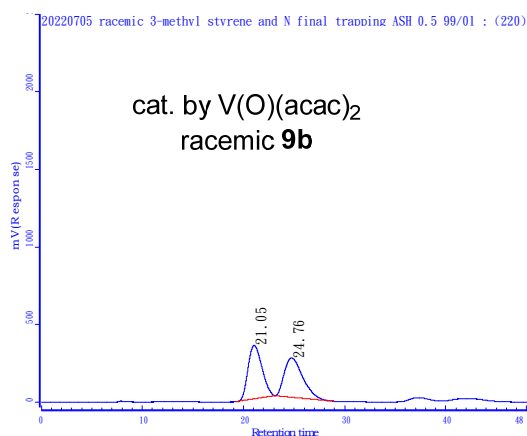

| # | Peak name | ax/min (min) | Area     | Area % | Assay % |
|---|-----------|--------------|----------|--------|---------|
| 0 |           | 21.051       | 32834.79 | 50.39  | 0.00    |
| 1 |           | 24.762       | 32321.23 | 49.61  | 0.00    |

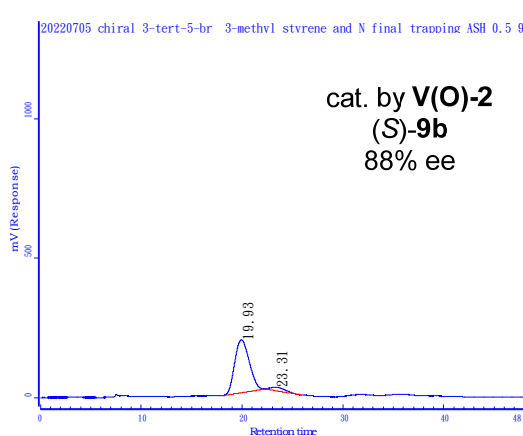

| # | Peak name | ax/min (min) | Area     | Area % | Assay % |
|---|-----------|--------------|----------|--------|---------|
| 0 |           | 19.932       | 19084.85 | 93.75  | 0.00    |
| 1 |           | 23.311       | 1273.37  | 6.25   | 0.00    |

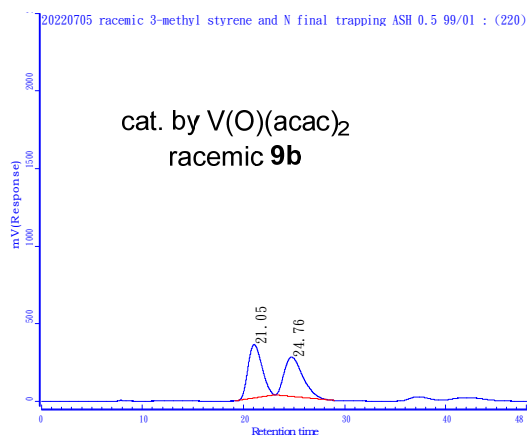

| # | Peak name | ax/min (min) | Area     | Area % | Assay % |
|---|-----------|--------------|----------|--------|---------|
| 0 |           | 21.051       | 32834.79 | 50.39  | 0.00    |
| 1 |           | 24.762       | 32321.23 | 49.61  | 0.00    |

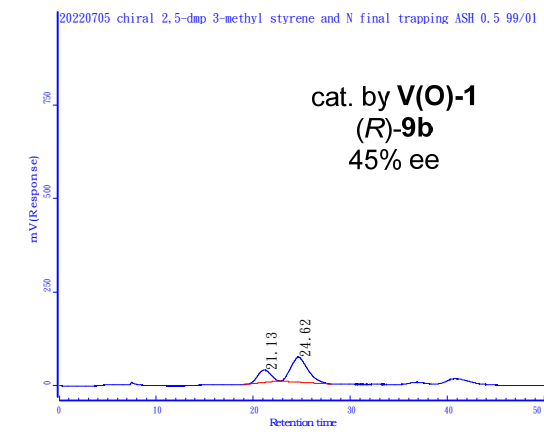

| # | Peak name | ax/min (min) | Area    | Area % | Assay % |
|---|-----------|--------------|---------|--------|---------|
| 0 |           | 21.128       | 3056.77 | 27.33  | 0.00    |
| 1 |           | 24.624       | 8129.88 | 72.67  | 0.00    |

**(*S*)-2-Phenyl-3-(3,3,3-trifluoro-1-(*p*-tolyl)propoxy)quinazolin-4(3H)-one 9c**

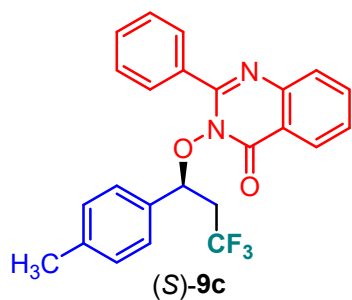

Data for **9c**: 107.3 mg, 55% yield, 92h:  $^1\text{H}$  NMR (400 MHz,  $\text{CDCl}_3$ )  $\delta$  8.33 (d,  $J = 7.8$  Hz, 1H), 7.74 (td,  $J = 7.7, 1.2$  Hz, 1H), 7.68 (d,  $J = 8.0$  Hz, 1H), 7.53-7.44 (m, 4H), 7.38 (t,  $J = 7.7$  Hz, 2H), 6.82 (d,  $J = 7.9$  Hz, 2H), 6.62 (d,  $J = 7.9$  Hz, 2H), 5.67 (t,  $J = 6.7$  Hz, 1H), 3.05-2.90 (m, 1H), 2.68-2.52 (m, 1H) 2.24 (s, 3H);  $^{13}\text{C}$  NMR (100 MHz,  $\text{CDCl}_3$ )  $\delta$  158.4, 153.7, 146.3, 139.7, 134.4, 132.7, 131.0, 130.3, 129.8, 129.1, 128.3, 127.9, 127.7, 126.9, 126.7, 125.0 (q,  $^1J_{\text{C-F}} = 277.4$  Hz), 122.2, 80.7, 38.0 (q,  $^2J_{\text{C-F}} = 29.8$  Hz), 21.2;  $^{19}\text{F}$  NMR (471 MHz,  $\text{CDCl}_3$ )  $\delta$  -63.10 (s, 3F); TLC  $R_f$  0.36 (EtOAc/Hexanes, 1/6); HRMS (FD)  $[\text{M}]^+$  Calcd for  $\text{C}_{24}\text{H}_{19}\text{F}_3\text{N}_2\text{O}_2$ : 424.14041, found: 424.14026; HPLC analysis from racemic product:  $t_R$  23.6 min (*S*), 31.4 min (*R*) (Chiralpak OJ-H, *i*-PrOH/hexane, 2.5/97.5, 0.5 ml/min,  $\lambda = 254$  nm); From the reaction catalyzed by **V(O)-2**:  $t_R$  19.9 min (major, 93.8%), 23.3 min (minor, 6.2%);  $[\alpha]_D^{22} +108.3$  ( $c$  1.0,  $\text{CHCl}_3$ ) for 85% ee (*S*); From the reaction catalyzed by **V(O)-1** (137.1 mg, 70% yield, 52h):  $t_R$  22.4 min (minor, 37.1%), 29.7 min (major, 62.9%) for 26% ee (*R*).

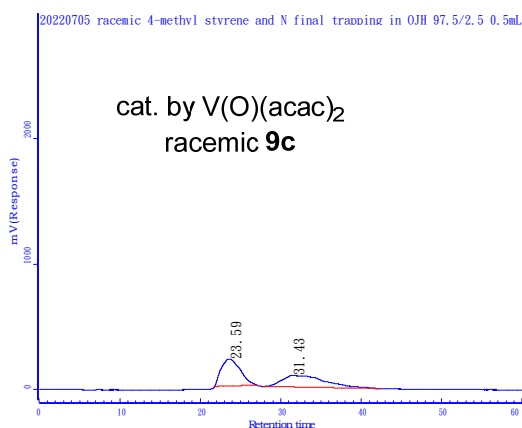

| # | Peak name | ax/min (min) | Area     | Area % | Assay % |
|---|-----------|--------------|----------|--------|---------|
| 0 |           | 23.588       | 35243.57 | 50.43  | 0.00    |
| 1 |           | 31.427       | 34638.60 | 49.57  | 0.00    |

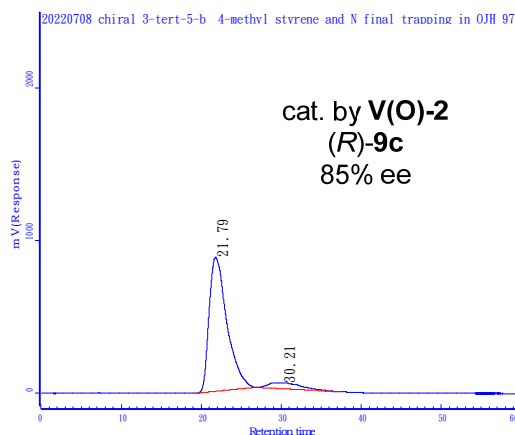

| # | Peak name | ax/min (min) | Area      | Area % | Assay % |
|---|-----------|--------------|-----------|--------|---------|
| 0 |           | 21.786       | 136480.56 | 92.57  | 0.00    |
| 1 |           | 30.214       | 10949.51  | 7.43   | 0.00    |



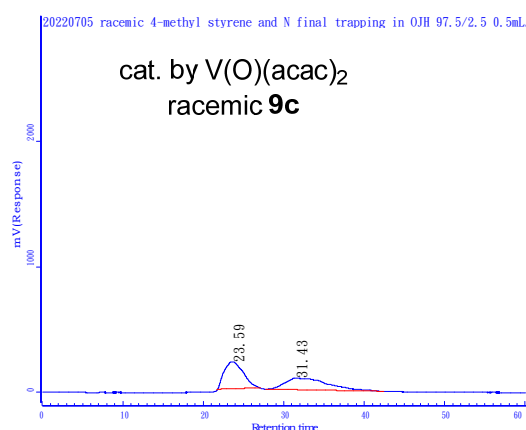

| # | Peak name | ax/min (min) | Area     | Area % | Assay % |
|---|-----------|--------------|----------|--------|---------|
| 0 |           | 23.588       | 35243.57 | 50.43  | 0.00    |
| 1 |           | 31.427       | 34638.60 | 49.57  | 0.00    |

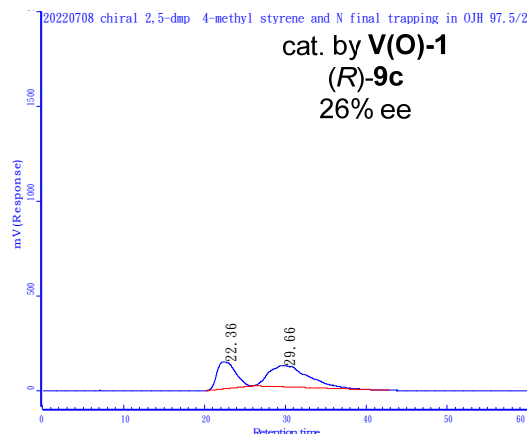

| # | Peak name | ax/min (min) | Area     | Area % | Assay % |
|---|-----------|--------------|----------|--------|---------|
| 0 |           | 22.361       | 22673.62 | 37.10  | 0.00    |
| 1 |           | 29.662       | 38437.98 | 62.90  | 0.00    |

**(*R*)-3-(1-(3-Bromophenyl)-3,3,3-trifluoropropoxy)-2-(methylthio)quinazolin-4(3H)-one **10a****

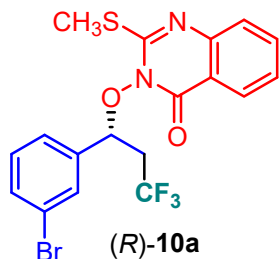

Data for **10a**: 114.7mg, 62% yield, 30h: <sup>1</sup>H NMR (500 MHz, CDCl<sub>3</sub>) δ 8.18 (d, *J* = 8.0 Hz, 1H), 7.70 (s, 1H), 7.68 (d, *J* = 7.6 Hz, 1H), 7.53 (d, *J* = 8.2 Hz, 1H), 7.49 (d, *J* = 8.2 Hz, 1H), 7.41-7.37 (m, 2H), 7.20 (t, *J* = 8.0 Hz, 1H), 5.98 (dd, *J* = 8.0, 5.4 Hz, 1H), 3.25-3.15 (m, 1H), 2.98-2.87 (m, 1H), 2.52 (s, 3H);

<sup>13</sup>C NMR (100 MHz, CDCl<sub>3</sub>) δ 158.3, 156.5, 146.5, 137.0, 133.2, 131.6, 130.1, 127.5, 126.8, 126.4, 125.8, 124.8 (q, <sup>1</sup>*J*<sub>C-F</sub> = 275.4 Hz), 122.5, 120.5, 81.1 (q, <sup>3</sup>*J*<sub>C-F</sub> = 2.4 Hz, 38.3 (q, <sup>2</sup>*J*<sub>C-F</sub> = 28.8 Hz), 13.8;

<sup>19</sup>F NMR (471 MHz, CDCl<sub>3</sub>) δ -62.83 (s, 3F); TLC *R*<sub>f</sub> 0.25 (EtOAc/hexanes, 1/20); HRMS (FD) [M]<sup>+</sup>

Calcd for C<sub>18</sub>H<sub>14</sub>N<sub>2</sub>O<sub>2</sub>F<sub>3</sub>BrS: 457.9906, found: 457.9897; HPLC analysis from racemic product: *t*<sub>R</sub>

15.1 min (*S*), 20.2 min (*R*) (Chiralpak AS-H, *i*-PrOH/hexane, 1.5/98.5, 0.8 ml/min, λ = 254 nm); For

the reaction catalyzed by **V(O)-1**: *t*<sub>R</sub> 15.8 min (minor, 31.0%), 21.7 min (major, 69.0%); [α]<sub>D</sub><sup>29</sup> +60.1

(*c* 0.42, CHCl<sub>3</sub>) for 38% ee (*R*); For the reaction catalyzed by **V(O)-2** (71.2 mg, 39% yield, 50h): *t*<sub>R</sub>

15.4 min (major, 75.0%), 21.4 min (minor, 25.0%); [α]<sub>D</sub><sup>29</sup> -77.2 (*c* 0.14, CHCl<sub>3</sub>) for 50% ee (*S*); For

racemic synthesis catalyzed by racemic **V(O)-1** in *i*-PrOH: 62% yield (114.3 mg, 30h).

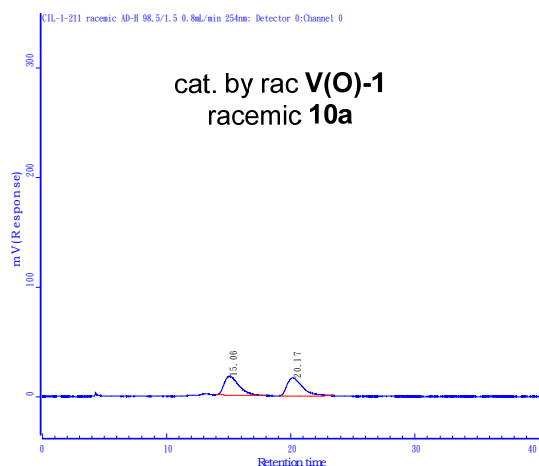

| # | Peak name | ax/min (min) | Area    | Area % | Assay % |
|---|-----------|--------------|---------|--------|---------|
| 0 |           | 15.056       | 1428.16 | 50.07  | 0.00    |
| 1 |           | 20.171       | 1424.13 | 49.93  | 0.00    |

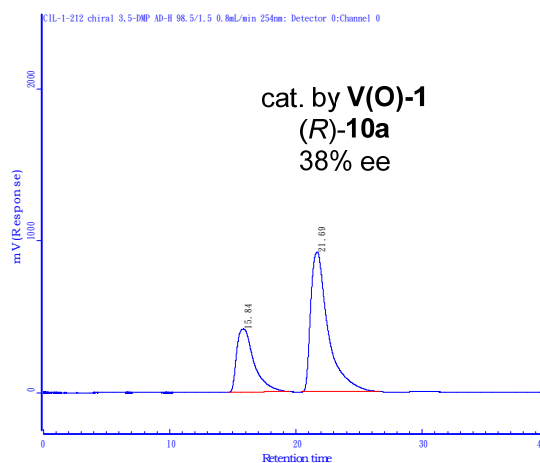

| # | Peak name | ax/min (min) | Area     | Area % | Assay % |
|---|-----------|--------------|----------|--------|---------|
| 0 |           | 15.837       | 39710.54 | 31.01  | 0.00    |
| 1 |           | 21.687       | 88349.59 | 68.99  | 0.00    |

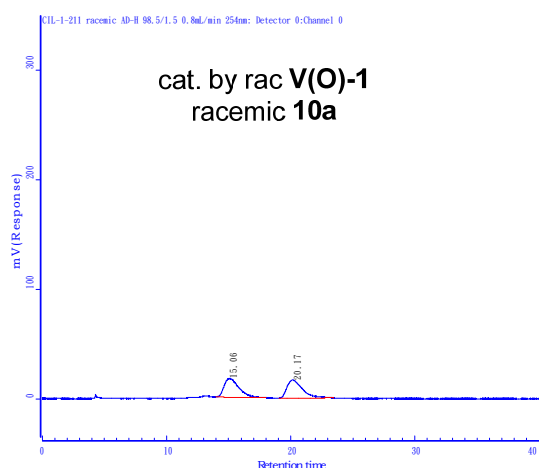

| # | Peak name | ax/min (min) | Area    | Area % | Assay % |
|---|-----------|--------------|---------|--------|---------|
| 0 |           | 15.056       | 1428.16 | 50.07  | 0.00    |
| 1 |           | 20.171       | 1424.13 | 49.93  | 0.00    |

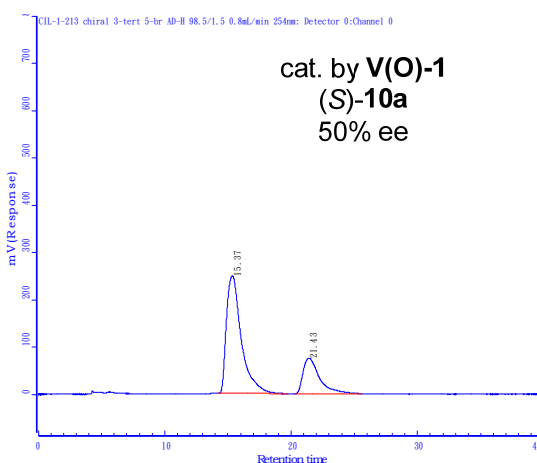

| # | Peak name | ax/min (min) | Area     | Area % | Assay % |
|---|-----------|--------------|----------|--------|---------|
| 0 |           | 15.368       | 20268.12 | 74.98  | 0.00    |
| 1 |           | 21.429       | 6763.41  | 25.02  | 0.00    |

## Representative catalytic procedure by **V(O)-1**

### 3-(3,3,3-Trifluoro-1-phenylpropoxy)quinazoline-2,4(1H,3H)-dione **11c**

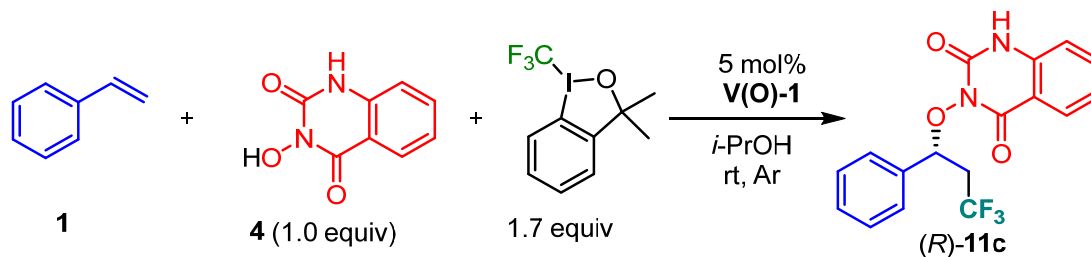

To an oven dried reaction tube (1.5 cm OD  $\times$  15.0 cm height) was placed **V(O)-1** (9.3 mg, 0.019 mmol, 4.5 mol%) and **4** (71.3 mg, 0.4 mmol, 1.0 equiv) in anhydrous *i*-PrOH (degassed by Ar, 2 mL)

followed by addition of styrene (45.8  $\mu\text{L}$ , 0.4 mmol) thru a microsyringe under Ar atmosphere. A solution of Togni reagent (224.5 mg, 0.68 mmol, 1.7 equiv) in anhydrous *i*-PrOH (1+1 mL) was added. The resulting reaction mixture was stirred at ambient temperature for 51 h and was concentrated by rotatory evaporation. The crude mixture was purified by flash column chromatography (EtOAc/hexanes, 1/2) on silica gel to give 122.7 mg (84%) of **11c** as a white solid:  $^1\text{H}$  NMR (400 MHz,  $\text{CDCl}_3$ )  $\delta$  10.25 (s, 1H), 8.06 (d,  $J = 7.8$  Hz, 1H), 7.62 (td,  $J = 7.2$ , 1.2 Hz, 1H), 7.52-7.50 (m, 2H), 7.32-7.30 (m, 3H), 7.24 (t,  $J = 7.2$  Hz, 1H), 7.08 (d,  $J = 8.2$  Hz, 1H), 5.80 (t,  $J = 6.4$  Hz, 1H), 3.30-3.16 (m, 1H), 2.93-2.80 (m, 1H);  $^{13}\text{C}$  NMR (100 MHz,  $\text{CDCl}_3$ )  $\delta$  159.4, 150.2, 137.5, 135.6, 135.3, 129.8, 128.5, 128.4, 128.3, 125.2 (q,  $^1J_{\text{C-F}} = 275.3$  Hz), 123.7, 115.3, 114.6, 81.6, 39.0 (q,  $^2J_{\text{C-F}} = 28.7$  Hz);  $^{19}\text{F}$  NMR (471 MHz,  $\text{CDCl}_3$ ):  $\delta$  -63.2 (s, 3F);  $R_f$  0.25 (EtOAc/hexanes, 1/2); HRMS (FD)  $[\text{M}+\text{H}]^+$  Calcd for  $\text{C}_{17}\text{H}_{14}\text{F}_3\text{N}_2\text{O}_3$ : 351.0951, found: 351.0954; HPLC analysis from racemic product:  $t_R$  15.5 min (*S*), 23.3 min (*R*) (Chiralpak AD-H, *i*-PrOH/*n*-hexane, 12/88, 0.8 mL/min,  $\lambda = 254$  nm); For the reaction reaction catalysed by **V(O)-1**: HPLC  $t_R$  15.3 min (major, 14.7%), 22.8 min (minor, 85.3%) for 71 %ee (*R*); For the reaction reaction catalysed by **V(O)-2** (120 h, 105.3 mg, 75%): HPLC  $t_R$  15.5 min (major, 87.5%), 23.4 min (minor, 12.5%) for 75 %ee (*S*). Racemic reaction catalyzed by  $\text{V}(\text{O})(\text{acac})_2$  in  $\text{CH}_3\text{CN}$  in 5h: 48.9 mg, 34% yield.

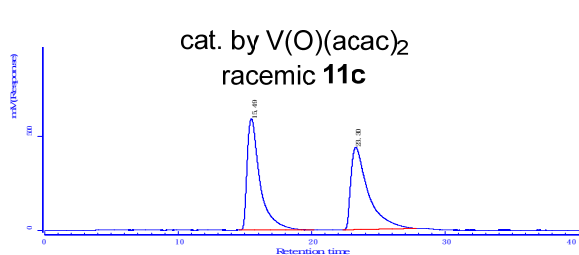

| # | Peak name | ax/min (min) | Area     | Area % | Assay % |
|---|-----------|--------------|----------|--------|---------|
| 0 |           | 15.488       | 39716.10 | 50.05  | 0.00    |
| 1 |           | 23.298       | 39634.96 | 49.95  | 0.00    |

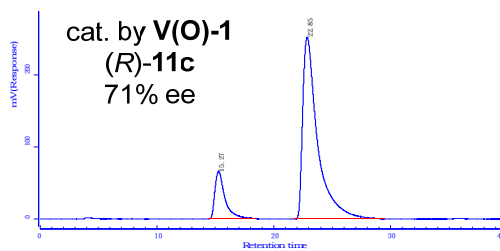

| # | Peak name | ax/min (min) | Area     | Area % | Assay % |
|---|-----------|--------------|----------|--------|---------|
| 0 |           | 15.272       | 3816.13  | 14.69  | 0.00    |
| 1 |           | 22.849       | 22163.39 | 85.31  | 0.00    |

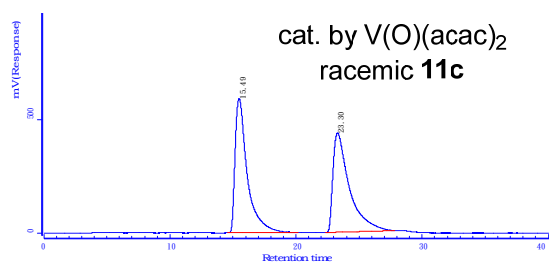

| # | Peak name | ax/min (min) | Area     | Area % | Assay % |
|---|-----------|--------------|----------|--------|---------|
| 0 |           | 15.488       | 39716.10 | 50.05  | 0.00    |
| 1 |           | 23.298       | 39634.96 | 49.95  | 0.00    |

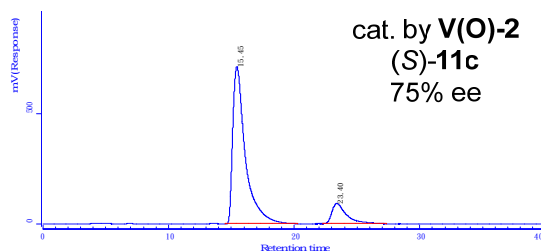

| # | Peak name | ax/min (min) | Area     | Area % | Assay % |
|---|-----------|--------------|----------|--------|---------|
| 0 |           | 15.449       | 49345.80 | 87.46  | 0.00    |
| 1 |           | 23.405       | 7072.98  | 12.54  | 0.00    |

### 3-(3,3,3-Trifluoro-1-(*m*-tolyl)propoxy)quinazoline-2,4(1*H*,3*H*)-dione **11b**

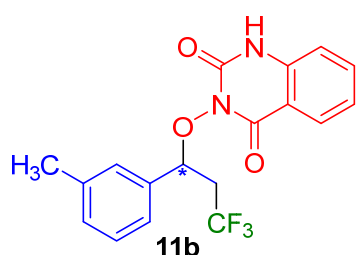

White solid; Yield: 84%/54% (122.7/78.8 mg, 10 mol% cat. **V(O)-1**/5 mol% cat. **V(O)-2**, 38/48 h);  $^1\text{H}$  NMR (400 MHz,  $\text{CDCl}_3$ )  $\delta$  10.51 (s, 1H), 8.07 (d,  $J = 8.0$  Hz, 1H), 7.62 (td,  $J = 7.8, 1.2$  Hz, 1H), 7.33-7.31 (m, 2H), 7.25 (d,  $J = 7.8$  Hz, 1H), 7.20 (t,  $J = 8.2$  Hz, 1H), 7.14-7.11 (m, 2H), 5.75 (t,  $J = 6.4$  Hz, 1H), 3.28-3.15 (m, 1H), 2.92-2.79 (m, 1H), 2.29 (s, 3H);  $^{13}\text{C}$  NMR (100 MHz,  $\text{CDCl}_3$ )  $\delta$  159.4, 150.4, 138.1, 137.6, 135.7, 135.3, 130.5, 129.0, 128.3, 125.5, 125.3 (q,  $^1J_{\text{C-F}} = 275.4$  Hz), 123.7, 115.4, 114.7, 81.7, 39.1 (q,  $^2J_{\text{C-F}} = 28.6$  Hz), 21.3;  $^{19}\text{F}$  NMR (471 MHz,  $\text{CDCl}_3$ )  $\delta$  -63.08 (s, 3F);  $R_f$  0.25 (EtOAc/Hexanes, 1/2); HRMS (ESI)  $[\text{M}]^+$  Calcd for  $\text{C}_{18}\text{H}_{15}\text{F}_3\text{N}_2\text{O}_3$ : 364.1029, found: 364.1026; HPLC analysis from racemic product:  $t_R$  19.4 min (*S*), 27.1 min (*R*) (Chiralpak AD-H, *i*-PrOH/n-hexane, 10/90, 0.6 ml/min,  $\lambda = 254$  nm). For the reaction reaction catalyzed by **V(O)-1**:  $t_R$  19.9 min (minor, 18.5%), 27.7 min (major, 81.5%);  $[\alpha]_D^{25} +122.5$  (c, 0.74,  $\text{CHCl}_3$ ) for 63% ee (*R*); For the reaction catalyzed by **V(O)-2** (54% yield, 48 h):  $t_R$  19.7 min (major, 84.0%), 27.8 min (minor, 16.0%) for 68% ee (*S*). For racemic synthesis by  $\text{V(O)(acac)}_2$  in  $\text{CH}_3\text{CN}$ : 30.1% (43.9 mg, 96 h).

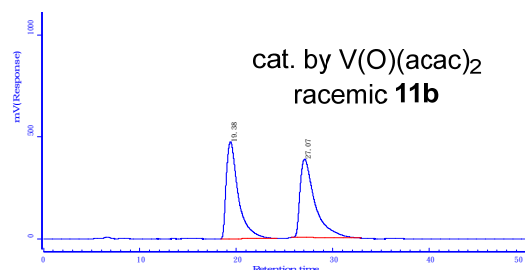

| # | Peak name | ax/min (min) | Area     | Area % | Assay % |
|---|-----------|--------------|----------|--------|---------|
| 0 |           | 19.375       | 41164.82 | 50.00  | 0.00    |
| 1 |           | 27.069       | 41157.93 | 50.00  | 0.00    |

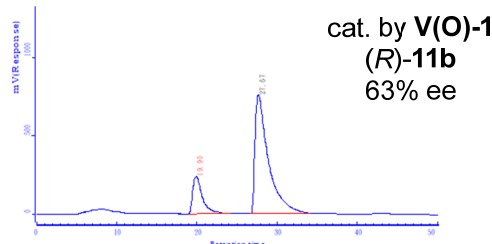

| # | Peak name | ax/min (min) | Area     | Area % | Assay % |
|---|-----------|--------------|----------|--------|---------|
| 0 |           | 19.902       | 20130.70 | 18.52  | 0.00    |
| 1 |           | 27.671       | 88548.41 | 81.48  | 0.00    |

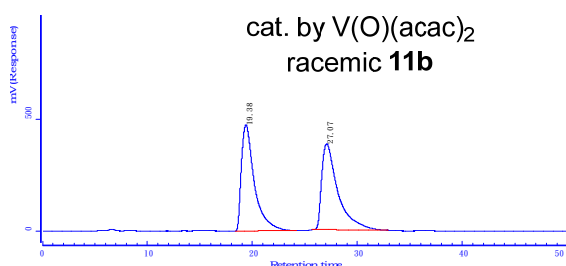

| # | Peak name | ax/min (min) | Area     | Area % | Assay % |
|---|-----------|--------------|----------|--------|---------|
| 0 |           | 19.375       | 41164.82 | 50.00  | 0.00    |
| 1 |           | 27.069       | 41157.93 | 50.00  | 0.00    |

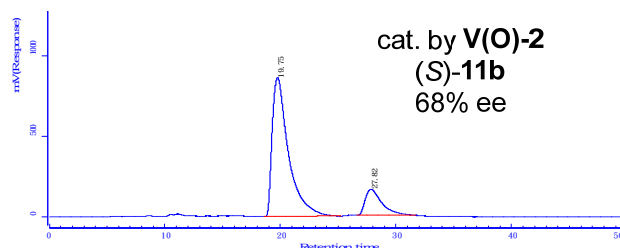

| # | Peak name | ax/min (min) | Area     | Area % | Assay % |
|---|-----------|--------------|----------|--------|---------|
| 0 |           | 19.746       | 83838.64 | 84.01  | 0.00    |
| 1 |           | 27.824       | 15962.32 | 15.99  | 0.00    |

**(R)-3-(1-(3-Chlorophenyl)-3,3,3-trifluoropropoxy)quinazoline-2,4(1H,3H)-dione 11a'**

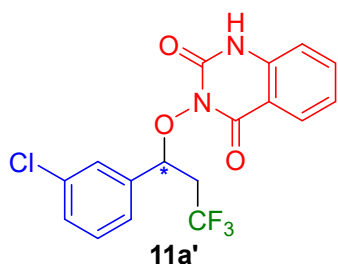

White solid; Yield: 83.1% (127.9 mg, 18h);  $^1\text{H}$  NMR (400 MHz,  $\text{CDCl}_3$ )

$\delta$  10.48 (s, 1H), 8.08 (d,  $J = 8.0$  Hz, 1H), 7.65 (td,  $J = 7.8, 1.0$  Hz, 1H), 7.57 (s, 1H), 7.40 (d,  $J = 7.2$  Hz, 1H), 7.33-7.30 (m, 1H), 7.29-7.27 (m, 1H), 7.62-7.24 (m, 1H), 7.12 (d,  $J = 8.0$  Hz, 1H), 5.71 (t,  $J = 6.6$  Hz, 1H),

3.27-3.14 (m, 1H), 2.89-2.76 (m, 1H);  $^{13}\text{C}$  NMR (100 MHz,  $\text{CDCl}_3$ )  $\delta$  159.4, 150.3, 138.0, 137.5,

135.5, 134.3, 129.9, 129.8, 128.5, 128.4, 126.6, 125.0 (q,  $^1J_{\text{C-F}} = 275.4$  Hz), 123.9, 115.5, 114.6, 81.2,

39.2 (q,  $^2J_{\text{C-F}} = 28.9$  Hz);  $^{19}\text{F}$  NMR (471 MHz,  $\text{CDCl}_3$ )  $\delta$  -63.08 (s, 3F);  $R_f$  0.25 (EtOAc/Hexanes, 1/2);

HRMS (FD)  $[M]^+$  Calcd for  $\text{C}_{17}\text{H}_{12}\text{F}_3\text{N}_2\text{O}_3\text{Cl}$ : 384.0483, found: 384.0480; HPLC analysis from

racemic product:  $t_R$  19.05 min (S), 26.40 min (R) (Chiralpak AD-H, *i*-PrOH/hexane, 12/88, 0.6 ml/min,

$\lambda = 254$  nm). For the reaction catalyzed by **V(O)-1**:  $t_R$  19.13 min (minor, 14.1%), 26.22 min (major,

85.9%);  $[\alpha]_D^{30} +124.0$  (c, 1.0,  $\text{CHCl}_3$ ) for 72% ee (R); 74.3% yield (114.3 mg, 18h) for racemic

synthesis catalyzed by racemic **V(O)-1**.

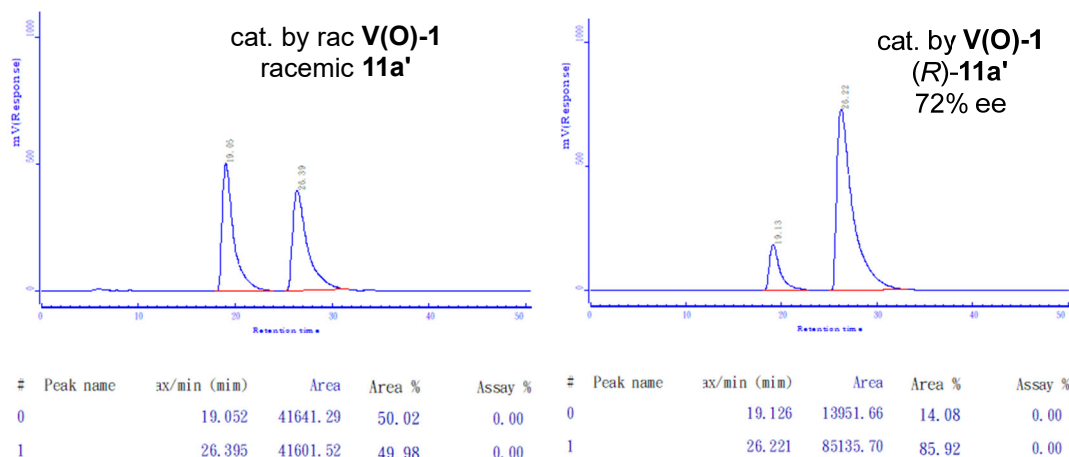

**(R)-3-(1-(3-Bromophenyl)-3,3,3-trifluoropropoxy)quinazoline-2,4(1H,3H)-dione 11a**

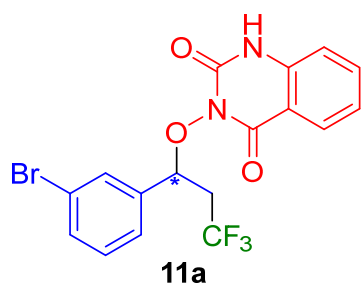

White solid; Yield 88% (144.2 mg, 43h); Data for **10a**:  $^1\text{H}$  NMR (400 MHz,  $\text{CDCl}_3$ )  $\delta$  10.49 (s, 1H), 8.08 (d,  $J = 7.8$  Hz, 1H), 7.62 (td,  $J = 7.2$ , 1.4 Hz, 1H), 7.48-7.45 (m, 2H), 7.26 (t,  $J = 8.0$  Hz, 1H), 7.21 (t,  $J = 7.8$  Hz, 1H), 7.13 (d,  $J = 8.2$  Hz, 1H), 5.70 (t,  $J = 6.6$  Hz, 1H), 3.27-3.14 (m, 1H), 2.89-2.76 (m, 1H);  $^{13}\text{C}$  NMR (100 MHz,  $\text{CDCl}_3$ )  $\delta$  159.4, 150.3,

138.2, 137.6, 135.5, 132.8, 131.4, 130.0, 128.4, 127.0, 125.0 (q,  $^1J_{\text{C-F}} = 275.3$  Hz), 123.9, 122.4, 115.6, 114.6, 81.1, 39.2 (q,  $^2J_{\text{C-F}} = 28.8$  Hz);  $^{19}\text{F}$  NMR (471 MHz,  $\text{CDCl}_3$ )  $\delta$  -63.05 (s, 3F);  $R_f$  0.25 (EtOAc/Hexanes, 1/2); HRMS (FD)  $[M]^+$  Calcd for  $\text{C}_{17}\text{H}_{12}\text{F}_3\text{N}_2\text{O}_3\text{Br}$ : 427.9978, found: 427.9976; HPLC analysis from racemic product:  $t_R$  12.8 min (*S*), 18.3 min (*R*) (Chiralpak AD-H, *i*-PrOH/hexane, 14/86, 0.8 ml/min,  $\lambda = 254$  nm). For the reaction reaction catalyzed by **V(O)-1**:  $t_R$  12.8 min (minor, 11.7%), 18.3 min (major, 88.3%);  $[\alpha]_D^{24} +65.9$  (*c*, 1.0,  $\text{CHCl}_3$ ) for 77% ee (*R*). For the reaction catalyzed by **V(O)-2** (53% yield, 120h):  $t_R$  12.9 min (major, 86.9%), 18.7 min (major, 13.1%) for 74% ee (*S*); For racemic synthesis catalyzed by  $\text{V(O)(acac)}_2$  in  $\text{CH}_3\text{CN}$ : 30.6% yield (52.5 mg, 17h).

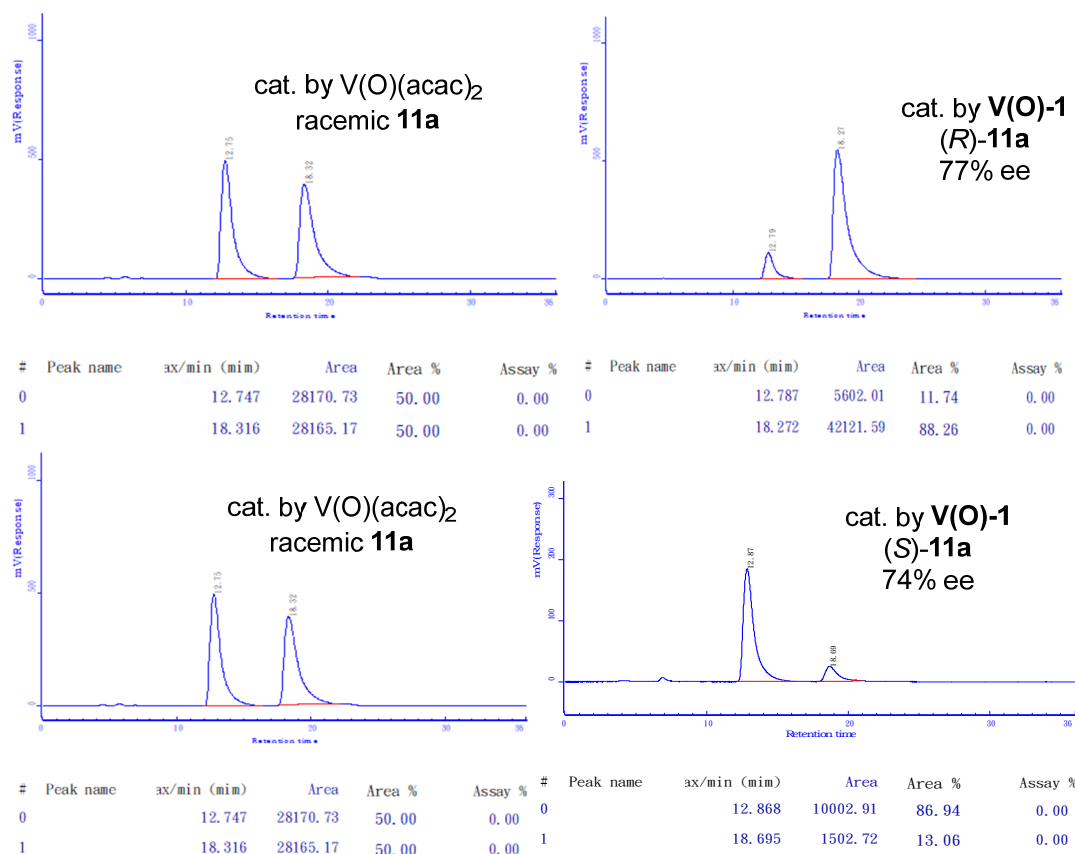

## Representative catalytic procedure by V(O)-1

### (*R*)-3-(1-(3-Bromophenyl)-3,3,3-trifluoropropoxy)-1-phenylquinazoline-2,4(1*H*,3*H*)-dione **12a**

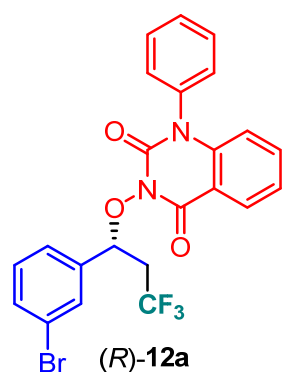

Data for **12a**: 187.3 mg, 93% yield, 18h: <sup>1</sup>H NMR (400 MHz, CDCl<sub>3</sub>): δ 8.18 (dd, *J* = 7.9, 1.4, 1H), 7.66 (t, *J* = 1.8 Hz, 1H), 7.61-7.43 (m, 6H), 7.28-7.19 (m, 4H), 6.50 (d, *J* = 8.4 Hz, 1H), 5.78 (t, *J* = 6.5 Hz, 1H), 3.25-3.12 (m, 1H), 2.91-2.78 (m, 1H); <sup>13</sup>C NMR (126 MHz, CDCl<sub>3</sub>): δ 158.9, 148.9, 140.6, 138.0, 135.6, 134.9, 132.7, 131.5, 130.4, 130.4, 130.1, 129.7, 128.9, 128.8, 128.6, 127.0, 125.0 (q, <sup>1</sup>*J*<sub>C-F</sub> = 279.0 Hz), 123.6, 122.2, 115.6, 114.8, 80.7 (q, <sup>3</sup>*J*<sub>C-F</sub> =

3.0 Hz), 38.9 (q, <sup>2</sup>*J*<sub>C-F</sub> = 28.7 Hz); <sup>19</sup>F NMR (471 MHz, CDCl<sub>3</sub>): δ -62.98 (s, 3F); TLC *R*<sub>f</sub> 0.30 (EtOAc/hexanes, 1/6); HRMS (FD) [*M*]<sup>+</sup> Calcd for C<sub>23</sub>H<sub>16</sub>BrF<sub>3</sub>N<sub>2</sub>O<sub>3</sub>: 504.0291, found: 504.0287; HPLC analysis from racemic product: *t*<sub>R</sub> 19.3 min (*R*), 22.8 min (*S*); From the reaction catalyzed by V(O)-1: *t*<sub>R</sub> 20.65 min (major, 84.1%), 24.59 min (minor, 15.9%) (Chiralpak AS-H, *i*-PrOH/*n*-hexane, 05/95, 1.0 mL/min, λ = 254 nm); [α]<sub>D</sub><sup>22</sup> +108.4 (*c* 1.0, CHCl<sub>3</sub>) for 68% ee (*R*); From the reaction

catalyzed by **V(O)-2** in EtOH (46% yield, 96 h):  $t_R$  20.6 min (minor, 13.8%), 24.9 min (major, 86.2%) for 72% ee (*S*).

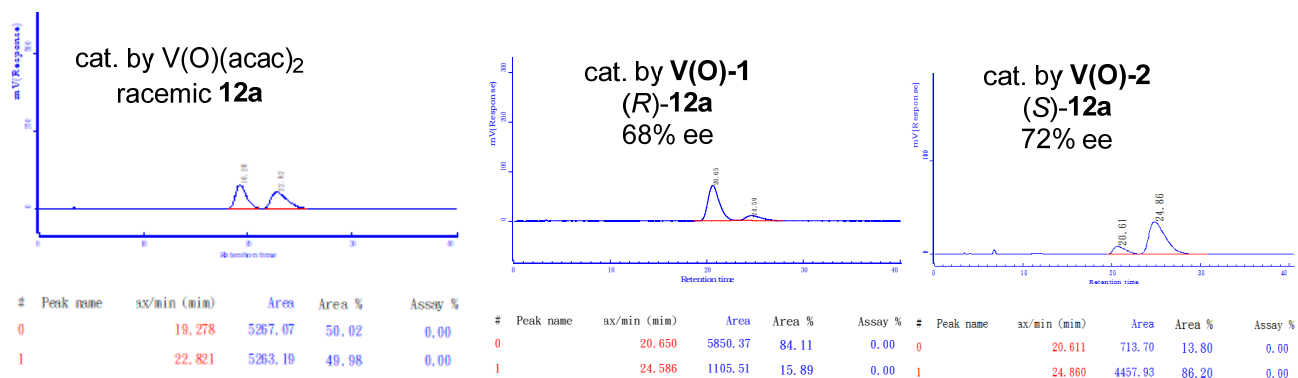

### (*R*)-1-Phenyl-3-(3,3,3-trifluoro-1-(*m*-tolyl)propoxy)quinazoline-2,4(1*H*,3*H*)-dione **12b**

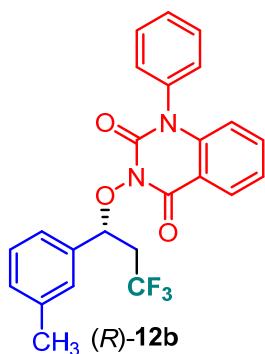

Data for **12b**: 104.2 mg, 59% yield, 17h:  $^1\text{H}$  NMR (400 MHz,  $\text{CDCl}_3$ )  $\delta$  8.18 (dd,  $J = 7.9, 1.0$  Hz, 1H), 7.60-7.15 (m, 11H), 6.48 (d,  $J = 8.7$  Hz, 1H), 5.83 (t,  $J = 6.2$  Hz, 1H), 3.25-3.15 (m, 1H), 2.93-2.83 (m, 1H), 2.32 (s, 1H);  $^{13}\text{C}$  NMR (100 MHz,  $\text{CDCl}_3$ )  $\delta$  159.0, 149.0, 140.6, 138.0, 135.7, 135.5, 134.8, 130.4, 129.6, 129.2, 128.9, 128.9, 128.6, 128.3, 125.6, 125.3 ( $^1J_{\text{C-F}} = 277.2$  Hz), 123.4, 115.5, 114.9, 81.4 ( $^3J_{\text{C-F}} = 2.9$  Hz), 38.9 ( $^2J_{\text{C-F}} = 28.5$  Hz), 21.2;  $^{19}\text{F}$  NMR (471

MHz,  $\text{CDCl}_3$ )  $\delta$  -63.2 (s, 3F); TLC  $R_f$  0.28 (EtOAc/hexanes, 1/6); HRMS (FD) Calcd for  $\text{C}_{24}\text{H}_{19}\text{F}_3\text{N}_2\text{O}_3$ : 440.1353, found: 440.1359; HPLC from racemic product:  $t_R$  19.3 min (*R*), 22.8 min (*S*); From the reaction catalyzed by **V(O)-1**:  $t_R$  25.80 min (major, 88.6%), 29.74 min (minor, 11.4%) (Chiralpak AS-H, *i*-PrOH/*n*-hexane, 2/98, 1.0 mL/min,  $\lambda = 254$  nm);  $[\alpha]_D^{22} +72.6$  ( $c$  1.0,  $\text{CHCl}_3$ ) for 77% ee (*R*); From the reaction catalyzed by **V(O)-2** in *i*-PrOH (56% yield, 130h):  $t_R$  26.9 min (minor, 18%), 30.0 min (major, 82%) for 64% ee (*S*); From the reaction catalyzed by **V(O)-2** in EtOH (54% yield, 24h):  $t_R$  27.1 min (minor, 12.3%), 30.5 min (major, 87.7%) for 75.4% ee (*S*).



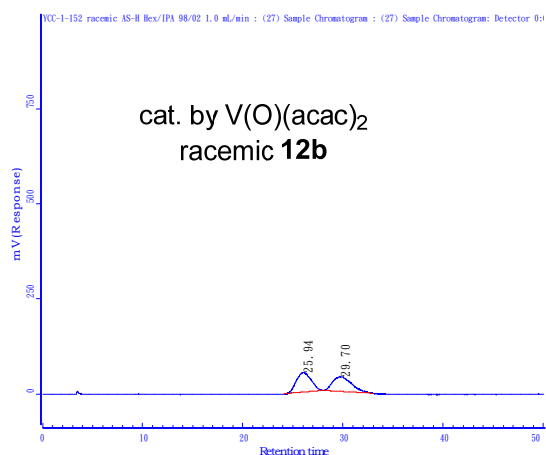

| # | Peak name | ax/min (min) | Area    | Area % | Assay % |
|---|-----------|--------------|---------|--------|---------|
| 0 |           | 25.943       | 5225.68 | 50.80  | 0.00    |
| 1 |           | 29.696       | 5061.21 | 49.20  | 0.00    |

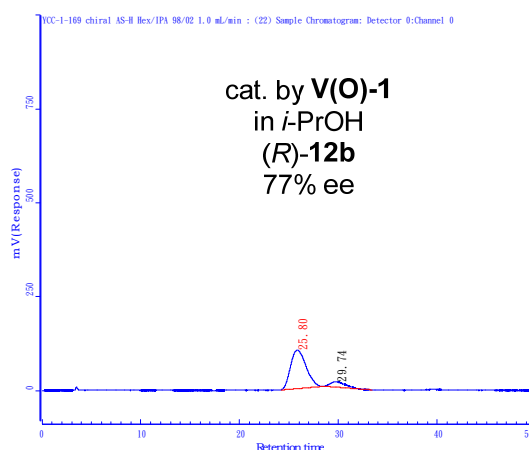

| # | Peak name | ax/min (min) | Area     | Area % | Assay % |
|---|-----------|--------------|----------|--------|---------|
| 0 |           | 25.804       | 11159.31 | 88.58  | 0.00    |
| 1 |           | 29.744       | 1438.38  | 11.42  | 0.00    |

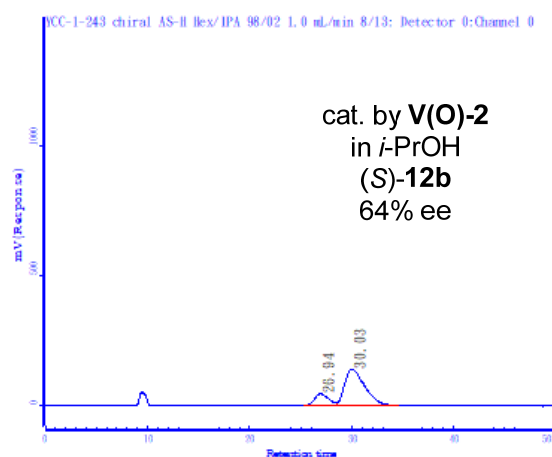

| # | Peak name | ax/min (min) | Area     | Area % | Assay % |
|---|-----------|--------------|----------|--------|---------|
| 0 |           | 26.942       | 4246.58  | 17.94  | 0.00    |
| 1 |           | 30.030       | 19418.90 | 82.06  | 0.00    |

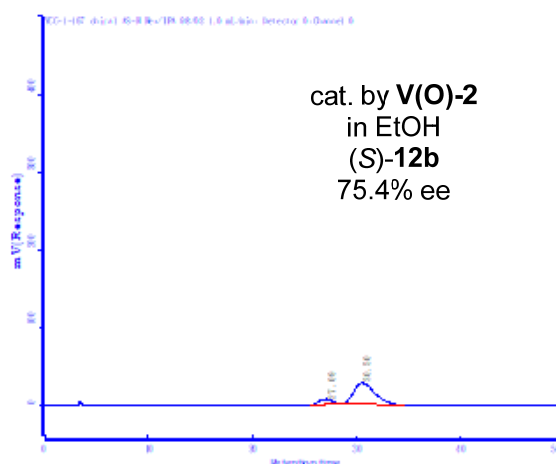

| # | Peak name | ax/min (min) | Area    | Area % | Assay % |
|---|-----------|--------------|---------|--------|---------|
| 0 |           | 27.063       | 513.06  | 12.29  | 0.00    |
| 1 |           | 30.500       | 3660.08 | 87.71  | 0.00    |

**(*R*)-1-Phenyl-3-(3,3,3-trifluoro-1-(*p*-tolyl)propoxy)quinazoline-2,4(1*H*,3*H*)-dione **12c****

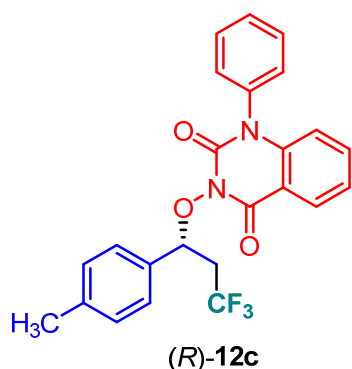

Data for **12c**: 104.5 mg, 80% yield, 24h: <sup>1</sup>H NMR (400 MHz, CDCl<sub>3</sub>) δ 8.17 (dd, *J* = 7.9, 1.1 Hz, 1H), 7.60-7.11 (m, 11 H), 6.47 (d, *J* = 8.3 Hz, 1H), 5.83 (t, *J* = 6.4 Hz, 1H), 3.26-3.13 (m, 1H), 2.94-2.80 (m, 1H), 2.32 (s, 3H); <sup>13</sup>C NMR (100 MHz, CDCl<sub>3</sub>) δ 159.0, 148.9, 140.6, 139.6, 135.7, 134.7, 132.5, 130.4, 129.6, 129.0, 128.9, 128.6, 125.3 (<sup>1</sup>*J*<sub>C-F</sub> = 276.9 Hz), 123.4, 115.5, 114.9, 81.1, 38.8 (<sup>2</sup>*J*<sub>C-F</sub> = 28.6 Hz), 21.2; <sup>19</sup>F NMR (471

MHz, CDCl<sub>3</sub>) δ -63.1 (s, 3F); TLC *R*<sub>f</sub> 0.27 (EtOAc/hexanes, 1/6); HRMS (FD) Calcd for

C<sub>24</sub>H<sub>19</sub>F<sub>3</sub>N<sub>2</sub>O<sub>3</sub>: 440.1353, found: 440.1340; HPLC analysis from racemic product: *t*<sub>R</sub> 32.93 min (*R*), 39.22 min (*S*) (Chiralpak AS-H, *i*-PrOH/*n*-hexane, 2/98, 1.0 mL/min, λ = 254 nm); From the reaction catalyzed by **V(O)-1**: *t*<sub>R</sub> 32.34 min (major, 74%), 38.27 min (minor, 26%); [α]<sub>D</sub><sup>22</sup> +112.9 (*c* 1.0, CHCl<sub>3</sub>) for 48% ee (*R*); From the reaction catalyzed by **V(O)-2** in EtOH (64% yield, 96 h): *t*<sub>R</sub> 33.4 min (minor, 13.2%), 38.3 min (major, 86.8%) for 74% ee (*S*).

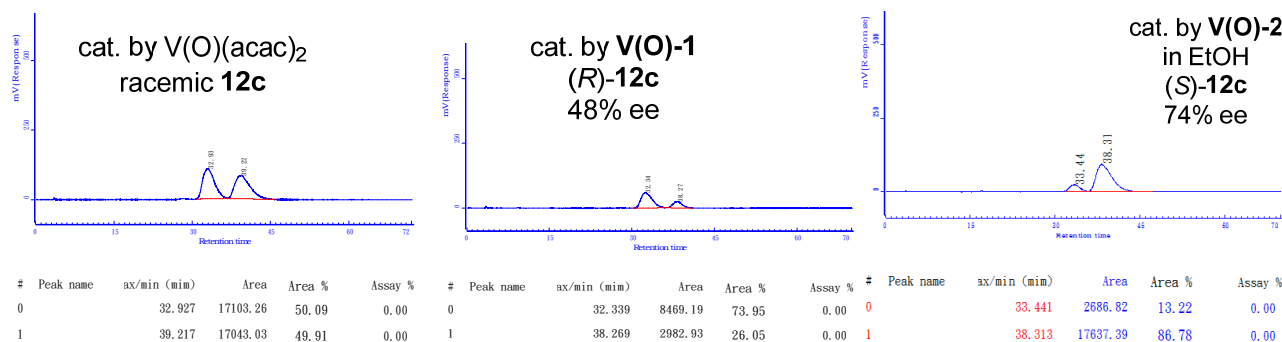

### (*R*)-1-Benzyl-3-(1-(3-bromophenyl)-3,3,3-trifluoropropoxy)quinazoline-2,4(1*H*,3*H*)-dione **13a**

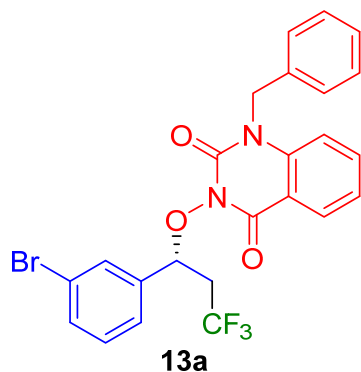

White solid; Yield 96/82% (198.6 mg for 0.4 mmol scale in EtOH or *i*-PrOH, 26h/44h); Data for **13a**: <sup>1</sup>H NMR (400 MHz, CDCl<sub>3</sub>) δ 8.17 (dd, *J* = 7.8, 1.4 Hz 1H), 7.67 (t, *J* = 1.8 Hz, 1H), 7.54-7.49 (m, 3H), 7.33-7.28 (m, 3H), 7.25-7.20 (m, 2H), 7.04-7.01 (m, 3H), 5.82 (t, *J* = 6.4 Hz, 1H), 5.39 (d, *J* = 16.4 Hz, 1H), 5.16 (d, *J* = 16.4 Hz, 1H), 3.27-3.14 (m, 1H), 2.91-2.78 (m, 1H); <sup>13</sup>C NMR (100 MHz, CDCl<sub>3</sub>) δ 159.0, 149.8,

139.2, 138.1, 135.5, 135.1, 133.0, 131.9, 130.2, 129.2, 129.2, 128.0, 127.4, 126.4, 125.2 (q, <sup>1</sup>*J*<sub>C-F</sub> = 275.5 Hz), 123.7, 122.5, 115.6, 114.8, 80.7, 47.5, 39.2 (q, <sup>2</sup>*J*<sub>C-F</sub> = 28.8 Hz); <sup>19</sup>F NMR (471 Hz, CDCl<sub>3</sub>) δ -63.1 (s, 3F); TLC *R*<sub>f</sub> 0.25 (EtOAc/hexanes, 1/4); HRMS (FD) Calcd for C<sub>24</sub>H<sub>18</sub>BrF<sub>3</sub>N<sub>2</sub>O<sub>3</sub>: 518.0447, found: 518.0455.

For racemic synthesis catalyzed by V(O)(acac)<sub>2</sub> in CH<sub>3</sub>CN: 26% yield (53.6 mg, 17h): HPLC analysis from racemic product: *t*<sub>R</sub> 15.8min (*R*), 23.3 min (*S*) (Chiralpak AS-H, *i*-PrOH/hexane, 10/90, 1.0 ml/min, λ = 254 nm); For the reaction catalyzed by **V(O)-1**: *t*<sub>R</sub> 16.8 min (major, 91.9%), 25.3 min

(minor, 8.1%);  $[\alpha]_D^{25} +108.0$  ( $c$ , 1.0,  $\text{CHCl}_3$ ) for 84% ee ( $R$ ); X-ray crystallographic analysis was done for recrystallized ( $R$ )-**13a** (95% ee) from a mixed solvent of  $n$ -hexane/acetone (1/2.5).

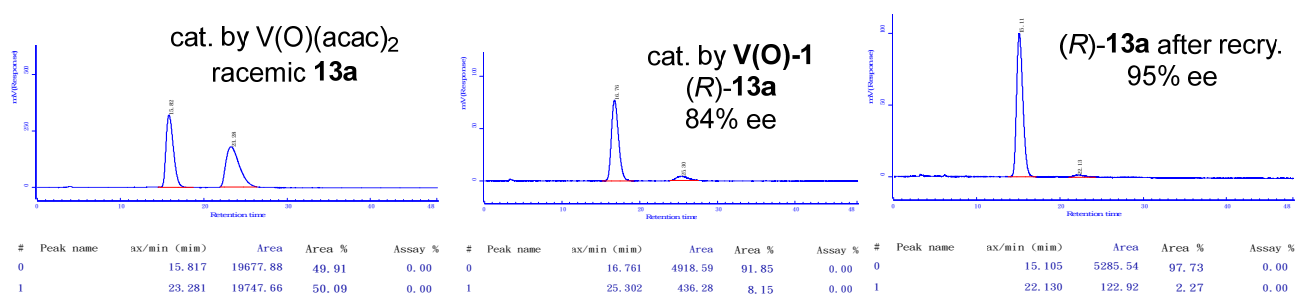

For the reaction catalyzed by **V(O)-2**: Yield 45% (93 mg, 120h);  $t_R$  15.3 min (minor, 13.1%), 22.6 min (major, 86.9%) for 74% ee ( $S$ ).

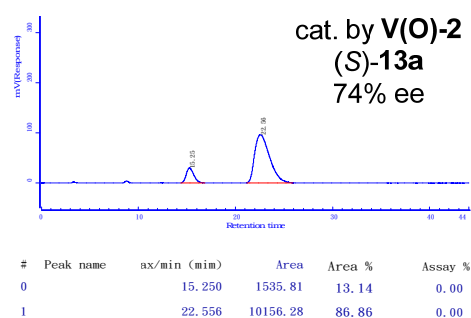

### ( $R$ )-1-Benzyl-3-(1-(3-chlorophenyl)-3,3,3-trifluoropropoxy)quinazoline-2,4(1H,3H)-dione **13a'**

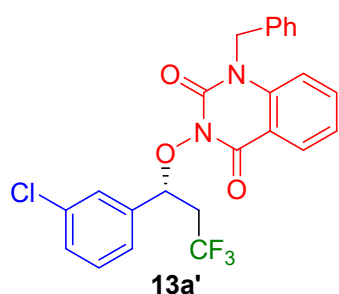

White solid; Yield: 82.5% (156.7 mg, 65h);  $^1\text{H}$  NMR (400 MHz,  $\text{CDCl}_3$ )

$\delta$  8.17 (dd,  $J = 7.8, 1.4$  Hz 1H), 7.53-7.49 (m, 3H), 7.46 (d,  $J = 7.6$  Hz, 1H), 7.36-7.24 (m, 5H), 7.21 (t,  $J = 7.8$  Hz, 2H), 7.04-7.01 (m, 3H), 5.83 (t,  $J = 6.4$  Hz, 1H), 5.39 (d,  $J = 16.4$  Hz, 1H), 5.16 (d,  $J = 16.4$  Hz, 1H), 3.27-3.14 (m, 1H), 2.92-2.79 (m, 1H);  $^{13}\text{C}$  NMR (100 MHz,  $\text{CDCl}_3$ )  $\delta$

158.8, 149.6, 139.0, 137.7, 135.3, 135.0, 134.3, 129.9, 129.8, 129.0, 128.9, 128.8, 127.8, 126.8, 126.2, 125.0 (q,  $^1J_{\text{C-F}} = 275.4$  Hz), 123.5, 115.4, 114.6, 80.6 (q,  $^3J_{\text{C-F}} = 2.5$  Hz), 47.3, 39.0 (q,  $^2J_{\text{C-F}} = 28.8$  Hz);  $^{19}\text{F}$  NMR (471 MHz,  $\text{CDCl}_3$ )  $\delta$  -63.1 (s, 3F);  $R_f$  0.25 (EtOAc/Hexanes, 1/4); HRMS (FD)  $[\text{M}]^+$  Calcd for  $\text{C}_{24}\text{H}_{18}\text{F}_3\text{N}_2\text{O}_3\text{Cl}$ : 474.0953, found: 474.0949.

For racemic synthesis catalyzed by  $\text{V}(\text{O})(\text{acac})_2$  in  $\text{CH}_3\text{CN}$ : 23% yield (43.7 mg, 18h); HPLC analysis from racemic product:  $t_R$  12.22 min ( $R$ ), 17.92 min ( $R$ ) (Chiralpak AS-H,  $i$ -PrOH/hexane, 10/90, 1.2 ml/min,  $\lambda = 254$  nm); For the reaction catalyzed by **V(O)-1**:  $t_R$  12.11 min (major, 92.3%),

17.65 min (minor, 9.7%);  $[\alpha]_D^{30} +112.6$  (*c*, 1.0, CHCl<sub>3</sub>) for 81% ee (*R*).

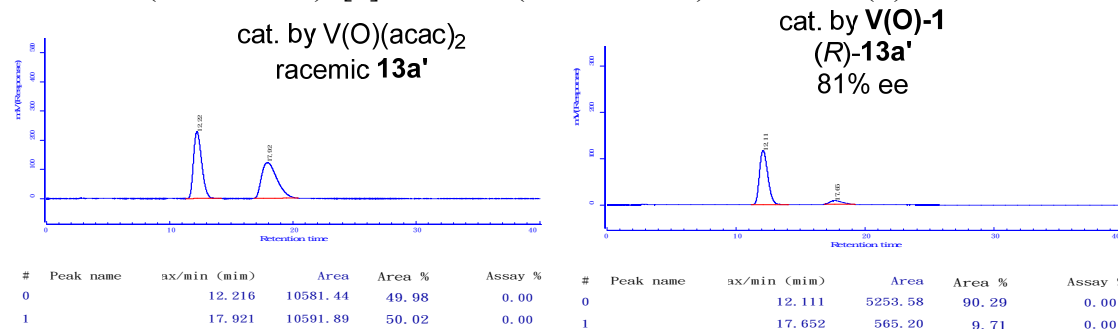

**(*R*)-1-Benzyl-3-(3,3,3-trifluoro-1-(3-(trifluoromethyl)phenyl)propoxy)quinazoline-2,4(1*H*,3*H*)-dione **13b****

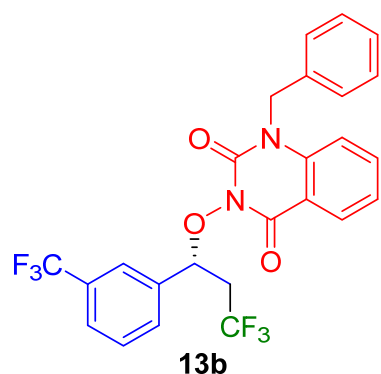

White solid; Yield 88% (178.3 mg, 46h); Data for **13b**: <sup>1</sup>H NMR (400 MHz, CDCl<sub>3</sub>) δ 8.16 (dd, *J* = 7.9, 1.1 Hz, 1H), 7.80-7.83 (m, 2H), 7.63 (d, *J* = 7.9 Hz, 1H), 7.53-7.48 (m, 2H), 7.30-7.24 (m, 3H), 7.21 (t, *J* = 7.6 Hz, 1H), 7.05-7.01 (m, 3H), 5.91 (t, *J* = 6.7 Hz, 1H), 5.35 (d, *J* = 16.4 Hz, 1H), 5.19 (d, *J* = 16.4 Hz, 1H), 3.30-3.20 (m, 1H), 2.94-2.84 (m, 1H); <sup>13</sup>C NMR (100 MHz, CDCl<sub>3</sub>) δ 158.8, 149.6, 139.0, 136.8,

135.4, 134.9, 132.0, 130.8 (q, <sup>2</sup>*J*<sub>C-F</sub> = 32.4 Hz), 129.0, 129.0, 127.8, 126.5 (q, <sup>3</sup>*J*<sub>C-F</sub> = 3.3 Hz), 126.1, 125.5 (q, <sup>3</sup>*J*<sub>C-F</sub> = 3.3 Hz), 125.0 (q, <sup>1</sup>*J*<sub>C-F</sub> = 275.4 Hz), 123.7 (q, <sup>1</sup>*J*<sub>C-F</sub> = 271.0 Hz), 123.5, 115.3, 114.7, 80.6 (q, <sup>3</sup>*J*<sub>C-F</sub> = 2.3 Hz), 47.4, 39.0 (q, <sup>2</sup>*J*<sub>C-F</sub> = 28.9 Hz); <sup>19</sup>F NMR (471 Hz, CDCl<sub>3</sub>) δ -62.69 (s, 3F), -63.02 (s, 3F); TLC *R*<sub>f</sub> 0.25 (EtOAc/hexanes, 1/5); HRMS (FD) Calcd for C<sub>25</sub>H<sub>18</sub>N<sub>2</sub>O<sub>3</sub>F<sub>6</sub>: 508.1216, found: 508.1213; HPLC analysis from racemic product: *t*<sub>R</sub> 11.4 min (*R*), 15.9 min (*S*) (Chiralpak AS-H, *i*-PrOH/hexane, 7/93, 1.0 ml/min, λ = 254 nm). For the reaction catalyzed by **V(O)-1**: *t*<sub>R</sub> 10.8 min (major, 91.0%), 15.2 min (minor, 9.0%);  $[\alpha]_D^{30} +119.9$  (*c*, 1.0, CHCl<sub>3</sub>) for 82% ee (*R*). For racemic synthesis catalyzed by V(O)(acac)<sub>2</sub> in CH<sub>3</sub>CN: 27% yield (54.9 mg, 20h).

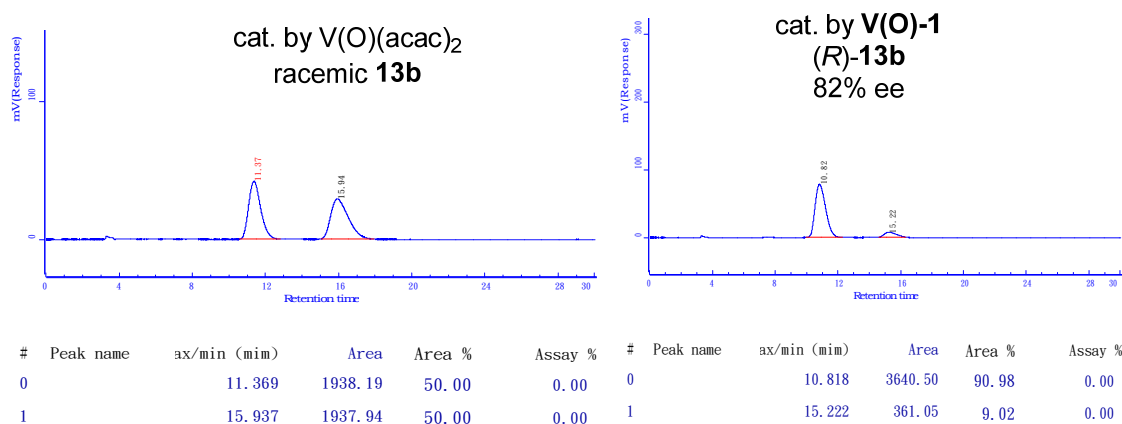

**Methyl (*R*)-3-(1-((1-Benzyl-2,4-dioxo-1,4-dihydroquinazolin-3(2H)-yl)oxy)-3,3,3-trifluoropropyl)-benzoate **13b'****

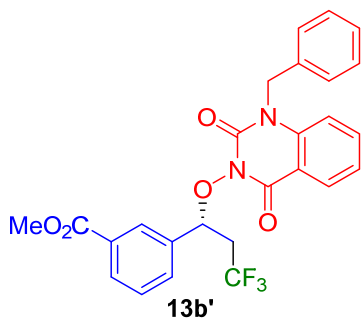

White solid; Yield 90% (180.1 mg, 46h); Data for **13b'**: <sup>1</sup>H NMR (400 MHz, CDCl<sub>3</sub>) δ 8.16-8.13 (m, 2H), 8.05 (d, *J* = 7.8 Hz, 1H), 7.81 (d, *J* = 7.8 Hz, 1H), 7.51-7.42 (m, 2H), 7.26-7.24 (m, 3H), 7.18 (t, *J* = 7.6 Hz, 1H), 7.01 (d, *J* = 8.4 Hz, 1H), 6.97-6.95 (m, 2H), 5.90 (t, *J* = 6.6 Hz, 1H), 5.36 (d, *J* = 16.4 Hz, 1H), 5.11 (d, *J* = 16.4 Hz, 1H), 3.87 (s, 3H), 3.22-3.19 (m, 1H), 2.97-2.83 (m, 1H); <sup>13</sup>C NMR (100 MHz, CDCl<sub>3</sub>)

δ 166.3, 158.7, 149.5, 138.9, 136.1, 135.3, 134.9, 133.1, 130.9, 130.3, 129.8, 128.9, 128.6, 127.7, 126.1, 125.2 (q, <sup>1</sup>*J*<sub>C-F</sub> = 275.3 Hz), 123.4, 115.3, 114.6, 80.8, 52.1, 47.2, 38.9 (q, <sup>2</sup>*J*<sub>C-F</sub> = 28.8 Hz); <sup>19</sup>F NMR (471 Hz, CDCl<sub>3</sub>) δ -62.99 (s, 3F); TLC *R*<sub>f</sub> 0.25 (EtOAc/hexanes, 1/2); HRMS (FD) [M]<sup>+</sup> Calcd for C<sub>26</sub>H<sub>21</sub>N<sub>2</sub>O<sub>5</sub>F<sub>3</sub>: 498.1398, found: 498.1397; HPLC analysis from racemic product: *t*<sub>R</sub> 14.7 min (*R*), 18.4 min (*S*) (Chiralpak AS-H, *i*-PrOH/hexane, 15/85, 1.2 ml/min, λ = 254 nm). For the reaction catalyzed by **V(O)-1**: *t*<sub>R</sub> 14.8 min (major, 90.4%), 18.5 min (minor, 9.6%); [α]<sub>D</sub><sup>30</sup> +137.1 (*c*, 1.0, CHCl<sub>3</sub>) for 81% ee (*R*). For racemic synthesis catalyzed by V(O)(acac)<sub>2</sub> in CH<sub>3</sub>CN: 28% yield (55.8 mg, 17h).

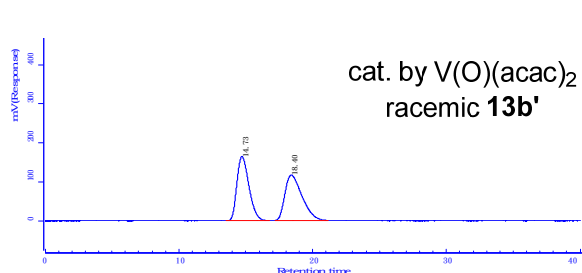

| # | Peak name | ax/min (min) | Area     | Area % | Assay % |
|---|-----------|--------------|----------|--------|---------|
| 0 |           | 14.725       | 10274.04 | 49.96  | 0.00    |
| 1 |           | 18.399       | 10289.90 | 50.04  | 0.00    |

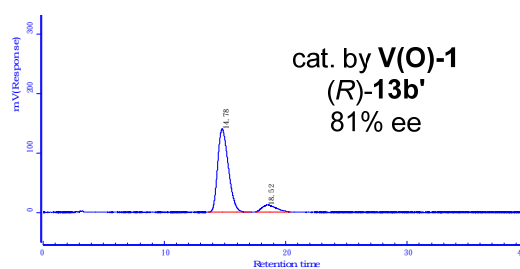

| # | Peak name | ax/min (min) | Area    | Area % | Assay % |
|---|-----------|--------------|---------|--------|---------|
| 0 |           | 14.779       | 8581.88 | 90.44  | 0.00    |
| 1 |           | 18.523       | 906.99  | 9.56   | 0.00    |

### 3-(1-(3-bromophenyl)-3,3,3-trifluoropropoxy)-2-thioxo-2,3-dihydroquinazolin-4(1H)-one **14a**

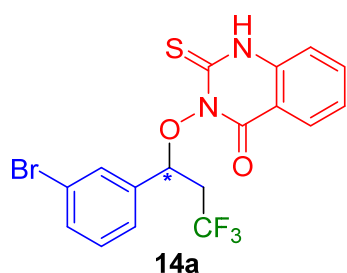

White solid; Yield 4.3% (7.4 mg for 0.4 mmol scale in acetone/*i*-PrOH

0.5/4 mL, 48 h); Data for **14a**: <sup>1</sup>H NMR (400 MHz, CDCl<sub>3</sub>) δ 9.83 (s, 1H),

8.09 (d, *J* = 7.8 Hz, 1H), 7.71 (t, *J* = 1.6 Hz, 1H), 7.67-7.63 (m, 1H),

7.49-7.45 (m, 2H), 7.26 (t, *J* = 7.8 Hz, 1H), 7.21 (t, *J* = 7.8 Hz, 1H), 7.09

(d, *J* = 8.0 Hz, 1H), 5.71 (t, *J* = 6.6 Hz, 1H), 3.26-3.13 (m, 1H), 2.89-

2.76 (m, 1H); <sup>13</sup>C NMR (100 MHz, CDCl<sub>3</sub>) δ 159.4, 149.9, 138.2, 137.5, 135.5, 132.9, 131.4, 130.0,

128.5, 127.0, 125.0 (q, <sup>1</sup>*J*<sub>C-F</sub> = 275.3 Hz), 123.9, 122.4, 115.4, 114.6, 81.1, 39.2 (q, <sup>2</sup>*J*<sub>C-F</sub> = 28.8 Hz);

<sup>19</sup>F NMR (471 Hz, CDCl<sub>3</sub>) δ -63.1 (s, 3F); TLC *R*<sub>f</sub> 0.25 (EtOAc/hexanes, 1/2); HRMS (FD) Calcd for

C<sub>17</sub>H<sub>12</sub>BrF<sub>3</sub>N<sub>2</sub>O<sub>2</sub>S: 443.9798, found: 443.9803; HPLC analysis from racemic product: *t*<sub>R</sub> 12.7 min (*S*),

18.3 min (*R*) (Chiralpak AD-H, *i*-PrOH/hexane, 14/86, 0.8 ml/min, λ = 254 nm). For the reaction

catalyzed by **V(O)-1**: *t*<sub>R</sub> 12.7 min (minor, 20.0%), 18.3 min (major, 80.0%) for 60% ee (*R*); [α]<sub>D</sub><sup>25</sup> +90.0

(*c*, 0.06, CHCl<sub>3</sub>) for 60% ee (*R*). For racemic synthesis catalyzed by V(O)(acac)<sub>2</sub> in CH<sub>3</sub>CN: 7.4%

yield (13.2 mg, 30h).

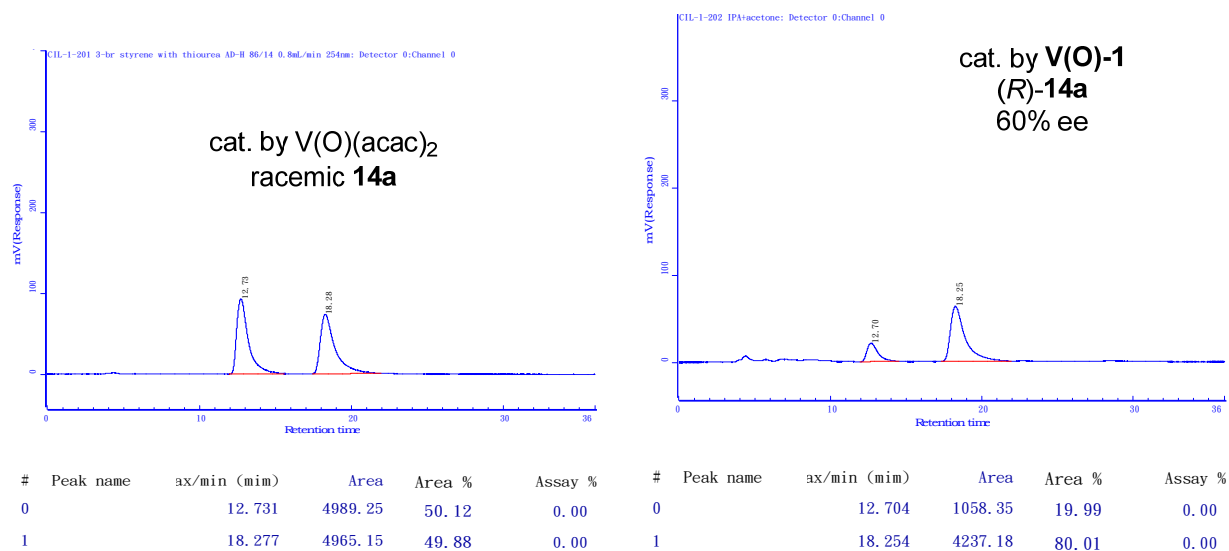

**Figure S1:** X-ray crystal structure of (*R*)-**12a** (CCDC 2215699) in Platon drawing (ellipsoids are shown at 50% probability level)

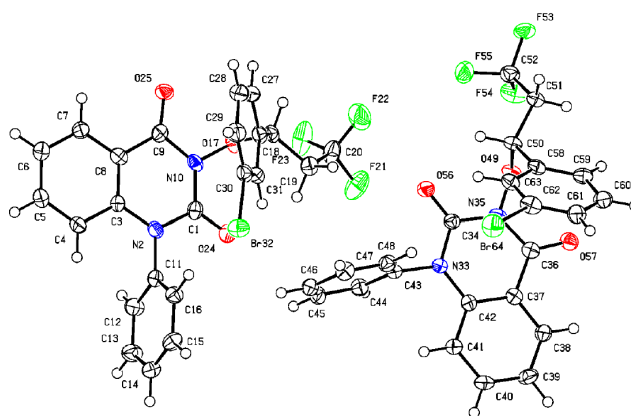

**Table S1** Crystal data and structure refinement for (*R*)-**12a** (2208117lt2\_auto).

|                     |                                                                                              |
|---------------------|----------------------------------------------------------------------------------------------|
| Identification code | 2208117lt2_auto                                                                              |
| Empirical formula   | C <sub>46</sub> H <sub>32</sub> Br <sub>2</sub> F <sub>6</sub> N <sub>4</sub> O <sub>6</sub> |
| Formula weight      | 1010.57                                                                                      |
| Temperature/K       | 100.01(10)                                                                                   |
| Crystal system      | monoclinic                                                                                   |
| Space group         | P2 <sub>1</sub>                                                                              |
| a/Å                 | 10.22560(11)                                                                                 |
| b/Å                 | 20.67971(18)                                                                                 |
| c/Å                 | 10.38564(11)                                                                                 |
| α/°                 | 90                                                                                           |
| β/°                 | 110.7384(12)                                                                                 |

|                                                |                                                                    |
|------------------------------------------------|--------------------------------------------------------------------|
| $\gamma/^\circ$                                | 90                                                                 |
| Volume/ $\text{\AA}^3$                         | 2053.88(4)                                                         |
| Z                                              | 2                                                                  |
| $\rho_{\text{calc}}/\text{g}/\text{cm}^3$      | 1.634                                                              |
| $\mu/\text{mm}^{-1}$                           | 3.239                                                              |
| F(000)                                         | 1016.0                                                             |
| Crystal size/ $\text{mm}^3$                    | $0.14 \times 0.09 \times 0.03$                                     |
| Radiation                                      | Cu K $\alpha$ ( $\lambda = 1.54184$ )                              |
| 2 $\theta$ range for data collection/ $^\circ$ | 8.552 to 134.146                                                   |
| Index ranges                                   | $-11 \leq h \leq 12$ , $-24 \leq k \leq 24$ , $-12 \leq l \leq 12$ |
| Reflections collected                          | 23889                                                              |
| Independent reflections                        | 7328 [ $R_{\text{int}} = 0.0235$ , $R_{\text{sigma}} = 0.0223$ ]   |
| Data/restraints/parameters                     | 7328/1/577                                                         |
| Goodness-of-fit on $F^2$                       | 1.031                                                              |
| Final R indexes [ $ I  \geq 2\sigma(I)$ ]      | $R_1 = 0.0378$ , $wR_2 = 0.1058$                                   |
| Final R indexes [all data]                     | $R_1 = 0.0384$ , $wR_2 = 0.1065$                                   |
| Largest diff. peak/hole / $\text{e \AA}^{-3}$  | 1.99/-0.55                                                         |
| Flack parameter                                | -0.016(8)                                                          |

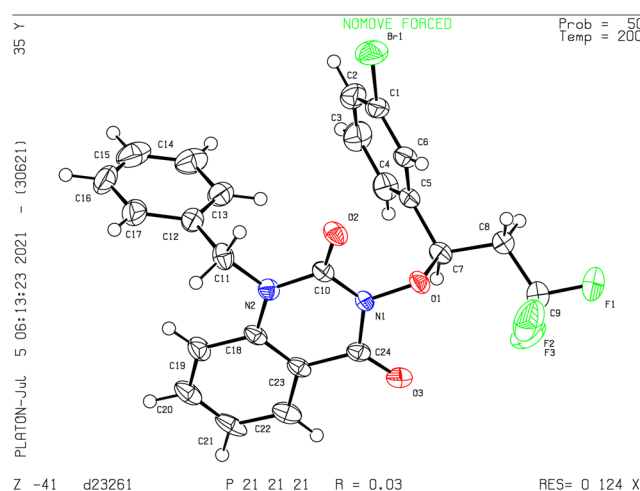

**Figure S2.** X-ray crystal structure of (*R*)-**13a** (CCDC 2094844) in Platon drawing (ellipsoids are shown at 50% probability level)

Selected data for X-ray crystal structure of (*R*)-**13a**



**Crystal data and structural refinement for (R)-13a:** C<sub>24</sub>H<sub>18</sub>BrF<sub>3</sub>N<sub>2</sub>O<sub>3</sub>, *Mr* = 519.3, prism, space group P 2<sub>1</sub> 2<sub>1</sub> 2<sub>1</sub>, *a* = 9.0260(3) Å, *b* = 13.0929(5) Å, *c* = 18.3842(7) Å,  $\alpha$  = 90.0,  $\beta$  = 90,  $\gamma$  = 90, *V* = 2172.58(14) Å<sup>3</sup>, *Z* = 4,  $\rho_{\text{calcd}}$  = 1.588 Mg m<sup>-3</sup>, *T* = 200(2) K, Bruker Kappa CCD diffractometer, Mo K $\alpha$  radiation ( $\lambda$  = 0.71073),  $\mu$  = 1.948 mm<sup>-1</sup>. The structure was solved by SHELXL-86 (Sheldrick, 1986) Solver. All non-hydrogen atoms were refined anisotropically (SHELXS-97; Sheldrick, 1997). Final block-diagonal matrix least-square refinement on *F*<sup>2</sup> with all 3835 reflections and 298 variables converged to *R*1 (*I* > 2 $\sigma$ (*I*)) = 0.0327, *wR*2 (all data) = 0.0759 and GOF = 0.940. Absolute structure parameter 0.023(8).

### EGFR-TK inhibition results:

Preliminary EGFR-TK inhibition test results for our compounds at single point analyses at 1  $\mu$ M concentrations are attached at the end. These results are compiled as a Table in SI as shown below: Project #: SSBK13429\_63766 (samples 1-15; on Oct. 28); SSBK13429\_64251 (sample 1 on Dec. 16); Test Compound Concentration: 1,000 nM; [ATP] Tested: Km app  
Kinase Tested: EGFR (ErbB1); Kinase lot#: PV3872/2281133

**Table S2:** EGFR-TK inhibition results

| Sample name | structure                                                                           | Sample number in the paper       | % Inhibition Point 1/point 2 | % inhibition mean |
|-------------|-------------------------------------------------------------------------------------|----------------------------------|------------------------------|-------------------|
| sample1     | 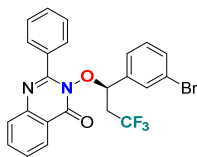 | (R)- <b>9a</b><br>(S)- <b>9a</b> | -3/-2                        | -3<br>-3          |
| sample2     |  | Racemic- <b>9a</b>               | 0/-5                         | -3                |
| sample3     |  | (R)- <b>9b</b><br>(S)- <b>9b</b> | -4/-6                        | -5<br>-10         |

|          |                                                                                     |                                                      |               |                      |
|----------|-------------------------------------------------------------------------------------|------------------------------------------------------|---------------|----------------------|
| sample4  | 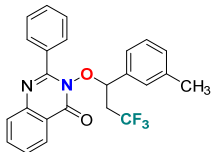   | Racemic- <b>9b</b>                                   | -8/-7         | -8                   |
| sample5  |    | ( <i>R</i> )- <b>9c</b><br>( <i>S</i> )- <b>9c</b>   | -2/-2         | -2<br>-2             |
| sample6  |    | Racemic- <b>9c</b>                                   | -3/-2         | -2                   |
| sample7  |    | Racemic- <b>12a</b>                                  | 0/-1          | -1                   |
| sample8  |   | ( <i>R</i> )- <b>12a</b><br>( <i>S</i> )- <b>12a</b> | -5/-3         | -4<br>2 (predicted)  |
| sample9  |  | Racemic- <b>12b</b>                                  | -5/-5         | -5                   |
| sample10 |  | ( <i>R</i> )- <b>12b</b><br>( <i>S</i> )- <b>12b</b> | -17/1<br>---- | -8<br>-2 (predicted) |
| sample11 |  | Racemic- <b>12c</b>                                  | -5/-4         | -4                   |
| sample12 |  | ( <i>R</i> )- <b>12c</b><br>( <i>S</i> )- <b>12b</b> | -6/-3         | -4<br>-4             |

|          |                                                                                   |                                                        |       |          |
|----------|-----------------------------------------------------------------------------------|--------------------------------------------------------|-------|----------|
| sample13 | 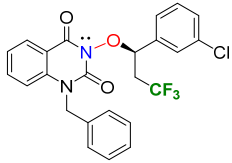 | ( <i>R</i> )- <b>13a'</b>                              | -4/-2 | -3       |
| sample14 |  | Racemic- <b>11a'</b>                                   | -4/1  | -1       |
| sample15 |  | ( <i>R</i> )- <b>11a'</b><br>( <i>S</i> )- <b>11a'</b> | -4/2  | -1<br>-1 |
| sample 1 |  | ( <i>R</i> )- <b>10a</b>                               | 3/5   | 4        |

The data in green are calculated from the data of the (*R*) and racemic products. In general, EGFR-TK inhibition activity profile is in the order of (*S*) 1-Ph (IC<sub>50</sub>: 25 μM) > 2-H > 2-Ph in the quinazoline moieties and in the order of *m*-Cl/Br > *p*-Me > *m*-Me in the styrene substrate units. Notably, (*R*)-**10a** (2-SMe and *m*-Br) showed discernible EGFR-TK inhibition activity whose IC<sub>50</sub> is estimated to be around 10-12.5 μM.

### Experimental References:

- (S1) (a) Deore, R. R.; Chen, G. S.; Chang, P.-T.; Chern, T.-R.; Lai, S.-Y.; Chuang, M.-H.; Lin, J.-H.; Kung, F.-L.; Chen, C.-S.; Chiou, C.-T.; Chern, J.-W. Discovery of *N*-Arylalkyl-3-hydroxy-4-oxo-3,4-dihydroquinazolin-2-carboxamide Derivatives as HCV NS5B Polymerase Inhibitors. *ChemMedChem* **2012**, 7, 850–860. (b) Tanaka, K.; Matsuo, K.; Nakanishi, A.; Kataoka, Y.; Takase, K.; Otsuki, S. *Chem. & Pharm. Bull.* **1988**, 36, 2323–2330.
- (S2) Cheng, R.; Guo, T.; Zhang-Negrerie, D.; Du, Y.; Zhao, K. One-Pot Synthesis of Quinazolinones From Anthranilamides And Aldehydes via *P*-Toluenesulfonic Acid Catalyzed Cyclocondensation and Phenyliodine Diacetate Mediated Oxidative Dehydrogenation. *Synthesis* **2013**, 45, 2998–3006.
- (S3) (a) Falsini, M.; Squarcialupi, L.; Catarzi, D.; Varano, F.; Betti, M.; Di Cesare Mannelli, L.; Tenci, B.; Ghelardini, C.; Tanc, M.; Angeli, A.; Supuran, C. T.; Colotta, V. 3-Hydroxy-1H-quinazoline-2,4-

dione as a new scaffold to develop potent and selective inhibitors of the tumor-associated carbonic anhydrases IX and XII. *J. Med. Chem.* **2017**, *60*, 6428–6439. (b) Kang, D.; Zhang, H.; Zhou, Z.; Huang, B.; Naesens, L.; Zhan, P.; Liu, X. First Discovery of Novel 3-Hydroxy-Quinazoline-2,4(1H,3H)-Diones as Specific Anti-Vaccinia And Adenovirus Agents via ‘Privileged Scaffold’ Refining Approach. *Bioorg. Med. Chem. Lett.* **2016**, *26*, 5182–5186.

(S4) (a) Geffken, D.; Koellner, M. A. Oxalylierung Von *N*-Phenylanthranilo-*O*-Alkylhydroxamsäuren zu 4-Alkoxy-2,3,4,5-Tetrahydro-1H-1,4-Benzodiazepin-2,3,5-Trionen. *Z. für Naturforsch. – B: Chem. Sci.* **2005**, *60*, 337–340. (b) Domagala, John Michael; Ellsworth, Edmund L.; Huang, L.; Renau, T. E.; Singh, R.; Stier, M. A. WO9921840 A1 **1999**.

(S5) Tang, J.; Maddali, K.; Dreis, C. D.; Sham, Y. Y.; Vince, R.; Pommier, Y.; Wang, Z. 3-Hydroxypyrimidine-2,4-diones as an Inhibitor Scaffold of HIV Integrase. *J. Med. Chem.* **2011**, *2*, 63–67.

(S6) Khokhlov, P. S.; Osipov, V. N.; Roshchin, A.V. 3-Hydroxy- and 3-Alkoxy-2-Sulfanylquinazolin-4(3H)-Ones: Synthesis and Reactions with Alkylating and Acylating Agents. *Russ. Chem. Bull.* **2011**, *60*, 153–156.

### Theoretical calculation:

Optimized geometry: The structure of a chemical sample corresponding to an energy minimum by using Scigress program. The structure of the chemical sample is refined by performing an optimize geometry calculation in Mechanics using Augmented MM3 parameters. The sandwich structure optimizations were done by performing an optimize geometry calculation in Mechanics using Augmented MM2 parameters.

### Representative Cartesian coordinates

Figure S4

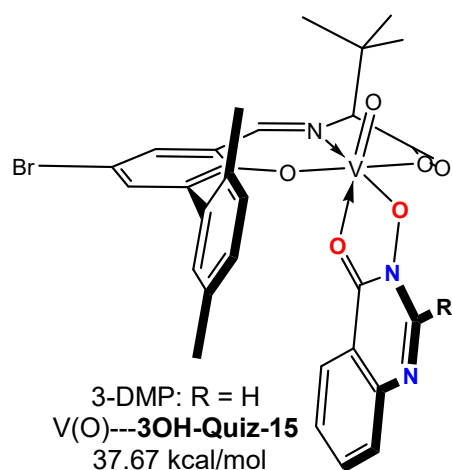

Total number of atoms: 67 for 3-DMP: R = H: V(O)---3OH-Quiz-15

|    |    |         |          |           |
|----|----|---------|----------|-----------|
| O  | 1  | 6.73873 | -6.11915 | -2.10071  |
| Br | 2  | 3.88336 | -8.26748 | -9.22057  |
| V  | 3  | 5.55584 | -5.10638 | -2.78859  |
| O  | 4  | 4.74563 | -4.81818 | -1.03396  |
| O  | 5  | 2.73769 | -5.11288 | -0.073871 |
| O  | 6  | 6.39121 | -5.39113 | -4.52495  |
| N  | 7  | 4.24996 | -6.56281 | -2.92489  |
| H  | 8  | 5.852   | -8.29955 | -1.2635   |
| H  | 9  | 2.35456 | -9.28569 | -2.24777  |
| H  | 10 | 2.38779 | -6.76036 | -2.07229  |
| H  | 11 | 3.09999 | -7.8136  | -4.0403   |
| H  | 12 | 3.19443 | -8.18126 | -6.34802  |
| H  | 13 | 5.42615 | -7.32532 | 0.18678   |
| H  | 14 | 2.97377 | -7.3866  | 1.04438   |
| H  | 15 | 1.66333 | -7.98343 | -0.029932 |
| H  | 16 | 2.77054 | -9.13702 | 0.774775  |
| H  | 17 | 4.10056 | -9.41344 | -2.66628  |
| H  | 18 | 3.46182 | -10.2591 | -1.23456  |

|   |    |          |           |           |
|---|----|----------|-----------|-----------|
| H | 19 | 6.19221  | -6.42207  | -8.89175  |
| H | 20 | 5.25227  | -9.10562  | 0.212011  |
| C | 21 | 3.59611  | -5.52296  | -0.822372 |
| C | 22 | 5.12598  | -8.20318  | -0.427088 |
| C | 23 | 2.72266  | -8.14558  | 0.27112   |
| C | 24 | 3.38269  | -9.31685  | -1.82225  |
| C | 25 | 3.95095  | -7.11369  | -4.03839  |
| C | 26 | 4.62273  | -6.88652  | -5.34354  |
| C | 27 | 3.6782   | -8.0794   | -0.944277 |
| C | 28 | 3.45169  | -6.75014  | -1.73742  |
| C | 29 | 4.08148  | -7.53685  | -6.46117  |
| C | 30 | 4.64213  | -7.37893  | -7.72423  |
| C | 31 | 5.75126  | -6.56021  | -7.89083  |
| C | 32 | 6.31486  | -5.91395  | -6.79087  |
| C | 33 | 5.76929  | -6.09106  | -5.50975  |
| O | 34 | 4.258    | -3.8774   | -3.57387  |
| O | 35 | 6.71952  | -3.55148  | -2.59304  |
| C | 36 | 4.6695   | -2.74358  | -3.61814  |
| N | 37 | 5.92263  | -2.4335   | -3.15244  |
| C | 38 | 7.47458  | -5.01892  | -7.00436  |
| C | 39 | 6.35527  | -1.09525  | -3.24398  |
| C | 40 | 4.49912  | -0.339831 | -4.14949  |
| C | 41 | 3.89948  | -1.60773  | -4.15365  |
| C | 42 | 3.76651  | 0.73737   | -4.65308  |
| C | 43 | 2.47318  | 0.557795  | -5.14737  |
| C | 44 | 1.89138  | -0.70907  | -5.14352  |
| C | 45 | 2.60503  | -1.79728  | -4.64483  |
| H | 46 | 7.37567  | -0.942876 | -2.85604  |
| H | 47 | 4.21717  | 1.74361   | -4.65808  |
| H | 48 | 1.90955  | 1.42079   | -5.54059  |
| H | 49 | 0.868394 | -0.849741 | -5.53183  |
| H | 50 | 2.14642  | -2.80031  | -4.63705  |
| N | 51 | 5.68208  | -0.114375 | -3.70937  |
| C | 52 | 7.29566  | -3.85883  | -7.76375  |
| C | 53 | 8.34269  | -2.96225  | -7.98823  |
| C | 54 | 9.59455  | -3.24314  | -7.44061  |
| C | 55 | 9.79019  | -4.40125  | -6.69104  |
| C | 56 | 8.74199  | -5.30137  | -6.46908  |

|   |    |         |          |          |
|---|----|---------|----------|----------|
| C | 57 | 8.10482 | -1.71742 | -8.80445 |
| H | 58 | 10.4378 | -2.55187 | -7.60355 |
| C | 59 | 9.02943 | -6.56034 | -5.68687 |
| H | 60 | 6.30066 | -3.63662 | -8.18324 |
| H | 61 | 10.7891 | -4.61089 | -6.27381 |
| H | 62 | 7.89738 | -1.97553 | -9.86683 |
| H | 63 | 7.23247 | -1.14568 | -8.41637 |
| H | 64 | 8.98177 | -1.03276 | -8.79149 |
| H | 65 | 8.32179 | -7.38275 | -5.9306  |
| H | 66 | 8.96754 | -6.36925 | -4.59251 |
| H | 67 | 10.0514 | -6.94551 | -5.90026 |

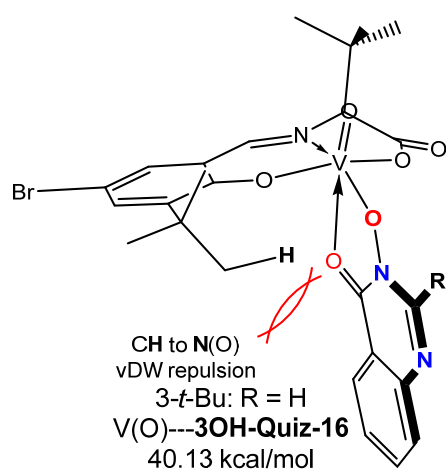

Total number of atoms: 63; for 3-*t*-Bu: R = H: **V(O)---3OH-Quiz-16**

|    |    |            |          |           |
|----|----|------------|----------|-----------|
| O  | 1  | -9.659336  | 1.797626 | 2.127046  |
| Br | 2  | -16.811954 | 2.813393 | -1.338457 |
| V  | 3  | -10.024867 | 0.893162 | 0.732303  |
| O  | 4  | -8.194422  | 1.113654 | 0.081715  |
| O  | 5  | -7.132976  | 2.020316 | -1.678004 |
| O  | 6  | -11.844519 | 0.703528 | 1.406472  |
| N  | 7  | -10.377574 | 2.494479 | -0.337559 |
| C  | 8  | -8.043286  | 2.069887 | -0.881647 |
| C  | 9  | -8.322933  | 4.41988  | 1.090048  |
| C  | 10 | -7.586466  | 5.032671 | -1.221773 |
| C  | 11 | -9.918575  | 5.505432 | -0.490072 |
| C  | 12 | -11.558538 | 2.820453 | -0.698855 |
| C  | 13 | -12.830293 | 2.196559 | -0.248407 |
| C  | 14 | -8.766082  | 4.480191 | -0.386292 |
| C  | 15 | -9.201025  | 3.079991 | -0.931968 |

|   |    |            |           |           |
|---|----|------------|-----------|-----------|
| C | 16 | -14.000412 | 2.661073  | -0.859163 |
| C | 17 | -15.241238 | 2.160993  | -0.491969 |
| C | 18 | -15.331261 | 1.183259  | 0.4902    |
| C | 19 | -14.183162 | 0.690297  | 1.128053  |
| C | 20 | -12.924117 | 1.222132  | 0.763367  |
| O | 21 | -10.431136 | -0.2242   | -0.816365 |
| O | 22 | -9.571693  | -0.768099 | 1.652041  |
| C | 23 | -10.23081  | -1.395096 | -0.601871 |
| N | 24 | -9.779994  | -1.815812 | 0.6242    |
| C | 25 | -14.321308 | -0.391773 | 2.203636  |
| C | 26 | -9.54327   | -3.192647 | 0.810356  |
| C | 27 | -10.145026 | -3.782419 | -1.221053 |
| C | 28 | -10.43529  | -2.462169 | -1.595965 |
| C | 29 | -10.331252 | -4.792923 | -2.166791 |
| C | 30 | -10.798673 | -4.498513 | -3.449008 |
| C | 31 | -11.08865  | -3.181832 | -3.80368  |
| C | 32 | -10.905783 | -2.158026 | -2.876093 |
| N | 33 | -9.716254  | -4.112544 | -0.058693 |
| C | 34 | -13.739633 | 0.089862  | 3.555184  |
| C | 35 | -15.791765 | -0.787494 | 2.494914  |
| C | 36 | -13.608381 | -1.691682 | 1.761671  |
| H | 37 | -11.131097 | -1.114866 | -3.154888 |
| H | 38 | -9.170927  | 4.164301  | 1.761477  |
| H | 39 | -7.517525  | 3.670506  | 1.255652  |
| H | 40 | -7.929108  | 5.402194  | 1.434899  |
| H | 41 | -7.825196  | 5.050329  | -2.308903 |
| H | 42 | -6.660305  | 4.431448  | -1.090322 |
| H | 43 | -7.330581  | 6.075302  | -0.927649 |
| H | 44 | -10.301892 | 5.592685  | -1.53123  |
| H | 45 | -10.774748 | 5.241586  | 0.169406  |
| H | 46 | -9.586818  | 6.522188  | -0.182268 |
| H | 47 | -11.648488 | 3.64261   | -1.426859 |
| H | 48 | -9.435288  | 3.225341  | -2.012648 |
| H | 49 | -13.947015 | 3.435373  | -1.641435 |
| H | 50 | -16.332149 | 0.807498  | 0.748641  |
| H | 51 | -10.104255 | -5.837379 | -1.895776 |
| H | 52 | -10.939057 | -5.309802 | -4.183485 |
| H | 53 | -11.459296 | -2.95002  | -4.816486 |





|    |    |           |           |           |
|----|----|-----------|-----------|-----------|
| N  | 19 | -0.978024 | 1.836481  | -3.240824 |
| Br | 20 | -8.191016 | -3.344698 | 0.839911  |
| C  | 21 | 0.57227   | 1.330851  | -1.454501 |
| C  | 22 | 0.439455  | 4.368686  | -1.947979 |
| C  | 23 | 2.606355  | 3.262997  | -2.51421  |
| C  | 24 | 1.064546  | 3.965614  | -4.32785  |
| C  | 25 | -1.380037 | 1.882501  | -4.4413   |
| C  | 26 | -2.607014 | 1.760899  | -4.996393 |
| C  | 27 | 1.115066  | 3.367838  | -2.90597  |
| C  | 28 | 0.447285  | 1.965094  | -2.844928 |
| C  | 29 | -2.656817 | 1.8912    | -6.392706 |
| C  | 30 | -3.854948 | 1.797678  | -7.098669 |
| C  | 31 | -5.03452  | 1.570184  | -6.396209 |
| C  | 32 | -4.994078 | 1.444126  | -5.006214 |
| C  | 33 | -3.797937 | 1.531715  | -4.271995 |
| O  | 34 | -1.868931 | -0.539922 | -2.102673 |
| O  | 35 | -3.51279  | 0.699949  | -0.4785   |
| C  | 36 | -2.251547 | -1.273195 | -1.217086 |
| N  | 37 | -3.044041 | -0.695229 | -0.237004 |
| C  | 38 | -6.174462 | 1.238622  | -4.399799 |
| C  | 39 | -3.419473 | -1.462329 | 0.804685  |
| C  | 40 | -2.408342 | -3.26334  | -0.011654 |
| C  | 41 | -1.939187 | -2.588434 | -1.145063 |
| C  | 42 | -2.120479 | -4.624293 | 0.126273  |
| C  | 43 | -1.379639 | -5.291969 | -0.852001 |
| C  | 44 | -0.918021 | -4.605627 | -1.977389 |
| C  | 45 | -1.195425 | -3.246047 | -2.129868 |
| N  | 46 | -3.094126 | -2.682599 | 0.883034  |
| C  | 47 | -6.867286 | 2.295804  | -3.795585 |
| C  | 48 | -8.088523 | 2.021544  | -3.172021 |
| C  | 49 | -8.62503  | 0.73292   | -3.177724 |
| C  | 50 | -7.96032  | -0.314431 | -3.818256 |
| C  | 51 | -6.731151 | -0.04388  | -4.425368 |
| C  | 52 | -8.567814 | -1.692262 | -3.84725  |
| C  | 53 | -6.333077 | 3.705674  | -3.839849 |
| H  | 54 | -7.892202 | -2.441526 | -4.318347 |
| H  | 55 | -4.882391 | 1.162736  | -2.080831 |
| H  | 56 | -6.902256 | -0.723401 | 0.57176   |

|   |    |           |           |           |
|---|----|-----------|-----------|-----------|
| H | 57 | -5.986737 | 1.193449  | 0.887213  |
| H | 58 | -6.947081 | 1.73214   | -0.537704 |
| H | 59 | -4.521606 | -1.127934 | -2.981567 |
| H | 60 | -5.292688 | -3.432693 | -3.238975 |
| H | 61 | -6.86685  | -4.417704 | -1.609138 |
| H | 62 | -0.614294 | 4.568442  | -2.243805 |
| H | 63 | 0.442709  | 4.002328  | -0.896904 |
| H | 64 | 0.96235   | 5.352095  | -1.95106  |
| H | 65 | 3.142196  | 2.523243  | -3.151534 |
| H | 66 | 2.739897  | 2.963288  | -1.451253 |
| H | 67 | 3.131147  | 4.239106  | -2.629262 |
| H | 68 | 1.513968  | 3.274428  | -5.076544 |
| H | 69 | 0.024028  | 4.204648  | -4.642832 |
| H | 70 | 1.629782  | 4.923645  | -4.389177 |
| H | 71 | -0.547039 | 2.03335   | -5.145631 |
| H | 72 | 1.022305  | 1.287944  | -3.522028 |
| H | 73 | -1.752899 | 2.073622  | -6.963361 |
| H | 74 | -5.981725 | 1.497601  | -6.919279 |
| H | 75 | -2.474434 | -5.172248 | 0.992253  |
| H | 76 | -1.16172  | -6.348062 | -0.736875 |
| H | 77 | -0.343075 | -5.130243 | -2.732139 |
| H | 78 | -0.834027 | -2.721139 | -3.005724 |
| H | 79 | -8.640527 | 2.81781   | -2.686658 |
| H | 80 | -9.578297 | 0.546479  | -2.696974 |
| H | 81 | -6.196482 | -0.841162 | -4.927229 |
| H | 82 | -9.516834 | -1.672597 | -4.429408 |
| H | 83 | -8.793596 | -2.037091 | -2.812983 |
| H | 84 | -6.453053 | 4.112106  | -4.869362 |
| H | 85 | -6.87544  | 4.380948  | -3.140091 |
| H | 86 | -5.252254 | 3.746264  | -3.580918 |
| H | 87 | -4.06846  | -1.06664  | 1.602237  |

Figure S6:

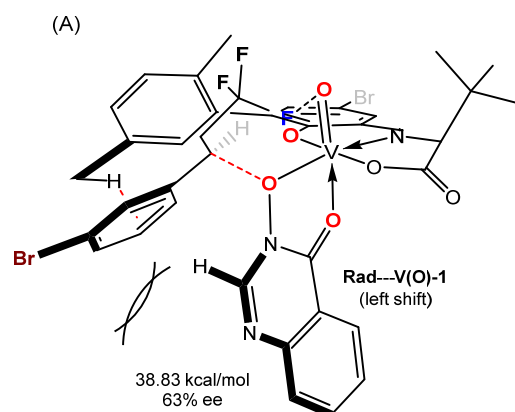

Total number of atoms: 87

|    |    |           |           |           |
|----|----|-----------|-----------|-----------|
| C  | 1  | -5.177653 | 1.902319  | 1.042077  |
| F  | 2  | -2.970765 | 2.909252  | 1.052562  |
| F  | 3  | -4.561733 | 3.833595  | 2.310054  |
| F  | 4  | -4.644022 | 4.059367  | 0.091208  |
| C  | 5  | -4.331493 | 3.170257  | 1.110632  |
| C  | 6  | -5.973427 | -0.889321 | -1.566698 |
| C  | 7  | -6.737866 | -2.047369 | -1.699604 |
| C  | 8  | -7.557589 | -2.465197 | -0.655267 |
| C  | 9  | -7.589864 | -1.72671  | 0.524952  |
| C  | 10 | -6.80275  | -0.582883 | 0.665369  |
| C  | 11 | -5.083438 | 1.119664  | -0.254032 |
| C  | 12 | -5.982646 | -0.144036 | -0.382744 |
| O  | 13 | -2.761431 | 2.925458  | -1.790743 |
| Br | 14 | -3.301081 | 1.169628  | -9.419549 |
| V  | 15 | -2.290487 | 1.313662  | -2.063241 |
| O  | 16 | -0.838594 | 1.473211  | -0.766726 |
| O  | 17 | 1.390706  | 1.220263  | -0.761856 |
| O  | 18 | -3.713376 | 1.170239  | -3.384536 |
| N  | 19 | -0.932572 | 1.871712  | -3.363285 |
| Br | 20 | -8.700614 | -2.287584 | 1.9586    |
| C  | 21 | 0.39672   | 1.619056  | -1.326402 |
| C  | 22 | -0.109343 | 4.579535  | -2.080081 |
| C  | 23 | 2.25156   | 3.757359  | -2.187932 |
| C  | 24 | 0.972794  | 4.136048  | -4.285071 |
| C  | 25 | -1.087563 | 1.780591  | -4.630266 |
| C  | 26 | -2.343682 | 1.462183  | -5.361091 |
| C  | 27 | 0.848426  | 3.62989   | -2.829231 |

|   |    |           |           |           |
|---|----|-----------|-----------|-----------|
| C | 28 | 0.358597  | 2.142185  | -2.772725 |
| C | 29 | -2.281726 | 1.448068  | -6.76112  |
| C | 30 | -3.413909 | 1.182073  | -7.524138 |
| C | 31 | -4.631179 | 0.946466  | -6.898403 |
| C | 32 | -4.722228 | 0.964046  | -5.506101 |
| C | 33 | -3.573215 | 1.205438  | -4.733595 |
| O | 34 | -1.781574 | -0.542542 | -2.366042 |
| O | 35 | -3.483822 | 0.619146  | -0.66319  |
| C | 36 | -2.205473 | -1.278915 | -1.510441 |
| N | 37 | -3.039482 | -0.804232 | -0.529433 |
| C | 38 | -6.044128 | 0.728671  | -4.881599 |
| C | 39 | -3.346966 | -1.681433 | 0.535467  |
| C | 40 | -2.342338 | -3.436572 | -0.325137 |
| C | 41 | -1.86543  | -2.708655 | -1.42305  |
| C | 42 | -2.024023 | -4.794262 | -0.245392 |
| C | 43 | -1.252361 | -5.409337 | -1.232775 |
| C | 44 | -0.781749 | -4.669547 | -2.316704 |
| C | 45 | -1.088618 | -3.313786 | -2.414103 |
| N | 46 | -3.043967 | -2.920323 | 0.614399  |
| C | 47 | -6.682435 | 1.715229  | -4.112378 |
| C | 48 | -7.933028 | 1.43693   | -3.550711 |
| C | 49 | -8.565891 | 0.216946  | -3.779465 |
| C | 50 | -7.960782 | -0.751359 | -4.580561 |
| C | 51 | -6.69908  | -0.484823 | -5.1169   |
| C | 52 | -8.651676 | -2.063584 | -4.853825 |
| C | 53 | -6.10414  | 3.098564  | -3.930474 |
| H | 54 | -7.920858 | -2.888453 | -5.010155 |
| H | 55 | -5.295143 | 1.806348  | -1.096858 |
| H | 56 | -6.84295  | -0.029093 | 1.615678  |
| H | 57 | -4.885292 | 1.244283  | 1.891765  |
| H | 58 | -6.239852 | 2.193225  | 1.21278   |
| H | 59 | -5.333871 | -0.577583 | -2.407634 |
| H | 60 | -6.692131 | -2.631391 | -2.633885 |
| H | 61 | -8.170748 | -3.374824 | -0.766074 |
| H | 62 | -1.105189 | 4.629509  | -2.572172 |
| H | 63 | -0.26566  | 4.26865   | -1.023175 |
| H | 64 | 0.287653  | 5.619461  | -2.057201 |
| H | 65 | 2.97502   | 3.0409    | -2.63831  |

|   |    |           |           |           |
|---|----|-----------|-----------|-----------|
| H | 66 | 2.231741  | 3.574825  | -1.090854 |
| H | 67 | 2.673133  | 4.777919  | -2.329002 |
| H | 68 | 1.621894  | 3.471478  | -4.898727 |
| H | 69 | -0.01652  | 4.215054  | -4.787817 |
| H | 70 | 1.423278  | 5.152915  | -4.322304 |
| H | 71 | -0.202502 | 1.978162  | -5.255194 |
| H | 72 | 1.101838  | 1.537734  | -3.344429 |
| H | 73 | -1.327081 | 1.651092  | -7.274045 |
| H | 74 | -5.53253  | 0.757733  | -7.503058 |
| H | 75 | -2.387805 | -5.387021 | 0.610518  |
| H | 76 | -1.010787 | -6.483027 | -1.152109 |
| H | 77 | -0.167806 | -5.154812 | -3.094723 |
| H | 78 | -0.71965  | -2.72558  | -3.271195 |
| H | 79 | -8.44139  | 2.199773  | -2.938387 |
| H | 80 | -9.558398 | 0.026392  | -3.339068 |
| H | 81 | -6.207588 | -1.24997  | -5.739191 |
| H | 82 | -9.282713 | -1.992198 | -5.767596 |
| H | 83 | -9.310847 | -2.363984 | -4.008732 |
| H | 84 | -6.905805 | 3.867318  | -3.866801 |
| H | 85 | -5.507667 | 3.164804  | -2.994903 |
| H | 86 | -5.446627 | 3.394635  | -4.777104 |
| H | 87 | -3.938663 | -1.208005 | 1.334146  |

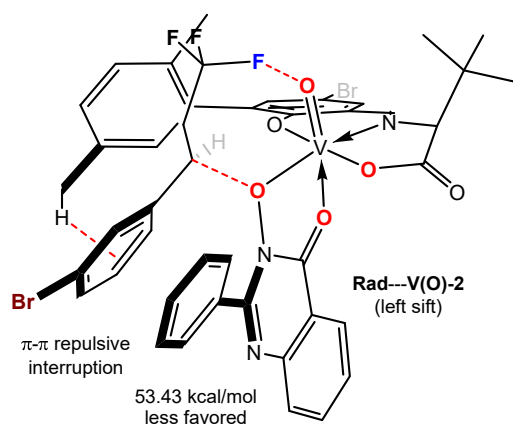

Total number of atoms: 97

|   |   |           |          |          |
|---|---|-----------|----------|----------|
| C | 1 | -5.564381 | 1.485704 | 0.709957 |
| F | 2 | -3.364533 | 2.363022 | 1.230627 |
| F | 3 | -5.136449 | 3.299977 | 2.206512 |
| F | 4 | -4.758064 | 3.662077 | 0.038043 |
| C | 5 | -4.696743 | 2.696945 | 1.033911 |

|    |    |           |            |           |
|----|----|-----------|------------|-----------|
| C  | 6  | -5.924359 | -1.193834  | -2.081838 |
| C  | 7  | -6.686773 | -2.320358  | -2.386762 |
| C  | 8  | -7.668214 | -2.757909  | -1.502072 |
| C  | 9  | -7.871647 | -2.066     | -0.31101  |
| C  | 10 | -7.089233 | -0.954618  | 0.003196  |
| C  | 11 | -5.188298 | 0.716542   | -0.543951 |
| C  | 12 | -6.095687 | -0.503854  | -0.876449 |
| O  | 13 | -2.757883 | 2.684904   | -1.552092 |
| Br | 14 | -2.888106 | 1.54862    | -9.390789 |
| V  | 15 | -2.314274 | 1.107889   | -2.007612 |
| O  | 16 | -0.918541 | 1.067647   | -0.642365 |
| O  | 17 | 1.311816  | 0.838822   | -0.557352 |
| O  | 18 | -3.670677 | 1.174605   | -3.404236 |
| N  | 19 | -0.891814 | 1.799739 - | .166957   |
| Br | 20 | -9.205086 | -2.651891  | 0.906701  |
| C  | 21 | 0.340045  | 1.295696   | -1.116277 |
| C  | 22 | -0.145665 | 4.329488   | 1.491221  |
| C  | 23 | 2.221829  | 3.537865   | -1.635502 |
| C  | 24 | 0.997223  | 4.176736   | -3.703648 |
| C  | 25 | -0.972066 | 1.828202   | -4.443873 |
| C  | 26 | -2.180999 | 1.572638   | -5.27172  |
| C  | 27 | 0.839212  | 3.487297   | -2.329211 |
| C  | 28 | 0.364363  | 2.002102   | -2.482342 |
| C  | 29 | -2.032661 | 1.64737    | -6.662962 |
| C  | 30 | -3.117872 | 1.44793    | -7.509254 |
| C  | 31 | -4.37489  | 1.194282   | -6.97566  |
| C  | 32 | -4.551785 | 1.126474   | -5.592817 |
| C  | 33 | -3.450146 | 1.299321   | -4.737563 |
| O  | 34 | -1.883437 | -0.725004  | -2.488624 |
| O  | 35 | -3.5307   | 0.203354   | -0.766853 |
| C  | 36 | -2.368796 | -1.567574  | -1.77041  |
| N  | 37 | -3.194382 | -1.264     | -0.705904 |
| C  | 38 | -5.912626 | 0.876553   | -5.065081 |
| C  | 39 | -3.660195 | -2.313022  | 0.131126  |
| C  | 40 | -2.803289 | -3.910693  | -1.142537 |
| C  | 41 | -2.169669 | -3.006987  | -2.001845 |
| C  | 42 | -2.640452 | -5.276477  | -1.38398  |
| C  | 43 | -1.87466  | -5.729317  | -2.459898 |

|   |    |           |           |           |
|---|----|-----------|-----------|-----------|
| C | 44 | -1.250355 | -4.815966 | -3.307644 |
| C | 45 | -1.400354 | -3.44923  | -3.081912 |
| N | 46 | -3.487868 | -3.556219 | -0.121335 |
| C | 47 | -6.572239 | 1.813522  | -4.252314 |
| C | 48 | -7.855318 | 1.51992   | -3.777594 |
| C | 49 | -8.501781 | 0.341329  | -4.142478 |
| C | 50 | -7.877964 | -0.568647 | -4.996116 |
| C | 51 | -6.581848 | -0.293616 | -5.439285 |
| C | 52 | -8.590749 | -1.825237 | -5.427688 |
| C | 53 | -5.985195 | 3.16861   | -3.935778 |
| H | 54 | -7.876559 | -2.644384 | -5.666575 |
| H | 55 | -5.282001 | 1.433121  | -1.381474 |
| H | 56 | -7.264303 | -0.443657 | 0.962232  |
| H | 57 | -5.536215 | 0.804124  | 1.586398  |
| H | 58 | -6.619132 | 1.835384  | 0.62169   |
| H | 59 | -5.157364 | -0.863999 | -2.800755 |
| H | 60 | -6.511542 | -2.862541 | -3.331121 |
| H | 61 | -8.275171 | -3.645112 | -1.746343 |
| H | 62 | -1.120565 | 4.456512  | -2.009909 |
| H | 63 | -0.344256 | 3.873909  | -0.495816 |
| H | 64 | 0.252147  | 5.352382  | -1.306308 |
| H | 65 | 2.965776  | 2.892764  | -2.154556 |
| H | 66 | 2.171783  | 3.209823  | -0.574122 |
| H | 67 | 2.63568   | 4.571167  | -1.6262   |
| H | 68 | 1.682588  | 3.610161  | -4.373063 |
| H | 69 | 0.023503  | .295023   | -4.227972 |
| H | 70 | 1.421523  | .20021    | -3.597057 |
| H | 71 | -0.054621 | 2.088043  | -4.995891 |
| H | 72 | 1.142119  | 1.48058   | -3.088166 |
| H | 73 | -1.0456   | 1.866973  | -7.101464 |
| H | 74 | -5.239335 | 1.058307  | -7.646292 |
| H | 75 | -3.117578 | -6.006139 | -0.709145 |
| H | 76 | -1.75598  | -6.812172 | -2.634687 |
| H | 77 | -0.641791 | -5.172775 | -4.155775 |
| H | 78 | -0.916301 | -2.723736 | -3.75736  |
| H | 79 | -8.378928 | 2.242804  | -3.130284 |
| H | 80 | -9.520418 | 0.140134  | -3.771618 |
| H | 81 | -6.075735 | -1.017051 | -6.099307 |



|   |    |           |           |           |
|---|----|-----------|-----------|-----------|
| H | 82 | -9.203529 | -1.635989 | -6.336997 |
| H | 83 | -9.271204 | -2.204154 | -4.632856 |
| H | 84 | -6.775806 | 3.950376  | -3.894948 |
| H | 85 | -5.471928 | 3.165782  | -2.949719 |
| H | 86 | -5.251371 | 3.501225  | -4.702249 |
| C | 87 | -4.207879 | -1.949712 | 1.461653  |
| C | 88 | -5.254284 | -2.690653 | 2.023282  |
| C | 89 | -3.649034 | -0.90351  | 2.205455  |
| C | 90 | -4.153226 | -0.578511 | 3.464807  |
| C | 91 | -5.222004 | -1.297918 | 3.995487  |
| C | 92 | -5.769866 | -2.35728  | 3.275288  |
| H | 93 | -5.688098 | -3.540437 | 1.469732  |
| H | 94 | -2.788517 | -0.337752 | 1.809723  |
| H | 95 | -3.70176  | 0.245946  | 4.042523  |
| H | 96 | -5.622947 | -1.039596 | 4.990028  |
| H | 97 | -6.607052 | -2.937762 | 3.698472  |

(B)

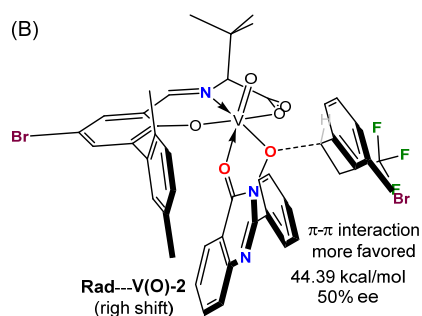

Total Number of atoms: 97

|    |    |           |           |           |
|----|----|-----------|-----------|-----------|
| C  | 1  | -3.313861 | -0.209945 | 1.344002  |
| F  | 2  | -2.221362 | 1.54134   | 2.607276  |
| F  | 3  | -2.20087  | -0.529668 | 3.446342  |
| F  | 4  | -4.091808 | 0.656716  | 3.465168  |
| C  | 5  | -2.96129  | 0.371227  | 2.71181   |
| C  | 6  | -6.320236 | 2.059818  | 0.30834   |
| C  | 7  | -7.672875 | 2.27588   | 0.570482  |
| C  | 8  | -8.385932 | 1.362694  | 1.34356   |
| C  | 9  | -7.740218 | 0.232374  | 1.840635  |
| C  | 10 | -6.391073 | 0.009545  | 1.562316  |
| C  | 11 | -4.147727 | 0.748618  | 0.51003   |
| C  | 12 | -5.660743 | 0.924887  | 0.794054  |
| O  | 13 | -3.44534  | 2.795704  | -2.021493 |
| Br | 14 | -1.810859 | 0.10389   | -9.462666 |

|    |    |           |           |           |
|----|----|-----------|-----------|-----------|
| V  | 15 | -2.598568 | 1.336411  | -2.247229 |
| O  | 16 | -1.433588 | 1.726329  | -0.728188 |
| O  | 17 | 0.733793  | 2.117919  | -0.303938 |
| O  | 18 | -3.716918 | 0.991081  | -3.799788 |
| N  | 19 | -1.181359 | 2.19854   | -3.293337 |
| Br | 20 | -8.704347 | -1.011537 | 2.90426   |
| C  | 21 | -0.209468 | 2.234422  | -1.053373 |
| C  | 22 | -1.266481 | 5.012087  | -1.943564 |
| C  | 23 | 1.210201  | 4.786354  | -1.672861 |
| C  | 24 | 0.211286  | 4.855993  | -3.949756 |
| C  | 25 | -1.040463 | 2.007961  | -4.55245  |
| C  | 26 | -1.976937 | 1.285727  | -5.456647 |
| C  | 27 | -0.006089 | 4.329226  | -2.513039 |
| C  | 28 | -0.124317 | 2.769355  | -2.492965 |
| C  | 29 | -1.568939 | 1.067149  | -6.779208 |
| C  | 30 | -2.39199  | 0.396413  | -7.679429 |
| C  | 31 | -3.635839 | -0.069377 | -7.270283 |
| C  | 32 | -4.065961 | 0.149893  | -5.9622   |
| C  | 33 | -3.250812 | 0.849329  | -5.063346 |
| O  | 34 | -1.696127 | -0.374856 | -2.4726   |
| O  | 35 | -3.886542 | 0.325754  | -1.161789 |
| C  | 36 | -2.404171 | -1.301598 | -2.166957 |
| N  | 37 | -3.639847 | -1.086623 | -1.604414 |
| C  | 38 | -5.383017 | -0.369729 | -5.539288 |
| C  | 39 | -4.54083  | -2.186838 | -1.543261 |
| C  | 40 | -2.988897 | -3.680156 | -2.088046 |
| C  | 41 | -2.026715 | -2.707719 | -2.369326 |
| C  | 42 | -2.642757 | -5.021441 | -2.263892 |
| C  | 43 | -1.364973 | -5.380635 | -2.697408 |
| C  | 44 | -0.416009 | -4.396812 | -2.971712 |
| C  | 45 | -0.74606  | -3.052983 | -2.807704 |
| N  | 46 | -4.182595 | -3.404605 | -1.720223 |
| C  | 47 | -6.50106  | 0.473232  | -5.458837 |
| C  | 48 | -7.736354 | -0.068611 | -5.090151 |
| C  | 49 | -7.860168 | -1.42471  | -4.794225 |
| C  | 50 | -6.747865 | -2.265622 | -4.852946 |
| C  | 51 | -5.516446 | -1.726188 | -5.232099 |
| C  | 52 | -6.868215 | -3.726445 | -4.501832 |

|   |    |           |           |           |
|---|----|-----------|-----------|-----------|
| C | 53 | -6.393875 | 1.94428   | -5.777732 |
| H | 54 | -5.950203 | -4.101857 | -3.997878 |
| H | 55 | -3.657113 | 1.74082   | 0.504427  |
| H | 56 | -5.909519 | -0.893125 | 1.967502  |
| H | 57 | -2.363342 | -0.441209 | 0.811718  |
| H | 58 | -3.835739 | -1.185035 | 1.46554   |
| H | 59 | -5.767068 | 2.799754  | -0.293709 |
| H | 60 | -8.17572  | 3.173618  | 0.172818  |
| H | 61 | -9.452906 | 1.537586  | 1.558976  |
| H | 62 | -2.154747 | 4.835715  | -2.588324 |
| H | 63 | -1.510093 | 4.651007  | -0.919718 |
| H | 64 | -1.134401 | 6.115202  | -1.876669 |
| H | 65 | 2.144841  | 4.270469  | -1.988256 |
| H | 66 | 1.067257  | 4.592971  | -0.587055 |
| H | 67 | 1.389808  | 5.879861  | -1.777038 |
| H | 68 | 1.099264  | 4.387694  | -4.430496 |
| H | 69 | -0.67016  | 4.669633  | -4.6021   |
| H | 70 | 0.381257  | 5.955894  | -3.957125 |
| H | 71 | -0.120467 | 2.395835  | -5.018447 |
| H | 72 | 0.833091  | 2.376187  | -2.908988 |
| H | 73 | -0.581033 | 1.420527  | -7.116567 |
| H | 74 | -4.286498 | -0.612173 | -7.975712 |
| H | 75 | -3.391981 | -5.80548  | -2.064354 |
| H | 76 | -1.107648 | -6.445327 | -2.830394 |
| H | 77 | 0.592838  | -4.680456 | -3.316433 |
| H | 78 | 0.002299  | -2.270572 | -3.018423 |
| H | 79 | -8.625636 | 0.579809  | -5.026497 |
| H | 80 | -8.841465 | -1.829938 | -4.496726 |
| H | 81 | -4.631272 | -2.381157 | -5.285506 |
| H | 82 | -7.028274 | -4.33904  | -5.416593 |
| H | 83 | -7.720994 | -3.915828 | -3.812571 |
| H | 84 | -7.39289  | 2.419915  | -5.892628 |
| H | 85 | -5.860165 | 2.48865   | -4.96734  |
| H | 86 | -5.841481 | 2.116504  | -6.727988 |
| C | 87 | -5.982374 | -1.927972 | -1.286533 |
| C | 88 | -6.763211 | -2.890854 | -0.63369  |
| C | 89 | -8.128683 | -2.690023 | -0.435471 |
| C | 90 | -8.736815 | -1.526162 | -0.898758 |

|   |    |           |           |           |
|---|----|-----------|-----------|-----------|
| C | 91 | -7.975513 | -0.564909 | -1.558262 |
| C | 92 | -6.610179 | -0.768101 | -1.756479 |
| H | 93 | -6.303447 | -3.827031 | -0.275045 |
| H | 94 | -8.729321 | -3.456413 | 0.082797  |
| H | 95 | -9.817523 | -1.368035 | -0.746682 |
| H | 96 | -8.454976 | 0.351388  | -1.940973 |
| H | 97 | -6.041545 | -0.01466  | -2.325266 |

**Figure S7:**

(A)

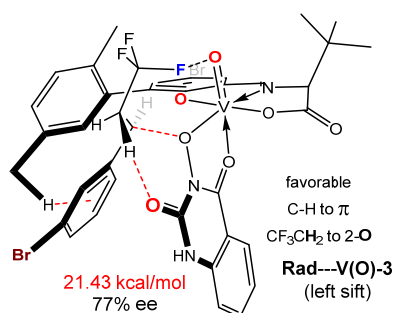

Total number of atoms: 88

|    |    |           |           |           |
|----|----|-----------|-----------|-----------|
| C  | 1  | -4.938664 | 1.775598  | 1.276846  |
| F  | 2  | -2.537073 | 1.663376  | 1.632549  |
| F  | 3  | -3.735092 | 3.046741  | 2.90603   |
| F  | 4  | -3.382398 | 3.552555  | 0.76379   |
| C  | 5  | -3.64315  | 2.500683  | 1.630775  |
| C  | 6  | -6.083029 | -0.730702 | -1.480419 |
| C  | 7  | -7.037271 | -1.726803 | -1.682307 |
| C  | 8  | -8.064742 | -1.90625  | -0.760966 |
| C  | 9  | -8.118385 | -1.093459 | 0.368235  |
| C  | 10 | -7.145899 | -0.116251 | 0.582449  |
| C  | 11 | -4.993875 | 1.142677  | -0.105414 |
| C  | 12 | -6.107262 | 0.078468  | -0.338349 |
| O  | 13 | -2.871883 | 2.837154  | -1.838917 |
| Br | 14 | -3.254676 | 1.039601  | -9.45773  |
| V  | 15 | -2.330129 | 1.243428  | -2.087327 |
| O  | 16 | -0.894192 | 1.482989  | -0.784984 |
| O  | 17 | 1.345327  | 1.344226  | -0.757844 |
| O  | 18 | -3.732301 | 1.033626  | -3.423986 |
| N  | 19 | -0.983803 | 1.844307  | -3.381196 |
| Br | 20 | -9.517073 | -1.327569 | 1.630328  |

|   |    |           |           |           |
|---|----|-----------|-----------|-----------|
| C | 21 | 0.337563  | 1.686751  | -1.334205 |
| C | 22 | -0.330855 | 4.612064  | -2.144452 |
| C | 23 | 2.073249  | 3.922252  | -2.197298 |
| C | 24 | 0.812634  | 4.19279   | -4.321691 |
| C | 25 | -1.116247 | 1.726344  | -4.64804  |
| C | 26 | -2.351604 | 1.361245  | -5.389548 |
| C | 27 | 0.691514  | 3.704183  | -2.859711 |
| C | 28 | 0.285512  | 2.192021  | -2.784996 |
| C | 29 | -2.272591 | 1.344369  | -6.788421 |
| C | 30 | -3.388947 | 1.054576  | -7.564255 |
| C | 31 | -4.610427 | 0.808407  | -6.951687 |
| C | 32 | -4.718113 | 0.826814  | -5.559969 |
| C | 33 | -3.579195 | 1.070667  | -4.772826 |
| O | 34 | -1.745879 | -0.593211 | -2.34822  |
| O | 35 | -3.498003 | 0.501719  | -0.69033  |
| C | 36 | -2.134367 | -1.344594 | -1.487233 |
| N | 37 | -3.005854 | -0.911335 | -0.504186 |
| C | 38 | -6.05274  | 0.603019  | -4.958403 |
| C | 39 | -3.424622 | -1.666218 | 0.587063  |
| C | 40 | -2.123868 | -3.531813 | -0.351127 |
| C | 41 | -1.684292 | -2.745954 | -1.415517 |
| C | 42 | -1.701712 | -4.864546 | -0.267591 |
| C | 43 | -0.850269 | -5.396929 | -1.236675 |
| C | 44 | -0.412548 | -4.601196 | -2.295096 |
| C | 45 | -0.828787 | -3.273257 | -2.387369 |
| N | 46 | -2.985066 | -2.973244 | 0.633528  |
| C | 47 | -6.693293 | 1.593832  | -4.195351 |
| C | 48 | -7.973149 | 1.342716  | -3.688626 |
| C | 49 | -8.633028 | 0.148598  | -3.968523 |
| C | 50 | -8.021727 | -0.82514  | -4.758443 |
| C | 51 | -6.730385 | -0.58893  | -5.236035 |
| C | 52 | -8.739063 | -2.110167 | -5.085155 |
| C | 53 | -6.090844 | 2.958885  | -3.962851 |
| H | 54 | -8.028091 | -2.955998 | -5.216112 |
| H | 55 | -5.137126 | 1.963596  | -0.8356   |
| H | 56 | -7.211625 | 0.502853  | 1.490072  |
| H | 57 | -5.098977 | 0.995488  | 2.053725  |
| H | 58 | -5.783261 | 2.495478  | 1.382654  |

|   |    |           |           |           |
|---|----|-----------|-----------|-----------|
| H | 59 | -5.289525 | -0.603952 | -2.233149 |
| H | 60 | -6.979066 | -2.368984 | -2.57676  |
| H | 61 | -8.825557 | -2.685964 | -0.928922 |
| H | 62 | -1.317356 | 4.601145  | -2.656993 |
| H | 63 | -0.492108 | 4.307329  | -1.086631 |
| H | 64 | 0.009146  | 5.671853  | -2.129145 |
| H | 65 | 2.844753  | 3.242454  | -2.624009 |
| H | 66 | 2.044237  | 3.754113  | -1.098229 |
| H | 67 | 2.437497  | 4.963677  | -2.34632  |
| H | 68 | 1.508154  | 3.556634  | -4.913647 |
| H | 69 | -0.169701 | 4.207478  | -4.842798 |
| H | 70 | 1.205816  | 5.233026  | -4.370037 |
| H | 71 | -0.233119 | 1.95584   | -5.265027 |
| H | 72 | 1.065813  | 1.62236   | -3.342476 |
| H | 73 | -1.317126 | 1.56857   | -7.290009 |
| H | 74 | -5.503664 | 0.614067  | -7.567923 |
| H | 75 | -2.039733 | -5.497123 | 0.569203  |
| H | 76 | -0.518491 | -6.446775 | -1.16351  |
| H | 77 | 0.265454  | -5.020762 | -3.057448 |
| H | 78 | -0.477658 | -2.644887 | -3.223416 |
| H | 79 | -8.481969 | 2.108931  | -3.080643 |
| H | 80 | -9.648156 | -0.018755 | -3.572292 |
| H | 81 | -6.23908  | -1.356826 | -5.855746 |
| H | 82 | -9.320228 | -2.006775 | -6.028246 |
| H | 83 | -9.4492   | -2.400542 | -4.279273 |
| H | 84 | -6.873426 | 3.749764  | -3.954809 |
| H | 85 | -5.566695 | 3.002082  | -2.983393 |
| H | 86 | -5.363005 | 3.242804  | -4.754267 |
| O | 87 | -4.139101 | -1.240613 | 1.461614  |
| H | 88 | -3.327515 | -3.508945 | 1.446132  |

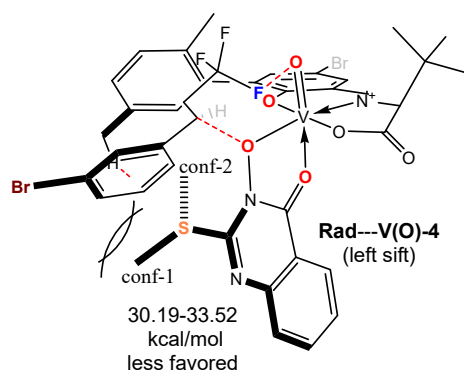

Total number of atoms: 91

|    |    |           |           |           |
|----|----|-----------|-----------|-----------|
| C  | 1  | -4.980415 | 1.864853  | 1.126797  |
| F  | 2  | -2.597434 | 1.90932   | 1.589786  |
| F  | 3  | -3.929689 | 3.270214  | 2.749378  |
| F  | 4  | -3.506635 | 3.711819  | 0.607251  |
| C  | 5  | -3.747092 | 2.680914  | 1.503608  |
| C  | 6  | -5.903269 | -0.870829 | -1.484338 |
| C  | 7  | -6.838177 | -1.888173 | -1.669945 |
| C  | 8  | -7.927791 | -1.999612 | -0.811226 |
| C  | 9  | -8.063722 | -1.095603 | 0.239009  |
| C  | 10 | -7.110735 | -0.096573 | 0.440139  |
| C  | 11 | -4.919003 | 1.119971  | -0.1989   |
| C  | 12 | -6.008306 | 0.028344  | -0.416391 |
| O  | 13 | -2.787891 | 2.839788  | -1.788131 |
| Br | 14 | -3.340149 | 1.073135  | -9.434409 |
| V  | 15 | -2.260254 | 1.251566  | -2.091004 |
| O  | 16 | -0.792811 | 1.450291  | -0.817302 |
| O  | 17 | 1.447016  | 1.315382  | -0.852477 |
| O  | 18 | -3.697536 | 1.081904  | -3.394392 |
| N  | 19 | -0.94841  | 1.889039  | -3.401828 |
| Br | 20 | -9.545691 | -1.235439 | 1.416381  |
| C  | 21 | 0.423748  | 1.67259   | -1.392137 |
| C  | 22 | -0.290457 | 4.622922  | -2.111956 |
| C  | 23 | 2.116081  | 3.94876   | -2.205611 |
| C  | 24 | 0.83127   | 4.264976  | -4.310669 |
| C  | 25 | -1.110309 | 1.793077  | -4.667645 |
| C  | 26 | -2.357525 | 1.418505  | -5.385876 |
| C  | 27 | 0.729645  | 3.739583  | -2.860303 |
| C  | 28 | 0.333298  | 2.223819  | -2.824679 |
| C  | 29 | -2.307264 | 1.399159  | -6.786266 |

|   |    |           |           |           |
|---|----|-----------|-----------|-----------|
| C | 30 | -3.436381 | 1.094724  | -7.538375 |
| C | 31 | -4.642416 | 0.833482  | -6.901016 |
| C | 32 | -4.721478 | 0.854903  | -5.507558 |
| C | 33 | -3.571126 | 1.120169  | -4.745534 |
| O | 34 | -1.685066 | -0.573122 | -2.44298  |
| O | 35 | -3.387442 | 0.469822  | -0.676882 |
| C | 36 | -2.034622 | -1.344639 | -1.586147 |
| N | 37 | -2.860358 | -0.93801  | -0.562923 |
| C | 38 | -6.036394 | 0.609     | -4.872952 |
| C | 39 | -3.064729 | -1.85613  | 0.505491  |
| C | 40 | -1.96616  | -3.521193 | -0.453849 |
| C | 41 | -1.588546 | -2.745825 | -1.551727 |
| C | 42 | -1.548593 | -4.853059 | -0.407176 |
| C | 43 | -0.773383 | -5.396481 | -1.433005 |
| C | 44 | -0.401747 | -4.608524 | -2.521165 |
| C | 45 | -0.808929 | -3.277004 | -2.582422 |
| N | 46 | -2.663142 | -3.069974 | 0.516902  |
| C | 47 | -6.678397 | 1.594898  | -4.105151 |
| C | 48 | -7.934852 | 1.319302  | -3.554589 |
| C | 49 | -8.572959 | 0.105364  | -3.798252 |
| C | 50 | -7.963073 | -0.862735 | -4.596575 |
| C | 51 | -6.692328 | -0.602362 | -5.115683 |
| C | 52 | -8.660379 | -2.166566 | -4.891292 |
| C | 53 | -6.103215 | 2.97875   | -3.918401 |
| H | 54 | -7.935416 | -3.001395 | -5.016128 |
| H | 55 | -5.064589 | 1.887152  | -0.983441 |
| H | 56 | -7.244906 | 0.595418  | 1.285539  |
| H | 57 | -5.15938  | 1.142348  | 1.952651  |
| H | 58 | -5.860089 | 2.549637  | 1.122075  |
| H | 59 | -5.06467  | -0.794135 | -2.194438 |
| H | 60 | -6.719178 | -2.596505 | -2.507012 |
| H | 61 | -8.674327 | -2.795468 | -0.968247 |
| H | 62 | -1.279976 | 4.625249  | -2.618795 |
| H | 63 | -0.443886 | 4.286454  | -1.06267  |
| H | 64 | 0.047258  | 5.682426  | -2.067388 |
| H | 65 | 2.887434  | 3.285512  | -2.657297 |
| H | 66 | 2.098343  | 3.751233  | -1.111263 |
| H | 67 | 2.472175  | 4.995969  | -2.330009 |



|   |    |           |           |           |
|---|----|-----------|-----------|-----------|
| H | 68 | 1.52645   | 3.650047  | -4.925115 |
| H | 69 | -0.15651  | 4.281932  | -4.821685 |
| H | 70 | 1.213303  | 5.310113  | -4.336775 |
| H | 71 | -0.243597 | 2.041456  | -5.300262 |
| H | 72 | 1.103326  | 1.677101  | -3.418225 |
| H | 73 | -1.364701 | 1.631251  | -7.307992 |
| H | 74 | -5.544926 | 0.622538  | -7.498163 |
| H | 75 | -1.830721 | -5.480908 | 0.454341  |
| H | 76 | -0.448328 | -6.449114 | -1.379236 |
| H | 77 | 0.215732  | -5.035623 | -3.329485 |
| H | 78 | -0.513819 | -2.64881  | -3.439853 |
| H | 79 | -8.445143 | 2.081631  | -2.94284  |
| H | 80 | -9.5714   | -0.081169 | -3.369768 |
| H | 81 | -6.199583 | -1.366479 | -5.73908  |
| H | 82 | -9.254479 | -2.090566 | -5.828895 |
| H | 83 | -9.355736 | -2.455762 | -4.072128 |
| H | 84 | -6.906171 | 3.74772   | -3.872915 |
| H | 85 | -5.524482 | 3.048977  | -2.972089 |
| H | 86 | -5.430896 | 3.273091  | -4.753722 |
| S | 87 | -4.029687 | -1.412122 | 1.962729  |
| C | 88 | -5.255964 | -2.684425 | 2.320353  |
| H | 89 | -4.741702 | -3.637055 | 2.573878  |
| H | 90 | -5.902836 | -2.837167 | 1.429181  |
| H | 91 | -5.879447 | -2.357523 | 3.180786  |

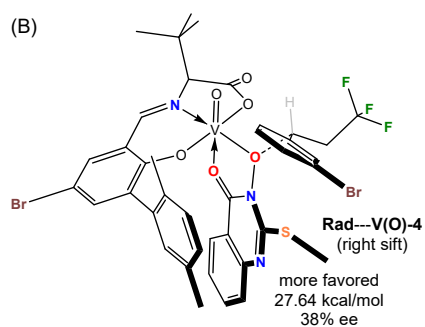

Total number of atoms:91

|   |   |          |          |          |
|---|---|----------|----------|----------|
| C | 1 | -2.79042 | 0.851531 | 0.630975 |
| F | 2 | -1.89918 | 3.00542  | 1.27747  |
| F | 3 | -1.10022 | 1.18573  | 2.30022  |
| F | 4 | -3.15756 | 1.91245  | 2.77468  |
| C | 5 | -2.24392 | 1.74375  | 1.74317  |

|    |    |           |           |          |
|----|----|-----------|-----------|----------|
| C  | 6  | -6.56455  | 1.8772    | 0.122636 |
| C  | 7  | -7.83923  | 1.70322   | 0.660472 |
| C  | 8  | -8.02428  | 0.854613  | 1.74863  |
| C  | 9  | -6.92599  | 0.197198  | 2.29802  |
| C  | 10 | -5.65121  | 0.379379  | 1.7608   |
| C  | 11 | -4.05357  | 1.42077   | 0.009521 |
| C  | 12 | -5.45444  | 1.20512   | 0.646865 |
| O  | 13 | -4.79408  | 3.24071   | -2.43329 |
| Br | 14 | -7.42862  | 0.257781  | -9.41693 |
| V  | 15 | -3.94103  | 1.96633   | -3.17039 |
| O  | 16 | -2.23628  | 2.74185   | -2.62003 |
| O  | 17 | -0.409935 | 3.65244   | -3.55369 |
| O  | 18 | -5.64116  | 1.23267   | -3.74389 |
| N  | 19 | -3.68175  | 3.01814   | -4.80388 |
| Br | 20 | -7.16296  | -0.954613 | 3.78836  |
| C  | 21 | -1.60694  | 3.47547   | -3.5859  |
| C  | 22 | -3.51004  | 5.887     | -3.49912 |
| C  | 23 | -1.44873  | 6.18717   | -4.88587 |
| C  | 24 | -3.64784  | 5.83085   | -5.9899  |
| C  | 25 | -4.30158  | 2.75569   | -5.89604 |
| C  | 26 | -5.39857  | 1.76377   | -6.08849 |
| C  | 27 | -2.78531  | 5.41476   | -4.77662 |
| C  | 28 | -2.51847  | 3.8722    | -4.76364 |
| C  | 29 | -5.84736  | 1.51821   | -7.39268 |
| C  | 30 | -6.85154  | 0.583978  | -7.63813 |
| C  | 31 | -7.41091  | -0.134738 | -6.58675 |
| C  | 32 | -6.99069  | 0.107885  | -5.27985 |
| C  | 33 | -6.02159  | 1.08629   | -5.03133 |
| O  | 34 | -2.97834  | 0.499408  | -4.00894 |
| O  | 35 | -4.09853  | 0.775351  | -1.61173 |
| C  | 36 | -3.10895  | -0.537429 | -3.41082 |
| N  | 37 | -3.74467  | -0.571367 | -2.19041 |
| C  | 38 | -7.52633  | -0.702964 | -4.164   |
| C  | 39 | -4.1066   | -1.85634  | -1.69776 |
| C  | 40 | -3.00162  | -2.98217  | -3.25043 |
| C  | 41 | -2.65328  | -1.82701  | -3.95109 |
| C  | 42 | -2.5762   | -4.21464  | -3.74969 |
| C  | 43 | -1.8183   | -4.28903  | -4.91974 |

|   |    |           |           |           |
|---|----|-----------|-----------|-----------|
| C | 44 | -1.48117  | -3.12576  | -5.61035  |
| C | 45 | -1.90094  | -1.88808  | -5.12685  |
| N | 46 | -3.70645  | -2.96867  | -2.18479  |
| C | 47 | -8.32535  | -0.136714 | -3.15827  |
| C | 48 | -8.72964  | -0.931517 | -2.08035  |
| C | 49 | -8.36418  | -2.27366  | -2.00565  |
| C | 50 | -7.58612  | -2.84962  | -3.01076  |
| C | 51 | -7.1745   | -2.05317  | -4.08184  |
| C | 52 | -7.17206  | -4.29727  | -2.94227  |
| C | 53 | -8.78418  | 1.29958   | -3.22195  |
| H | 54 | -7.69823  | -4.89538  | -3.71918  |
| H | 55 | -3.89395  | 2.4878    | -0.236401 |
| H | 56 | -4.80352  | -0.149044 | 2.22235   |
| H | 57 | -2.0042   | 0.749412  | -0.151914 |
| H | 58 | -2.96686  | -0.17545  | 1.02018   |
| H | 59 | -6.44357  | 2.54981   | -0.740232 |
| H | 60 | -8.70059  | 2.23491   | 0.221294  |
| H | 61 | -9.03264  | 0.711744  | 2.17087   |
| H | 62 | -4.53862  | 5.47085   | -3.43435  |
| H | 63 | -2.96416  | 5.59397   | -2.57494  |
| H | 64 | -3.61271  | 6.99507   | -3.47864  |
| H | 65 | -0.842305 | 5.83905   | -5.75212  |
| H | 66 | -0.824319 | 6.08006   | -3.97208  |
| H | 67 | -1.6188   | 7.27834   | -5.02495  |
| H | 68 | -3.1868   | 5.51295   | -6.95187  |
| H | 69 | -4.67367  | 5.40315   | -5.94102  |
| H | 70 | -3.77058  | 6.93591   | -6.03978  |
| H | 71 | -3.97118  | 3.29127   | -6.80036  |
| H | 72 | -1.93783  | 3.64801   | -5.68928  |
| H | 73 | -5.39481  | 2.05662   | -8.24116  |
| H | 74 | -8.1815   | -0.898827 | -6.78095  |
| H | 75 | -2.84472  | -5.13961  | -3.21328  |
| H | 76 | -1.48724  | -5.27023  | -5.30039  |
| H | 77 | -0.882979 | -3.18417  | -6.53565  |
| H | 78 | -1.63582  | -0.964981 | -5.66943  |
| H | 79 | -9.34645  | -0.496317 | -1.27678  |
| H | 80 | -8.69132  | -2.87872  | -1.14383  |
| H | 81 | -6.53381  | -2.49326  | -4.86364  |

|   |    |          |          |           |
|---|----|----------|----------|-----------|
| H | 82 | -7.40336 | -4.7523  | -1.9536   |
| H | 83 | -6.07789 | -4.41041 | -3.1096   |
| H | 84 | -9.73109 | 1.45296  | -2.65852  |
| H | 85 | -8.02394 | 1.98279  | -2.78403  |
| H | 86 | -8.97624 | 1.62637  | -4.26781  |
| S | 87 | -5.12053 | -2.04966 | -0.222228 |
| C | 88 | -4.41374 | -3.27165 | 0.897914  |
| H | 89 | -4.37651 | -4.26149 | 0.39256   |
| H | 90 | -3.38632 | -2.9585  | 1.18573   |
| H | 91 | -5.0489  | -3.34376 | 1.80755   |

**Figure S9:**

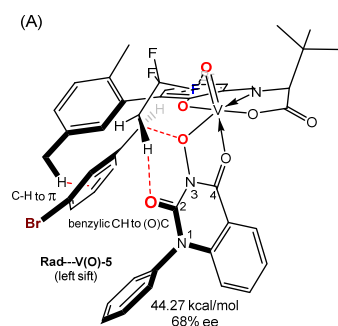

Total number of atoms: 98

|    |    |           |           |           |
|----|----|-----------|-----------|-----------|
| C  | 1  | -5.57351  | 1.49967   | 0.695577  |
| F  | 2  | -3.45404  | 2.64473   | 0.984342  |
| F  | 3  | -5.23297  | 3.42052   | 2.08248   |
| F  | 4  | -5.08455  | 3.71984   | -0.123454 |
| C  | 5  | -4.82812  | 2.81505   | 0.898723  |
| C  | 6  | -5.99301  | -1.1093   | -2.17136  |
| C  | 7  | -6.67555  | -2.29014  | -2.46014  |
| C  | 8  | -7.47751  | -2.88594  | -1.49079  |
| C  | 9  | -7.57847  | -2.29915  | -0.23164  |
| C  | 10 | -6.88399  | -1.12449  | 0.057908  |
| C  | 11 | -5.2731   | 0.788018  | -0.610972 |
| C  | 12 | -6.07858  | -0.510018 | -0.910233 |
| O  | 13 | -2.82437  | 2.81133   | -1.75597  |
| Br | 14 | -3.10915  | 1.91601   | -9.52729  |
| V  | 15 | -2.36143  | 1.22612   | -2.16518  |
| O  | 16 | -0.958455 | 1.24385   | -0.806292 |
| O  | 17 | 1.26198   | 0.922033  | -0.756366 |
| O  | 18 | -3.73127  | 1.23344   | -3.54923  |

|    |    |           |           |           |
|----|----|-----------|-----------|-----------|
| N  | 19 | -0.947539 | 1.8842    | -3.35494  |
| Br | 20 | -8.65779  | -3.11414  | 1.10092   |
| C  | 21 | 0.299338  | 1.40539   | -1.30873  |
| C  | 22 | -0.119905 | 4.43007   | -1.7578   |
| C  | 23 | 2.22968   | 3.5802    | -1.91002  |
| C  | 24 | 0.998278  | 4.20432   | -3.97595  |
| C  | 25 | -1.05457  | 1.92712   | -4.62939  |
| C  | 26 | -2.28786  | 1.72032   | -5.43363  |
| C  | 27 | 0.837702  | 3.54758   | -2.58582  |
| C  | 28 | 0.324425  | 2.07104   | -2.69503  |
| C  | 29 | -2.17767  | 1.8645    | -6.82301  |
| C  | 30 | -3.28744  | 1.71588   | -7.64787  |
| C  | 31 | -4.53109  | 1.44256   | -7.09311  |
| C  | 32 | -4.66828  | 1.30245   | -5.7116   |
| C  | 33 | -3.54181  | 1.41896   | -4.88004  |
| O  | 34 | -1.87175  | -0.60241  | -2.61301  |
| O  | 35 | -3.60265  | 0.401783  | -0.88542  |
| C  | 36 | -2.27663  | -1.40702  | -1.80971  |
| N  | 37 | -3.11422  | -1.01928  | -0.78087  |
| C  | 38 | -6.01435  | 1.03462   | -5.15703  |
| C  | 39 | -3.5131   | -1.82022  | 0.280384  |
| C  | 40 | -2.34955  | -3.686    | -0.866802 |
| C  | 41 | -1.87261  | -2.82323  | -1.85161  |
| C  | 42 | -1.94008  | -5.02482  | -0.880208 |
| C  | 43 | -1.09576  | -5.49314  | -1.88824  |
| C  | 44 | -0.641927 | -4.62662  | -2.8816   |
| C  | 45 | -1.02597  | -3.28685  | -2.86253  |
| N  | 46 | -3.19801  | -3.16379  | 0.148314  |
| C  | 47 | -6.65412  | 1.94943   | -4.30463  |
| C  | 48 | -7.91995  | 1.63684   | -3.79737  |
| C  | 49 | -8.56614  | 0.458023  | -4.16246  |
| C  | 50 | -7.96083  | -0.43204  | -5.04999  |
| C  | 51 | -6.6841   | -0.134452 | -5.53292  |
| C  | 52 | -8.67299  | -1.69259  | -5.47073  |
| C  | 53 | -6.05768  | 3.29659   | -3.97253  |
| H  | 54 | -7.96065  | -2.47858  | -5.80675  |
| H  | 55 | -5.43156  | 1.50715   | -1.43767  |
| H  | 56 | -6.9699   | -0.694671 | 1.06771   |

|   |    |           |           |           |
|---|----|-----------|-----------|-----------|
| H | 57 | -5.33349  | 0.833703  | 1.55403   |
| H | 58 | -6.66675  | 1.70905   | 0.75202   |
| H | 59 | -5.36076  | -0.657056 | -2.95117  |
| H | 60 | -6.57739  | -2.75179  | -3.45686  |
| H | 61 | -8.0205   | -3.81743  | -1.72041  |
| H | 62 | -1.10418  | 4.55006   | -2.26057  |
| H | 63 | -0.304387 | 4.01129   | -0.74373  |
| H | 64 | 0.29376   | 5.45365   | -1.6162   |
| H | 65 | 2.95176   | 2.90778   | -2.42554  |
| H | 66 | 2.1867    | 3.27434   | -0.841709 |
| H | 67 | 2.66735   | 4.60355   | -1.92706  |
| H | 68 | 1.65252   | 3.60114   | -4.64458  |
| H | 69 | 0.021324  | 4.34988   | -4.48716  |
| H | 70 | 1.46092   | 5.2135    | -3.89581  |
| H | 71 | -0.143312 | 2.17013   | -5.19837  |
| H | 72 | 1.07866   | 1.51218   | -3.29753  |
| H | 73 | -1.20215  | 2.1029    | -7.27743  |
| H | 74 | -5.41617  | 1.34884   | -7.74378  |
| H | 75 | -2.27121  | -5.72514  | -0.09668  |
| H | 76 | -0.779515 | -6.55022  | -1.89485  |
| H | 77 | 0.029714  | -4.99728  | -3.67478  |
| H | 78 | -0.654912 | -2.59886  | -3.64088  |
| H | 79 | -8.42834  | 2.34188   | -3.11894  |
| H | 80 | -9.56965  | 0.239114  | -3.76152  |
| H | 81 | -6.19137  | -0.840362 | -6.22132  |
| H | 82 | -9.3706   | -1.48748  | -6.31291  |
| H | 83 | -9.26729  | -2.12399  | -4.63461  |
| H | 84 | -6.84843  | 4.06779   | -3.83886  |
| H | 85 | -5.47239  | 3.2563    | -3.02853  |
| H | 86 | -5.38466  | 3.66827   | -4.77616  |
| O | 87 | -4.12814  | -1.3946   | 1.23      |
| C | 88 | -3.83727  | -4.07464  | 1.02824   |
| C | 89 | -3.34348  | -4.2814   | 2.31653   |
| C | 90 | -3.97773  | -5.19026  | 3.16413   |
| C | 91 | -5.09408  | -5.89838  | 2.71687   |
| C | 92 | -5.57591  | -5.70377  | 1.42209   |
| C | 93 | -4.94339  | -4.79469  | 0.574705  |
| H | 94 | -2.46152  | -3.7183   | 2.6628    |

|   |    |          |          |          |
|---|----|----------|----------|----------|
| H | 95 | -3.59968 | -5.34547 | 4.18878  |
| H | 96 | -5.59877 | -6.61244 | 3.38941  |
| H | 97 | -6.45878 | -6.26418 | 1.07098  |
| H | 98 | -5.31854 | -4.63756 | -0.44939 |

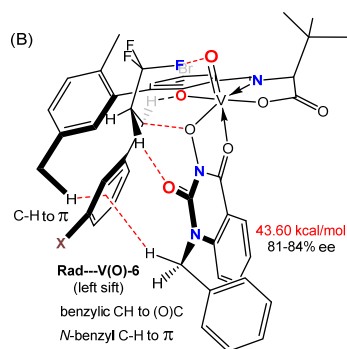

Total number of atoms: 101

|    |    |          |          |          |
|----|----|----------|----------|----------|
| C  | 1  | -6.4698  | 2.6448   | 2.082    |
| F  | 2  | -4.4474  | 3.9721   | 2.249    |
| F  | 3  | -6.3481  | 4.839899 | 3.0309   |
| F  | 4  | -6.0391  | 4.6668   | 0.8278   |
| C  | 5  | -5.8177  | 4.0238   | 2.0388   |
| C  | 6  | -6.5596  | -0.4831  | -0.2498  |
| C  | 7  | -7.1001  | -1.7659  | -0.3218  |
| C  | 8  | -7.8381  | -2.2692  | 0.7456   |
| C  | 9  | -8.0298  | -1.4798  | 1.877199 |
| C  | 10 | -7.4807  | -0.1993  | 1.9489   |
| C  | 11 | -6.0523  | 1.7179   | 0.956799 |
| C  | 12 | -6.7283  | 0.3166   | 0.886    |
| O  | 13 | -3.421   | 3.5764   | -0.3612  |
| Br | 14 | -4.0976  | 0.9566   | -7.8316  |
| V  | 15 | -3.094   | 1.917099 | -0.547   |
| O  | 16 | -1.6273  | 2.039099 | 0.7371   |
| O  | 17 | 0.5861   | 1.6737   | 0.7703   |
| O  | 18 | -4.5195  | 1.840299 | -1.869   |
| N  | 19 | -1.6977  | 2.2569   | -1.8824  |
| Br | 20 | -9.023   | -2.1656  | 3.341799 |
| C  | 21 | -0.3851  | 2.081199 | 0.173699 |
| C  | 22 | -0.7288  | 5.010599 | -0.8687  |
| C  | 23 | 1.580099 | 4.0478   | -0.8249  |
| C  | 24 | 0.376    | 4.2874   | -2.9857  |

|   |    |         |          |          |
|---|----|---------|----------|----------|
| C | 25 | -1.8513 | 2.0416   | -3.1352  |
| C | 26 | -3.1232 | 1.731299 | -3.8421  |
| C | 27 | 0.188   | 3.9374   | -1.4914  |
| C | 28 | -0.3929 | 2.4936   | -1.3087  |
| C | 29 | -3.0608 | 1.5159   | -5.225   |
| C | 30 | -4.2125 | 1.251799 | -5.96    |
| C | 31 | -5.45   | 1.2262   | -5.3282  |
| C | 32 | -5.5388 | 1.450499 | -3.9543  |
| C | 33 | -4.3729 | 1.6824   | -3.2072  |
| O | 34 | -2.7754 | 0.004199 | -0.7188  |
| O | 35 | -4.3372 | 1.4001   | 0.882299 |
| C | 36 | -3.1953 | -0.6225  | 0.2238   |
| N | 37 | -3.917  | -0.0057  | 1.22     |
| C | 38 | -6.8709 | 1.4466   | -3.3082  |
| C | 39 | -4.279  | -0.5738  | 2.432    |
| C | 40 | -3.4574 | -2.6999  | 1.5285   |
| C | 41 | -2.9624 | -2.0643  | 0.3882   |
| C | 42 | -3.2598 | -4.0826  | 1.6444   |
| C | 43 | -2.5784 | -4.7965  | 0.6569   |
| C | 44 | -2.0857 | -4.1417  | -0.4689  |
| C | 45 | -2.2815 | -2.7703  | -0.6074  |
| O | 46 | -4.7402 | 0.089599 | 3.330899 |
| N | 47 | -4.1475 | -1.9566  | 2.5416   |
| C | 48 | -7.3868 | 2.598499 | -2.6923  |
| C | 49 | -8.6242 | 2.5291   | -2.0439  |
| C | 50 | -9.3591 | 1.3462   | -2.0324  |
| C | 51 | -8.8789 | 0.211    | -2.6859  |
| C | 52 | -7.6371 | 0.2766   | -3.3236  |
| C | 53 | -9.6883 | -1.0608  | -2.6791  |
| C | 54 | -6.6775 | 3.930299 | -2.7561  |
| C | 55 | -4.7417 | -2.6455  | 3.692799 |
| C | 56 | -3.9264 | -4.4997  | 5.208299 |
| C | 57 | -2.9965 | -5.0412  | 6.095199 |
| C | 58 | -1.8584 | -4.3158  | 6.4412   |
| C | 59 | -1.6584 | -3.0445  | 5.9068   |
| C | 60 | -2.5904 | -2.5027  | 5.022    |
| C | 61 | -3.7244 | -3.232   | 4.6472   |
| H | 62 | -9.1041 | -1.9307  | -3.0531  |



|   |     |          |          |          |
|---|-----|----------|----------|----------|
| H | 63  | -5.4386  | -3.4394  | 3.340699 |
| H | 64  | -5.3846  | -1.9624  | 4.2916   |
| H | 65  | -6.1943  | 2.2481   | -0.0039  |
| H | 66  | -7.6289  | 0.3922   | 2.865499 |
| H | 67  | -6.2375  | 2.1815   | 3.066399 |
| H | 68  | -7.5755  | 2.779999 | 2.046799 |
| H | 69  | -5.9624  | -0.1119  | -1.0969  |
| H | 70  | -6.9338  | -2.3832  | -1.2209  |
| H | 71  | -8.2609  | -3.2859  | 0.6918   |
| H | 72  | -1.7045  | 5.073199 | -1.3984  |
| H | 73  | -0.9349  | 4.81     | 0.205999 |
| H | 74  | -0.2679  | 6.022    | -0.9282  |
| H | 75  | 2.2716   | 3.2535   | -1.1854  |
| H | 76  | 1.5235   | 3.9708   | 0.2831   |
| H | 77  | 2.0625   | 5.026    | -1.0474  |
| H | 78  | 0.9996   | 3.5303   | -3.5119  |
| H | 79  | -0.5939  | 4.3685   | -3.5237  |
| H | 80  | 0.8849   | 5.2695   | -3.1109  |
| H | 81  | -0.9526  | 2.1144   | -3.7683  |
| H | 82  | 0.3114   | 1.7999   | -1.8255  |
| H | 83  | -2.0902  | 1.555299 | -5.746   |
| H | 84  | -6.3657  | 1.040899 | -5.9134  |
| H | 85  | -3.6311  | -4.6393  | 2.516499 |
| H | 86  | -2.4262  | -5.8836  | 0.769799 |
| H | 87  | -1.5467  | -4.7063  | -1.2486  |
| H | 88  | -1.9027  | -2.2508  | -1.5041  |
| H | 89  | -9.0342  | 3.4244   | -1.5476  |
| H | 90  | -10.3338 | 1.3135   | -1.5178  |
| H | 91  | -7.2395  | -0.6211  | -3.8243  |
| H | 92  | -10.5892 | -0.9595  | -3.3241  |
| H | 93  | -10.0321 | -1.3119  | -1.6508  |
| H | 94  | -7.4003  | 4.776    | -2.7614  |
| H | 95  | -6.0085  | 4.071799 | -1.8796  |
| H | 96  | -6.0614  | 4.033099 | -3.6765  |
| H | 97  | -4.8283  | -5.0816  | 4.954299 |
| H | 98  | -3.1642  | -6.0419  | 6.5275   |
| H | 99  | -1.1229  | -4.7424  | 7.1434   |
| H | 100 | -0.7638  | -2.4633  | 6.1872   |

H            101    -2.4251   -1.491   4.6149

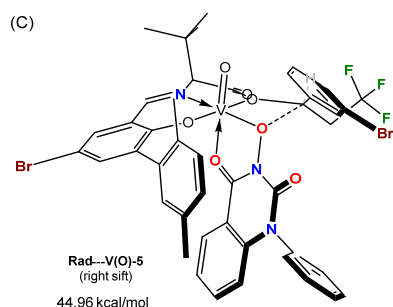

Total number of atoms: 98

|    |    |           |           |           |
|----|----|-----------|-----------|-----------|
| C  | 1  | -3.58444  | 0.176171  | 1.53336   |
| F  | 2  | -2.56291  | 1.99934   | 2.74976   |
| F  | 3  | -2.7653   | 0.029002  | 3.78422   |
| F  | 4  | -4.57482  | 1.29161   | 3.43709   |
| C  | 5  | -3.37577  | 0.879962  | 2.87155   |
| C  | 6  | -6.34353  | 2.30485   | -0.295636 |
| C  | 7  | -7.72109  | 2.51707   | -0.34736  |
| C  | 8  | -8.57817  | 1.70747   | 0.394325  |
| C  | 9  | -8.04759  | 0.6914    | 1.18629   |
| C  | 10 | -6.66936  | 0.483642  | 1.23796   |
| C  | 11 | -4.25811  | 1.08036   | 0.51527   |
| C  | 12 | -5.79727  | 1.27908   | 0.484098  |
| O  | 13 | -3.13228  | 2.89677   | -1.86423  |
| Br | 14 | -2.13558  | 0.578533  | -9.4945   |
| V  | 15 | -2.46202  | 1.36319   | -2.17294  |
| O  | 16 | -1.20527  | 1.56614   | -0.692723 |
| O  | 17 | 1.00701   | 1.73192   | -0.362734 |
| O  | 18 | -3.66886  | 1.1631    | -3.68105  |
| N  | 19 | -1.02437  | 2.15479   | -3.24546  |
| Br | 20 | -9.20682  | -0.414583 | 2.20605   |
| C  | 21 | 0.044935  | 1.97768   | -1.05488  |
| C  | 22 | -0.76328  | 4.88634   | -1.69811  |
| C  | 23 | 1.69129   | 4.41192   | -1.63274  |
| C  | 24 | 0.545624  | 4.73261   | -3.81651  |
| C  | 25 | -0.975576 | 2.06238   | -4.52202  |
| C  | 26 | -2.01375  | 1.48029   | -5.41624  |
| C  | 27 | 0.379764  | 4.12763   | -2.40384  |

|   |    |           |           |           |
|---|----|-----------|-----------|-----------|
| C | 28 | 0.113845  | 2.58578   | -2.46767  |
| C | 29 | -1.69484  | 1.34145   | -6.77318  |
| C | 30 | -2.59968  | 0.772629  | -7.66402  |
| C | 31 | -3.82718  | 0.309448  | -7.20587  |
| C | 32 | -4.17214  | 0.449071  | -5.86072  |
| C | 33 | -3.2882   | 1.08757   | -4.97844  |
| O | 34 | -1.7913   | -0.425195 | -2.53944  |
| O | 35 | -3.78789  | 0.458089  | -1.0467   |
| C | 36 | -2.57237  | -1.28695  | -2.21408  |
| N | 37 | -3.69883  | -0.980686 | -1.47326  |
| C | 38 | -5.43685  | -0.149028 | -5.37414  |
| C | 39 | -4.70494  | -1.86917  | -1.12407  |
| C | 40 | -3.37525  | -3.62241  | -2.26308  |
| C | 41 | -2.40588  | -2.69031  | -2.63076  |
| C | 42 | -3.24615  | -4.94476  | -2.7045   |
| C | 43 | -2.14648  | -5.32697  | -3.47434  |
| C | 44 | -1.17347  | -4.3907   | -3.82057  |
| C | 45 | -1.30512  | -3.06697  | -3.4051   |
| N | 46 | -4.48063  | -3.1905   | -1.4778   |
| C | 47 | -6.44235  | 0.609751  | -4.75245  |
| C | 48 | -7.58375  | -0.040347 | -4.26935  |
| C | 49 | -7.75202  | -1.41378  | -4.4333   |
| C | 50 | -6.77577  | -2.16965  | -5.08227  |
| C | 51 | -5.62256  | -1.52606  | -5.53469  |
| C | 52 | -6.94044  | -3.65235  | -5.3001   |
| C | 53 | -6.37098  | 2.11258   | -4.62728  |
| H | 54 | -6.09177  | -4.2184   | -4.85509  |
| H | 55 | -3.73135  | 2.05309   | 0.470811  |
| H | 56 | -6.28016  | -0.325477 | 1.8745    |
| H | 57 | -2.58971  | -0.145674 | 1.14846   |
| H | 58 | -4.16714  | -0.758859 | 1.68553   |
| H | 59 | -5.6805   | 2.95478   | -0.889474 |
| H | 60 | -8.13181  | 3.32563   | -0.975407 |
| H | 61 | -9.66721  | 1.87447   | 0.35426   |
| H | 62 | -1.70553  | 4.84688   | -2.28631  |
| H | 63 | -0.974711 | 4.47709   | -0.685374 |
| H | 64 | -0.51443  | 5.96337   | -1.5677   |
| H | 65 | 2.54722   | 3.83596   | -2.05076  |

|   |    |           |           |           |
|---|----|-----------|-----------|-----------|
| H | 66 | 1.60821   | 4.15756   | -0.553447 |
| H | 67 | 1.96814   | 5.48892   | -1.68181  |
| H | 68 | 1.35124   | 4.2234    | -4.39147  |
| H | 69 | -0.392431 | 4.67231   | -4.41118  |
| H | 70 | 0.816387  | 5.81113   | -3.76653  |
| H | 71 | -0.053678 | 2.41137   | -5.01408  |
| H | 72 | 1.01112   | 2.13369   | -2.95214  |
| H | 73 | -0.710693 | 1.67019   | -7.14523  |
| H | 74 | -4.52805  | -0.177587 | -7.90369  |
| H | 75 | -4.00858  | -5.70025  | -2.45695  |
| H | 76 | -2.04904  | -6.37213  | -3.81455  |
| H | 77 | -0.306789 | -4.6938   | -4.43249  |
| H | 78 | -0.544503 | -2.32288  | -3.69591  |
| H | 79 | -8.37249  | 0.542128  | -3.76489  |
| H | 80 | -8.66755  | -1.89751  | -4.0548   |
| H | 81 | -4.83489  | -2.12551  | -6.01986  |
| H | 82 | -6.97449  | -3.89104  | -6.38644  |
| H | 83 | -7.87756  | -4.04309  | -4.84513  |
| H | 84 | -7.37163  | 2.5764    | -4.77424  |
| H | 85 | -6.01102  | 2.41337   | -3.6186   |
| H | 86 | -5.69545  | 2.56894   | -5.3838   |
| C | 87 | -5.43097  | -4.14682  | -1.03071  |
| C | 88 | -5.09701  | -5.03489  | -0.006672 |
| C | 89 | -6.03024  | -5.97633  | 0.428457  |
| C | 90 | -7.29396  | -6.02908  | -0.160911 |
| C | 91 | -7.62774  | -5.14145  | -1.18405  |
| C | 92 | -6.69486  | -4.20068  | -1.61891  |
| H | 93 | -4.10124  | -4.98383  | 0.462894  |
| H | 94 | -5.77238  | -6.67371  | 1.24331   |
| H | 95 | -8.03418  | -6.76822  | 0.189253  |
| H | 96 | -8.63101  | -5.1758   | -1.64136  |
| H | 97 | -6.9567   | -3.48578  | -2.41436  |
| O | 98 | -5.69872  | -1.52952  | -0.528493 |

**Figure S10:**

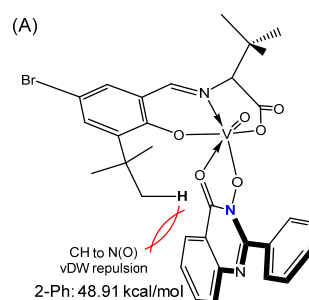

Total number of atoms: 73

|    |    |            |           |           |
|----|----|------------|-----------|-----------|
| O  | 1  | -9.89268   | 1.725128  | 2.128324  |
| Br | 2  | -16.879627 | 3.293322  | -1.095626 |
| V  | 3  | -10.156735 | 0.822623  | 0.709251  |
| O  | 4  | -8.293484  | 1.063385  | 0.172891  |
| O  | 5  | -7.191651  | 1.891952  | -1.599335 |
| O  | 6  | -12.009493 | 0.576433  | 1.259757  |
| N  | 7  | -10.458853 | 2.437923  | -0.356487 |
| C  | 8  | -8.112162  | 1.983514  | -0.818661 |
| C  | 9  | -8.486177  | 4.362512  | 1.121812  |
| C  | 10 | -7.572107  | 4.903533  | -1.144519 |
| C  | 11 | -9.930123  | 5.462384  | -0.589035 |
| C  | 12 | -11.625214 | 2.82033   | -0.707899 |
| C  | 13 | -12.923728 | 2.269864  | -0.240799 |
| C  | 14 | -8.82272   | 4.403419  | -0.383159 |
| C  | 15 | -9.259014  | 3.001398  | -0.926116 |
| C  | 16 | -14.073716 | 2.87294   | -0.763144 |
| C  | 17 | -15.336884 | 2.449401  | -0.376633 |
| C  | 18 | -15.470259 | 1.410794  | 0.535444  |
| C  | 19 | -14.344272 | 0.776915  | 1.080855  |
| C  | 20 | -13.060243 | 1.227775  | 0.695761  |
| O  | 21 | -10.430013 | -0.346991 | -0.826467 |
| O  | 22 | -9.758534  | -0.869843 | 1.567602  |
| C  | 23 | -10.230425 | -1.523035 | -0.612063 |
| N  | 24 | -9.834063  | -2.005421 | 0.617371  |
| C  | 25 | -14.531519 | -0.371472 | 2.077871  |
| C  | 26 | -9.632179  | -3.390453 | 0.829738  |
| C  | 27 | -10.193629 | -3.899987 | -1.258335 |
| C  | 28 | -10.409973 | -2.567411 | -1.633343 |
| C  | 29 | -10.375549 | -4.893812 | -2.222402 |

|   |    |            |           |           |
|---|----|------------|-----------|-----------|
| C | 30 | -10.759592 | -4.570514 | -3.524837 |
| C | 31 | -10.969668 | -3.239756 | -3.882142 |
| C | 32 | -10.797273 | -2.233037 | -2.933964 |
| N | 33 | -9.82739   | -4.264055 | -0.085854 |
| C | 34 | -13.848313 | -0.059005 | 3.431775  |
| C | 35 | -16.017957 | -0.657046 | 2.415141  |
| C | 36 | -13.962166 | -1.687599 | 1.49582   |
| C | 37 | -9.151251  | -3.852541 | 2.160952  |
| C | 38 | -8.308487  | -3.064234 | 2.955937  |
| C | 39 | -7.863085  | -3.521388 | 4.196414  |
| C | 40 | -9.511415  | -5.123152 | 2.630183  |
| C | 41 | -9.06659   | -5.582147 | 3.869908  |
| C | 42 | -8.244392  | -4.779374 | 4.656669  |
| H | 43 | -10.965766 | -1.179305 | -3.213092 |
| H | 44 | -9.382807  | 4.128536  | 1.735862  |
| H | 45 | -7.70547   | 3.605292  | 1.35578   |
| H | 46 | -8.103081  | 5.345177  | 1.477506  |
| H | 47 | -7.731345  | 4.893787  | -2.24622  |
| H | 48 | -6.673049  | 4.285962  | -0.927913 |
| H | 49 | -7.313287  | 5.948467  | -0.861438 |
| H | 50 | -10.24777  | 5.525984  | -1.653932 |
| H | 51 | -10.831556 | 5.252275  | 0.02779   |
| H | 52 | -9.580384  | 6.477272  | -0.294905 |
| H | 53 | -11.680277 | 3.652929  | -1.42704  |
| H | 54 | -9.459139  | 3.130618  | -2.015886 |
| H | 55 | -13.985744 | 3.699914  | -1.486473 |
| H | 56 | -16.487916 | 1.102617  | 0.815537  |
| H | 57 | -10.206806 | -5.948989 | -1.950445 |
| H | 58 | -10.893593 | -5.369712 | -4.273601 |
| H | 59 | -11.271595 | -2.984093 | -4.911994 |
| H | 60 | -14.208676 | 0.90634   | 3.853367  |
| H | 61 | -12.741638 | 0.004298  | 3.361501  |
| H | 62 | -14.065693 | -0.847605 | 4.186459  |
| H | 63 | -16.519862 | 0.223843  | 2.876066  |
| H | 64 | -16.112894 | -1.48985  | 3.147582  |
| H | 65 | -16.603318 | -0.96375  | 1.519057  |
| H | 66 | -14.440983 | -1.940192 | 0.522936  |
| H | 67 | -12.865869 | -1.646496 | 1.320088  |

|   |    |            |           |          |
|---|----|------------|-----------|----------|
| H | 68 | -14.140194 | -2.545588 | 2.182046 |
| H | 69 | -7.959312  | -2.080375 | 2.604045 |
| H | 70 | -7.196989  | -2.890435 | 4.808888 |
| H | 71 | -10.159189 | -5.774942 | 2.020153 |
| H | 72 | -9.362721  | -6.58324  | 4.226124 |
| H | 73 | -7.887805  | -5.142522 | 5.635205 |

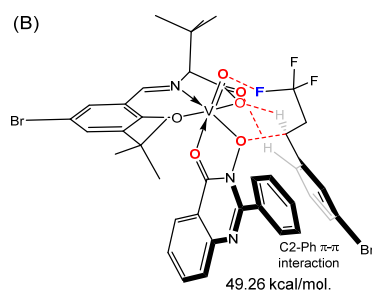

Total number of atoms: 93

|    |    |          |           |           |
|----|----|----------|-----------|-----------|
| C  | 1  | 8.579242 | -3.117952 | -1.302424 |
| H  | 2  | 8.772933 | -4.011327 | -1.938549 |
| C  | 3  | 7.429179 | -0.230696 | -1.109211 |
| C  | 4  | 6.919579 | 1.053798  | -0.914724 |
| C  | 5  | 5.554528 | 1.249269  | -0.716135 |
| C  | 6  | 4.699679 | 0.150116  | -0.700259 |
| C  | 7  | 5.212852 | -1.133106 | -0.883871 |
| C  | 8  | 7.097441 | -2.790815 | -1.316395 |
| C  | 9  | 6.578667 | -1.343003 | -1.107974 |
| O  | 10 | 6.718976 | -5.913477 | -2.186401 |
| H  | 11 | 8.511805 | -0.351577 | -1.26515  |
| Br | 12 | 8.092006 | 2.547416  | -0.924801 |
| Br | 13 | 3.758921 | -8.800725 | -9.048691 |
| V  | 14 | 5.427642 | -5.056176 | -2.8902   |
| O  | 15 | 4.616772 | -4.741539 | -1.140629 |
| O  | 16 | 2.744925 | -5.25258  | -0.016641 |
| O  | 17 | 6.186694 | -5.441387 | -4.642364 |
| N  | 18 | 4.269542 | -6.636985 | -2.907274 |
| H  | 19 | 6.125532 | -8.080962 | -1.188551 |
| H  | 20 | 5.149137 | 2.263638  | -0.56642  |
| H  | 21 | 3.617402 | 0.292949  | -0.539246 |
| H  | 22 | 4.520307 | -1.991635 | -0.865282 |
| C  | 23 | 9.084458 | -3.406208 | 0.108712  |

|   |    |          |            |           |
|---|----|----------|------------|-----------|
| H | 24 | 2.767691 | -9.5225    | -2.090318 |
| H | 25 | 2.471385 | -6.987348  | -1.965014 |
| H | 26 | 3.18259  | -8.031543  | -3.903607 |
| H | 27 | 3.171928 | -8.522089  | -6.171129 |
| H | 28 | 9.176828 | -2.29337   | -1.745164 |
| H | 29 | 5.598109 | -7.112324  | 0.231574  |
| H | 30 | 3.177228 | -7.451606  | 1.127838  |
| H | 31 | 1.944038 | -8.252101  | 0.09529   |
| H | 32 | 3.203103 | -9.221458  | 0.91968   |
| H | 33 | 4.510933 | -9.442202  | -2.533714 |
| H | 34 | 4.001593 | -10.313941 | -1.06578  |
| H | 35 | 5.971337 | -6.876396  | -8.961268 |
| H | 36 | 5.642906 | -8.898298  | 0.321643  |
| C | 37 | 3.593356 | -5.582013  | -0.814595 |
| C | 38 | 5.400634 | -8.042007  | -0.346863 |
| C | 39 | 3.018943 | -8.263127  | 0.384212  |
| C | 40 | 3.796773 | -9.409537  | -1.681494 |
| C | 41 | 3.967289 | -7.262246  | -3.981973 |
| C | 42 | 4.562649 | -7.077232  | -5.333849 |
| C | 43 | 3.943263 | -8.115989  | -0.848019 |
| C | 44 | 3.541062 | -6.851422  | -1.679252 |
| C | 45 | 4.01599  | -7.842062  | -6.370028 |
| C | 46 | 4.524261 | -7.756581  | -7.658565 |
| C | 47 | 5.595833 | -6.914448  | -7.928306 |
| C | 48 | 6.174575 | -6.131977  | -6.918287 |
| C | 49 | 5.64669  | -6.225354  | -5.609869 |
| O | 50 | 4.002502 | -4.012256  | -3.706499 |
| O | 51 | 6.422456 | -3.359999  | -2.830672 |
| C | 52 | 4.372002 | -2.916759  | -4.049342 |
| N | 53 | 5.646403 | -2.480281  | -3.769189 |
| C | 54 | 7.356611 | -5.220309  | -7.255403 |
| C | 55 | 6.089508 | -1.274099  | -4.38738  |
| C | 56 | 4.083592 | -0.770547  | -5.200088 |
| C | 57 | 3.514318 | -1.975354  | -4.783435 |
| C | 58 | 3.277447 | 0.138252   | -5.888634 |
| C | 59 | 1.935571 | -0.147682  | -6.148052 |
| C | 60 | 1.383103 | -1.356014  | -5.726055 |
| C | 61 | 2.173868 | -2.275443  | -5.039633 |



|   |    |           |           |           |
|---|----|-----------|-----------|-----------|
| C | 62 | 7.53241   | -0.91436  | -4.325461 |
| H | 63 | 3.710037  | 1.090477  | -6.237564 |
| H | 64 | 1.312726  | 0.58112   | -6.694146 |
| H | 65 | 0.32382   | -1.584039 | -5.934009 |
| H | 66 | 1.740706  | -3.231309 | -4.700133 |
| H | 67 | 6.572043  | -3.485395 | -0.635844 |
| F | 68 | 8.455382  | -4.5061   | 0.676878  |
| F | 69 | 8.890961  | -2.323936 | 0.956597  |
| F | 70 | 10.447019 | -3.676513 | 0.095487  |
| N | 71 | 5.312771  | -0.470732 | -5.014229 |
| C | 72 | 6.922565  | -3.742971 | -7.134717 |
| C | 73 | 7.889077  | -5.401472 | -8.700189 |
| H | 74 | 8.224213  | -6.445551 | -8.894809 |
| C | 75 | 7.916121  | 0.432542  | -4.285057 |
| C | 76 | 9.262604  | 0.79272   | -4.239315 |
| C | 77 | 10.248599 | -0.190426 | -4.256956 |
| C | 78 | 8.535922  | -1.889814 | -4.368898 |
| C | 79 | 9.883788  | -1.532275 | -4.332489 |
| H | 80 | 11.313858 | 0.094037  | -4.22516  |
| H | 81 | 8.274191  | -2.956369 | -4.451632 |
| H | 82 | 10.662462 | -2.312925 | -4.368908 |
| H | 83 | 7.149813  | 1.225943  | -4.277289 |
| H | 84 | 9.546607  | 1.857678  | -4.192432 |
| C | 85 | 8.566393  | -5.499603 | -6.329979 |
| H | 86 | 6.095614  | -3.502404 | -7.840054 |
| H | 87 | 6.560637  | -3.492512 | -6.116538 |
| H | 88 | 7.762735  | -3.048959 | -7.361159 |
| H | 89 | 7.130859  | -5.130545 | -9.468814 |
| H | 90 | 8.768769  | -4.746415 | -8.89038  |
| H | 91 | 8.867197  | -6.570725 | -6.371056 |
| H | 92 | 8.373573  | -5.253883 | -5.264688 |
| H | 93 | 9.454219  | -4.899198 | -6.629711 |

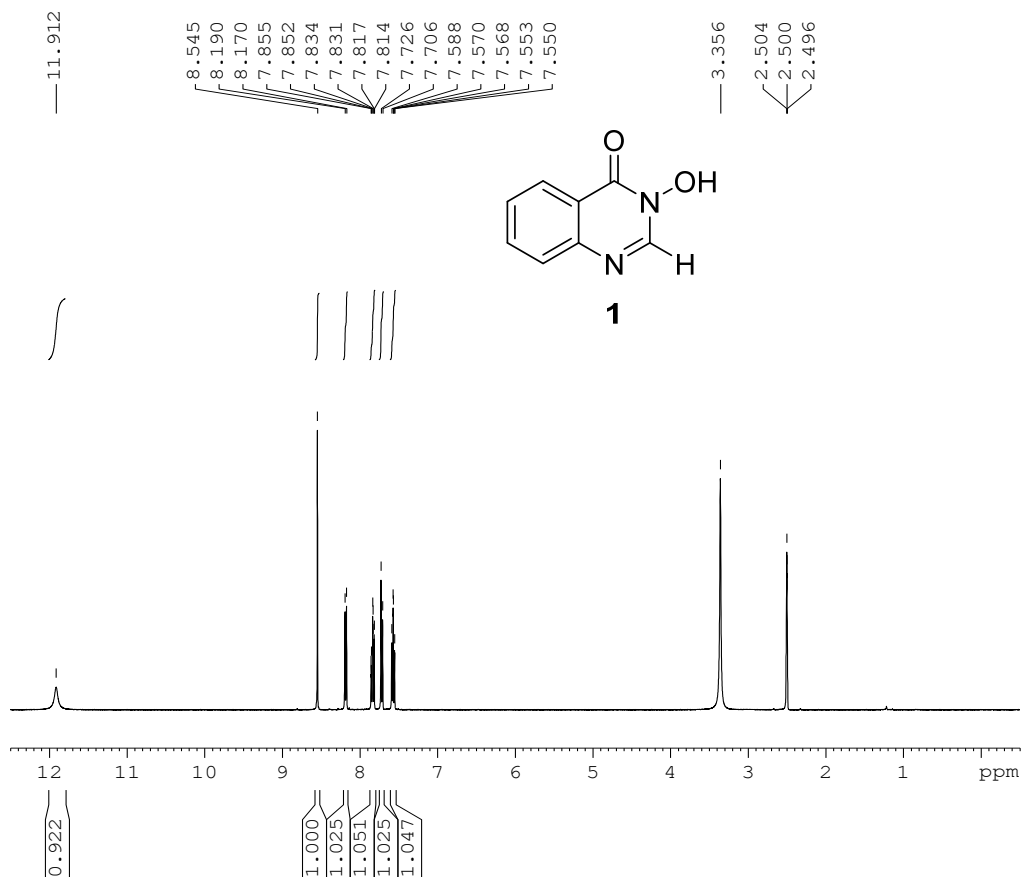

```

NAME          NHOH N=C
EXPNO         1
PROCNO        1
Date_         20210427
Time          12.10
INSTRUM       spect
PROBHD        5 mm DUL 13C-1
PULPROG       zg30
TD            32768
SOLVENT       DMSO
NS            32
DS            0
SWH           6410.256 Hz
FIDRES        0.195625 Hz
AQ            2.5559540 sec
RG            4
DW            78.000 usec
DE            6.00 usec
TE            300.0 K
D1            2.00000000 sec
TD0           1

```

```

===== CHANNEL f1 =====
NUC1           1H
P1             10.00 usec
PL1            -2.40 dB
SFO1          400.1528010 MHz
SI            16384
SF            400.1500035 MHz
WDW            EM
SSB            0
LB             0.00 Hz
GB             0
PC             1.00

```

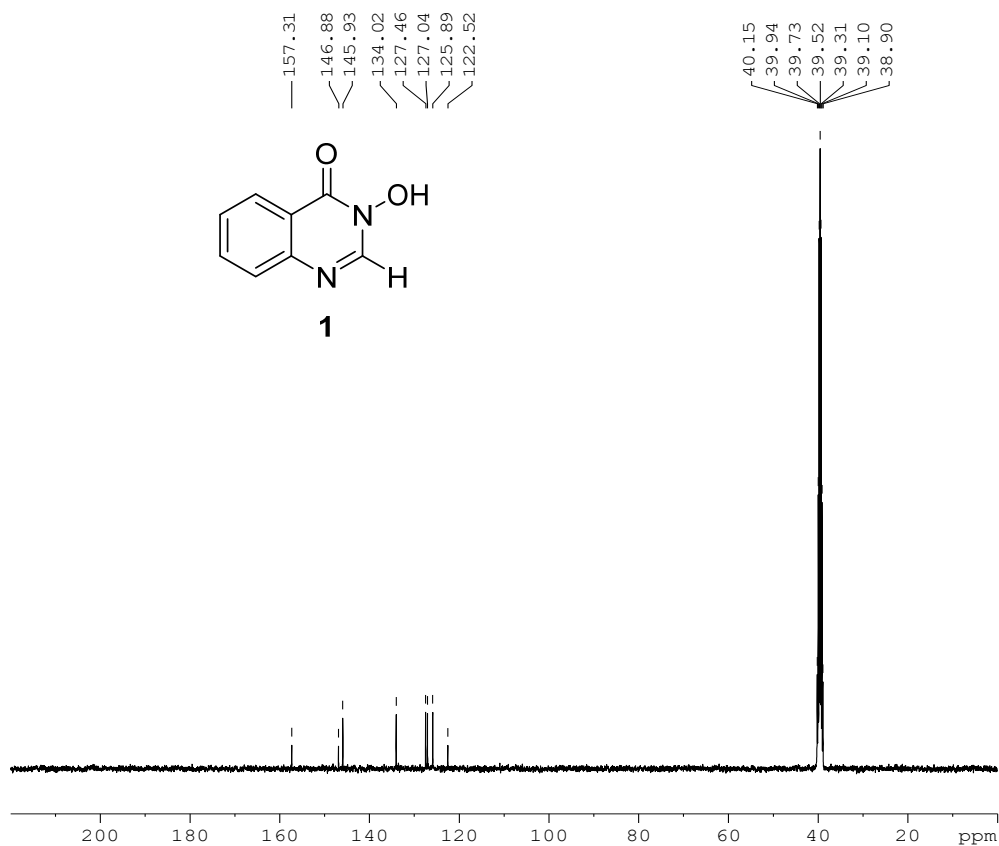

```

NAME          NHOH N=C
EXPNO         2
PROCNO        1
Date_         20210427
Time          12.14
INSTRUM       spect
PROBHD        5 mm DUL 13C-1
PULPROG       zgpg30
TD            65536
SOLVENT       DMSO
NS            200
DS            0
SWH           22727.273 Hz
FIDRES        0.346791 Hz
AQ            1.4418420 sec
RG            57
DW            22.000 usec
DE            6.00 usec
TE            300.0 K
D1            2.00000000 sec
d11           0.03000000 sec
DELTA         1.89999998 sec
TD0           1

```

```

===== CHANNEL f1 =====
NUC1           13C
P1             9.70 usec
PL1            -0.50 dB
SFO1          100.6288660 MHz

```

```

===== CHANNEL f2 =====
CPDPRG2       waltz16
NUC2           1H
PCPD2         90.00 usec
PL2           -2.40 dB
PL12          15.10 dB
PL13          18.10 dB
SFO2          400.1516010 MHz
SI            32768
SF            100.6178431 MHz
WDW            EM
SSB            0
LB             3.00 Hz
GB             0
PC             1.00

```

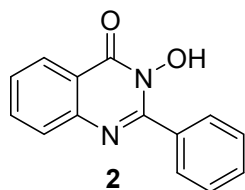

—11.671

8.208  
8.205  
8.188  
8.185  
7.864  
7.857  
7.853  
7.848  
7.843  
7.839  
7.834  
7.826  
7.823  
7.753  
7.733  
7.566  
7.565  
7.567  
7.554  
7.546  
7.543  
7.537  
7.525  
7.518  
7.507  
7.503  
7.496

2.504  
2.500  
2.495

NAME 20220802  
EXPNO 3  
PROCNO 1  
Date\_ 20220802  
Time 1.19  
INSTRUM spect  
PROBHD 5 mm DUL 13C-1  
PULPROG zg30  
TD 32768  
SOLVENT DMSO  
NS 53  
DS 0  
SWH 6410.256 Hz  
FIDRES 0.195625 Hz  
AQ 2.5559540 sec  
RG 4  
DW 78.000 usec  
DE 6.00 usec  
TE 300.0 K  
D1 2.00000000 sec  
TD0 1

===== CHANNEL f1 =====  
NUC1 1H  
P1 10.00 usec  
PL1 -2.40 dB  
SFO1 400.1528010 MHz  
SI 16384  
SF 400.1500035 MHz  
WDW EM  
SSB 0  
LB 0.00 Hz  
GB 0  
PC 1.00

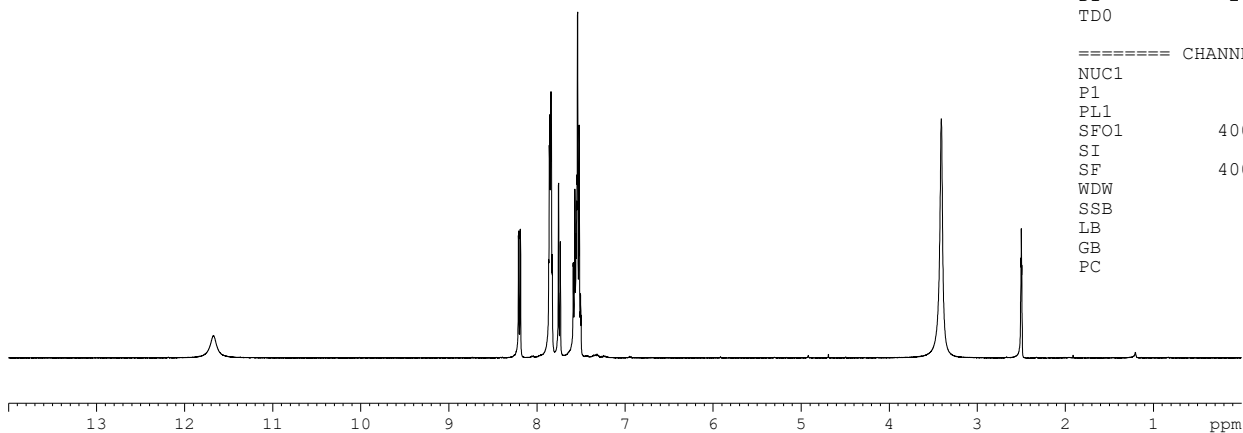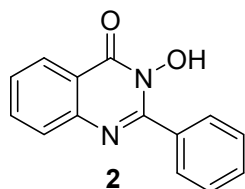

—158.314

—153.343

—146.202

134.206

132.831

130.272

129.443

127.851

127.547

126.797

125.927

121.416

40.124  
39.916  
39.708  
39.499  
39.290  
39.082  
38.874

NAME 20220802  
EXPNO 5  
PROCNO 1  
Date\_ 20220802  
Time 1.31  
INSTRUM spect  
PROBHD 5 mm DUL 13C-1  
PULPROG zgpg30  
TD 65536  
SOLVENT DMSO  
NS 2896  
DS 0  
SWH 22727.273 Hz  
FIDRES 0.346791 Hz  
AQ 1.4418420 sec  
RG 57  
DW 22.000 usec  
DE 6.00 usec  
TE 300.0 K  
D1 2.00000000 sec  
d11 0.03000000 sec  
DELTA 1.89999998 sec  
TD0 1

===== CHANNEL f1 =====  
NUC1 13C  
P1 9.70 usec  
PL1 -0.50 dB  
SFO1 100.6288660 MHz

===== CHANNEL f2 =====  
CPDPRG2 waltz16  
NUC2 1H  
PCPD2 90.00 usec  
PL2 -2.40 dB  
PL12 15.10 dB  
PL13 18.10 dB  
SFO2 400.1516010 MHz  
SI 32768  
SF 100.6178457 MHz  
WDW EM  
SSB 0  
LB 3.00 Hz  
GB 0  
PC 1.00

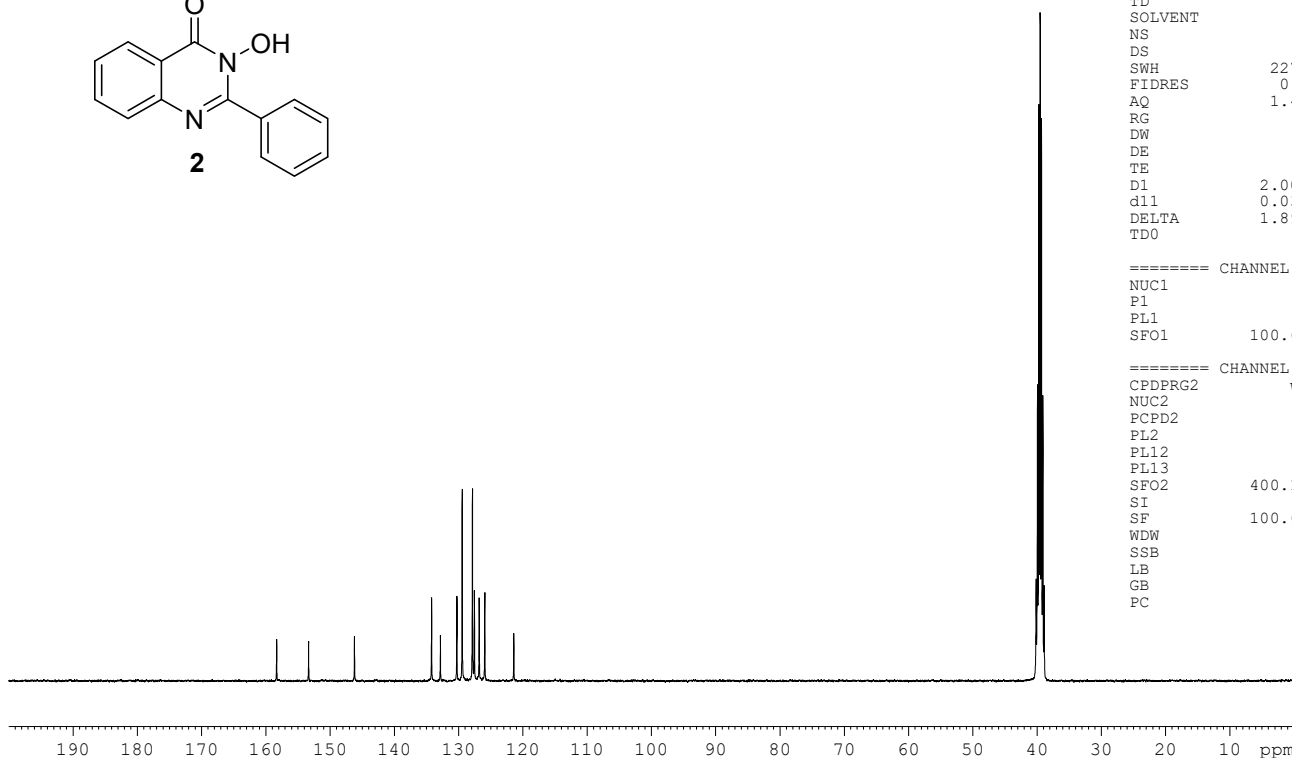

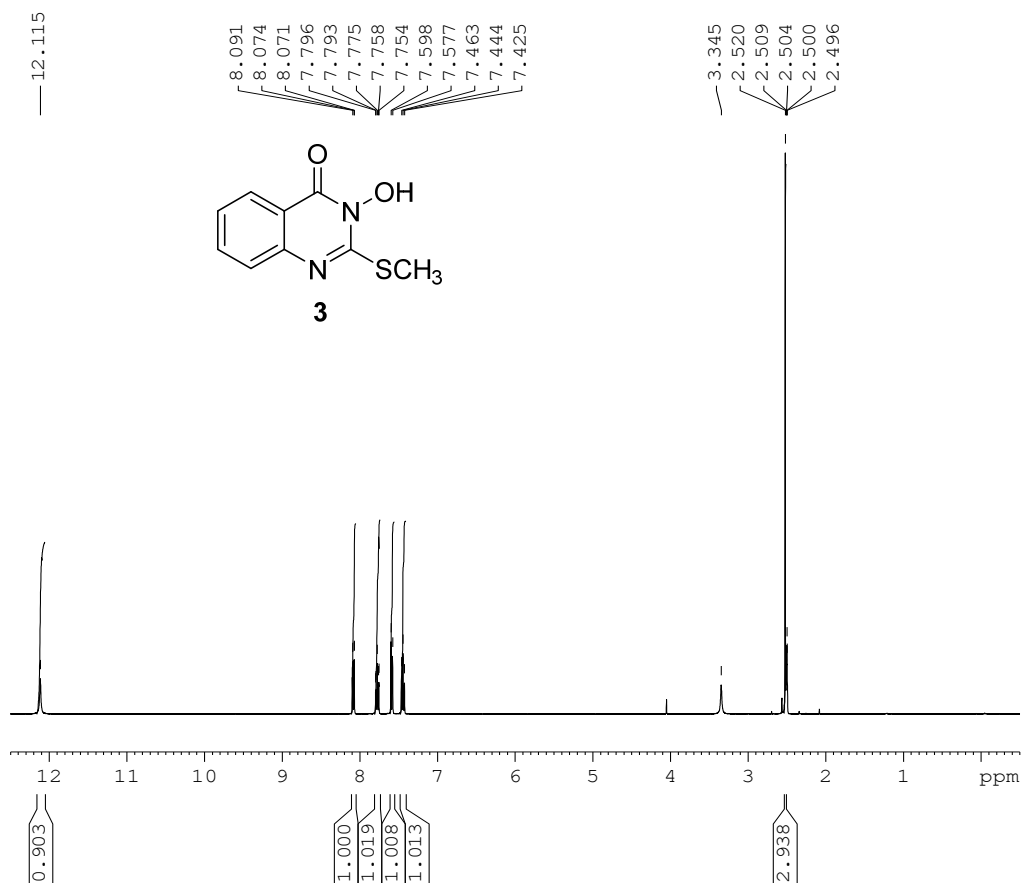

```

NAME          s-ch3
EXPNO         10
PROCNO        1
Date_         20210510
Time_         21.04
INSTRUM       spect
PROBHD        5 mm DUL 13C-1
PULPROG       zg30
TD            32768
SOLVENT       DMSO
NS            8
DS            0
SWH           6410.256 Hz
FIDRES        0.195625 Hz
AQ            2.5559540 sec
RG            4
DW            78.000 usec
DE            6.00 usec
TE            300.0 K
D1            2.00000000 sec
TD0           1

```

```

===== CHANNEL f1 =====
NUC1           1H
P1             10.00 usec
PL1            -2.40 dB
SFO1           400.1528010 MHz
SI             16384
SF             400.1500031 MHz
WDW            EM
SSB            0
LB             0.00 Hz
GB             0
PC             1.00

```

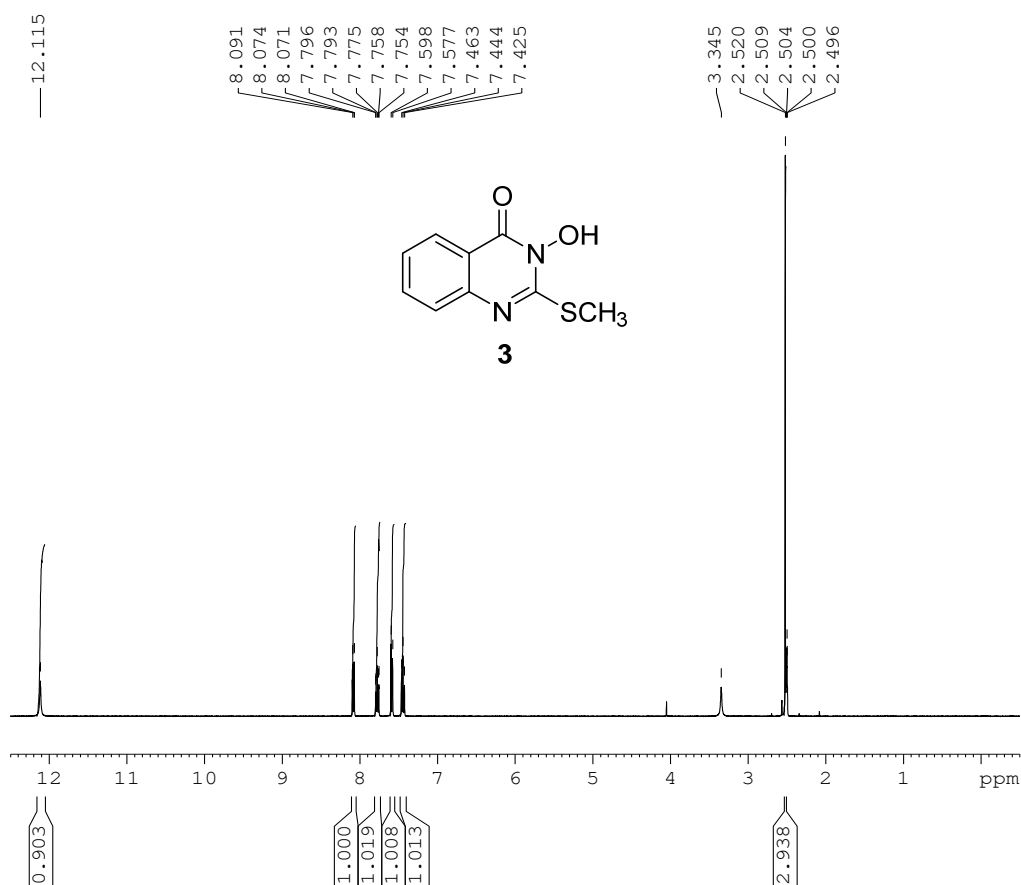

```

NAME          s-ch3
EXPNO         10
PROCNO        1
Date_         20210510
Time_         21.04
INSTRUM       spect
PROBHD        5 mm DUL 13C-1
PULPROG       zg30
TD            32768
SOLVENT       DMSO
NS            8
DS            0
SWH           6410.256 Hz
FIDRES        0.195625 Hz
AQ            2.5559540 sec
RG            4
DW            78.000 usec
DE            6.00 usec
TE            300.0 K
D1            2.00000000 sec
TD0           1

```

```

===== CHANNEL f1 =====
NUC1           1H
P1             10.00 usec
PL1            -2.40 dB
SFO1           400.1528010 MHz
SI             16384
SF             400.1500031 MHz
WDW            EM
SSB            0
LB             0.00 Hz
GB             0
PC             1.00

```

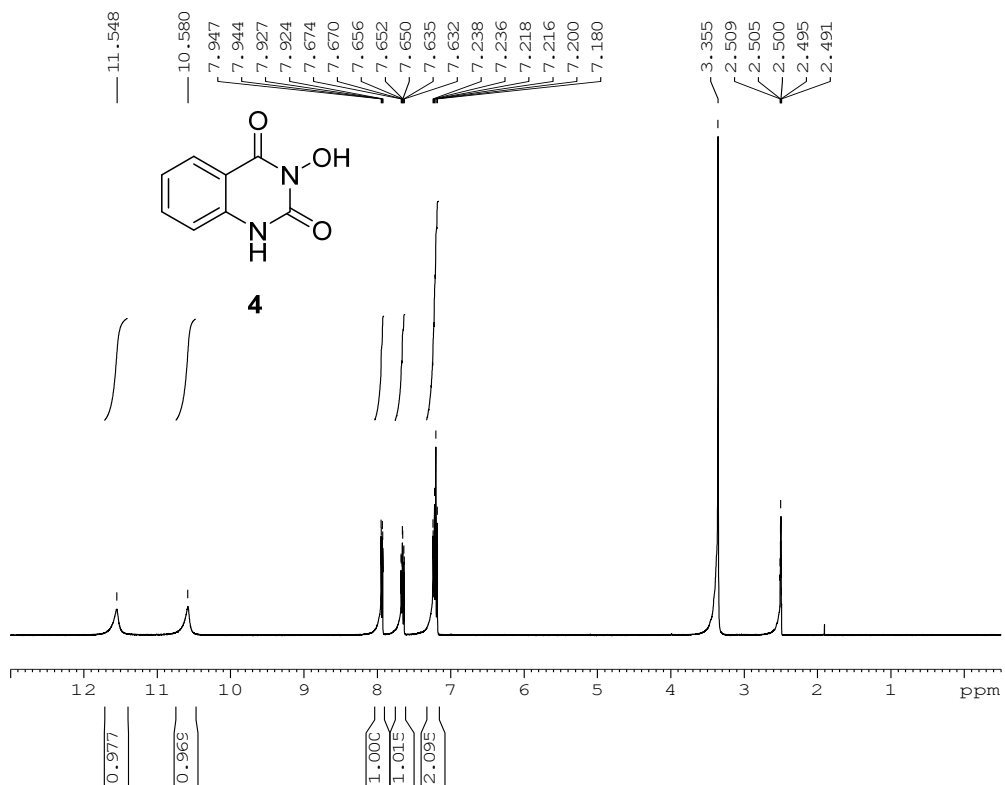

```

NAME          CIL-1-135
EXPNO         1
PROCNO        1
Date_         20201015
Time_         11.38
INSTRUM       spect
PROBHD        5 mm DUL 13C-1
PULPROG       zg30
TD            32768
SOLVENT       DMSO
NS            28
DS            0
SWH           6410.256 Hz
FIDRES        0.195625 Hz
AQ            2.5559540 sec
RG            4
DW            78.000 usec
DE            6.00 usec
TE            300.0 K
D1            2.00000000 sec
TD0           1

```

```

===== CHANNEL f1 =====
NUC1           1H
P1             10.00 usec
PL1            -2.40 dB
SFO1          400.1528010 MHz
SI             16384
SF            400.1500023 MHz
WDW            EM
SSB            0
LB             0.00 Hz
GB             0
PC             1.00

```

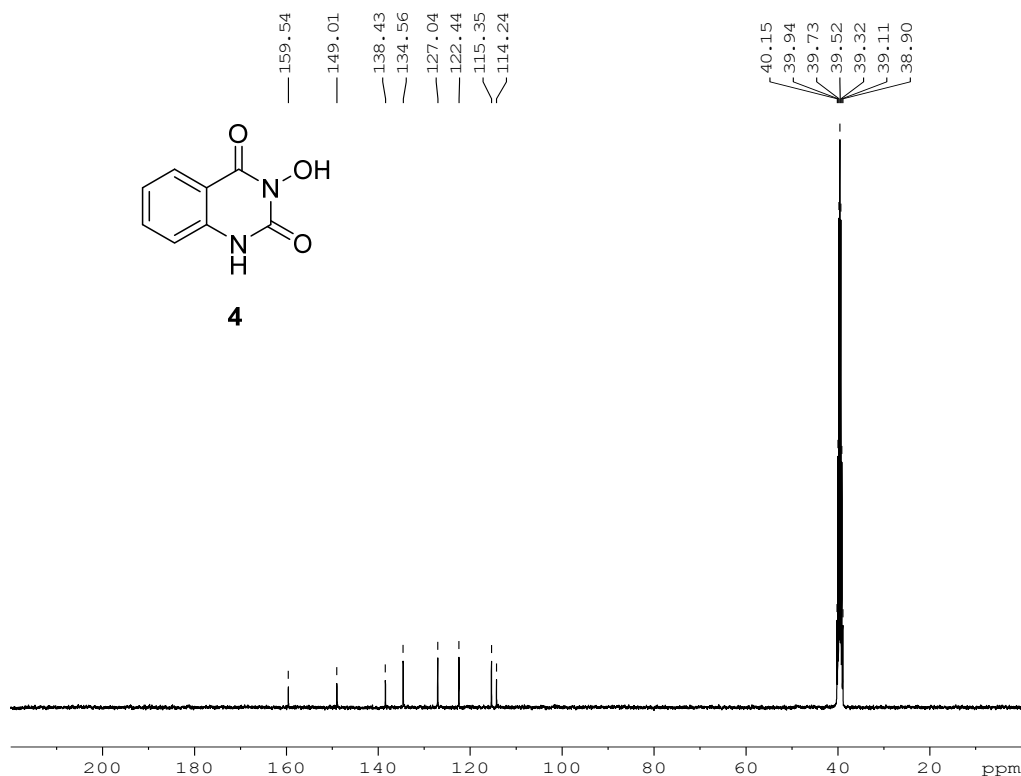

```

NAME          CIL-1-132
EXPNO         6
PROCNO        1
Date_         20201012
Time_         21.11
INSTRUM       spect
PROBHD        5 mm DUL 13C-1
PULPROG       zgpg30
TD            65536
SOLVENT       DMSO
NS            196
DS            0
SWH           22727.273 Hz
FIDRES        0.346791 Hz
AQ            1.4418420 sec
RG            57
DW            22.000 usec
DE            6.00 usec
TE            300.0 K
D1            2.00000000 sec
d11           0.03000000 sec
DELTA         1.89999999 sec
TD0           1

```

```

===== CHANNEL f1 =====
NUC1           13C
P1             9.70 usec
PL1            -0.50 dB
SFO1          100.6288660 MHz

```

```

===== CHANNEL f2 =====
CPDPRG2       waltz16
NUC2           1H
PCPD2         90.00 usec
PL2           -2.40 dB
PL12          15.10 dB
PL13          18.10 dB
SFO2          400.1516010 MHz
SI            32768
SF            100.6178403 MHz
WDW            EM
SSB            0
LB             3.00 Hz
GB             0
PC             1.00

```

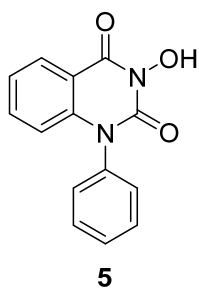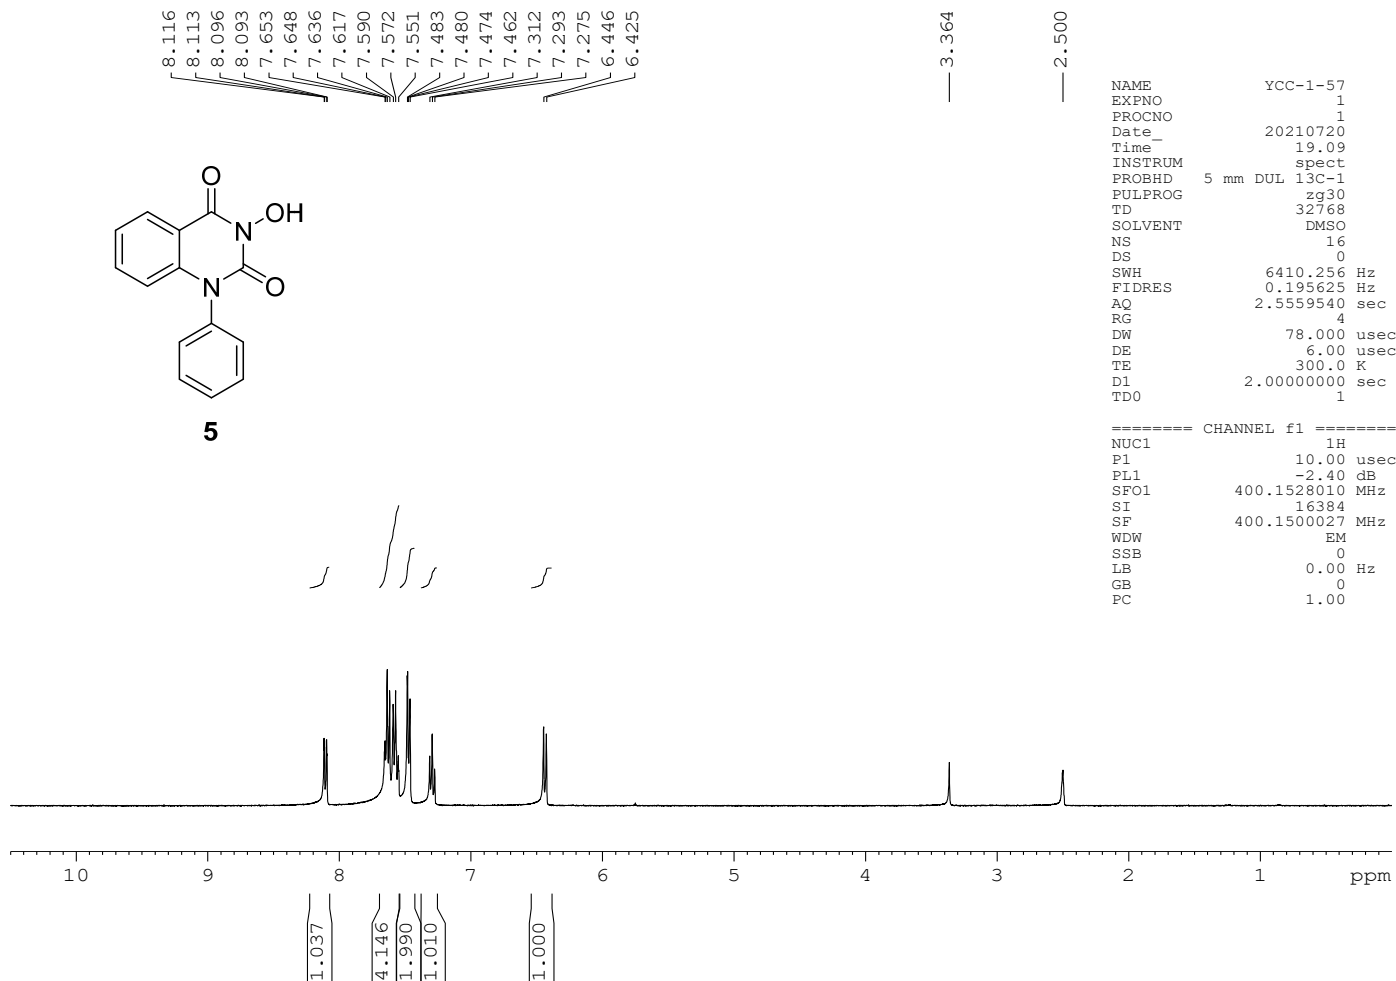

```

NAME      YCC-1-57
EXPNO     1
PROCNO    1
Date_     20210720
Time_     19.09
INSTRUM   spect
PROBHD    5 mm DUL 13C-1
PULPROG   zg30
TD         32768
SOLVENT   DMSO
NS         16
DS         0
SWH        6410.256 Hz
FIDRES     0.195625 Hz
AQ         2.5559540 sec
RG         4
DW         78.000 usec
DE         6.00 usec
TE         300.0 K
D1         2.00000000 sec
TD0        1
  
```

```

===== CHANNEL f1 =====
NUC1       1H
P1         10.00 usec
PL1        -2.40 dB
SFO1       400.1528010 MHz
SI         16384
SF         400.1500027 MHz
WDW        EM
SSB        0
LB         0.00 Hz
GB         0
PC         1.00
  
```

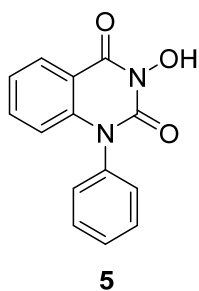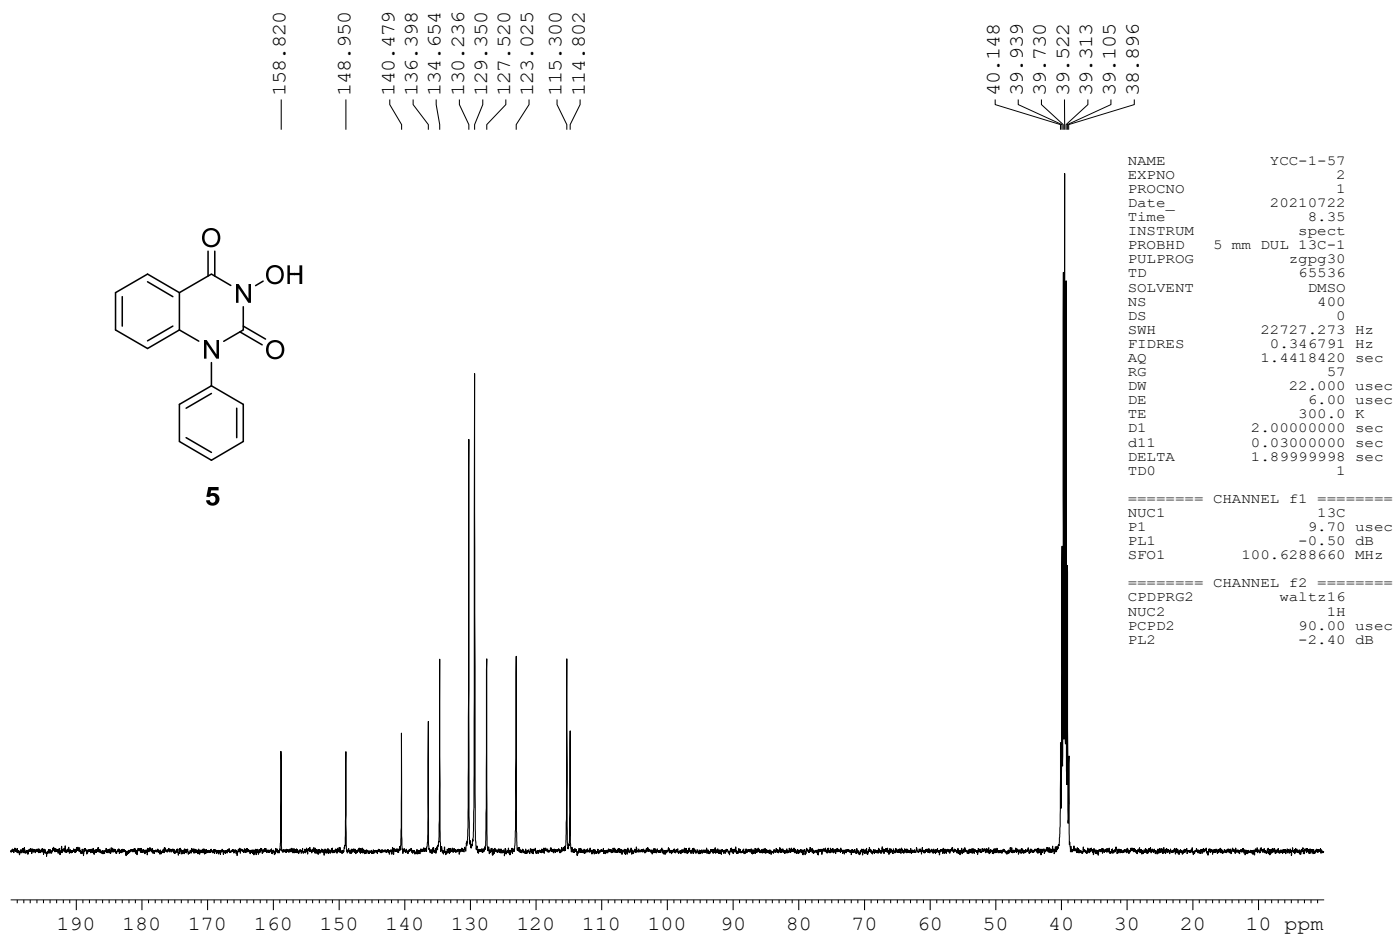

```

NAME      YCC-1-57
EXPNO     2
PROCNO    1
Date_     20210722
Time_     8.35
INSTRUM   spect
PROBHD    5 mm DUL 13C-1
PULPROG   zgpg30
TD         65536
SOLVENT   DMSO
NS         400
DS         0
SWH        22727.273 Hz
FIDRES     0.346791 Hz
AQ         1.4418420 sec
RG         57
DW         22.000 usec
DE         6.00 usec
TE         300.0 K
D1         2.00000000 sec
d11        0.03000000 sec
DELTA      1.899999998 sec
TD0        1
  
```

```

===== CHANNEL f1 =====
NUC1       13C
P1         9.70 usec
PL1        -0.50 dB
SFO1       100.6288660 MHz
  
```

```

===== CHANNEL f2 =====
CPDPRG2    waltz16
NUC2        1H
PCPD2       90.00 usec
PL2        -2.40 dB
  
```

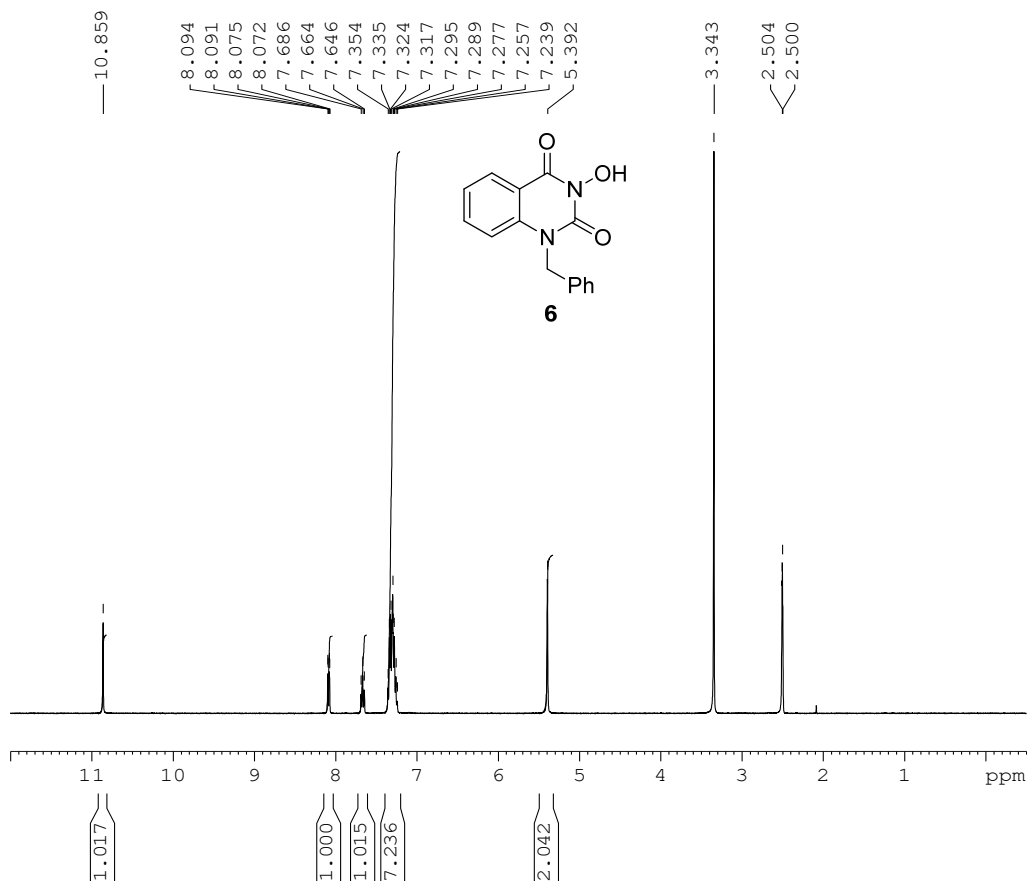

```

NAME          CIL-1-185
EXPNO         5
PROCNO        1
Date_         20210224
Time_         19.57
INSTRUM       spect
PROBHD        5 mm DUL 13C-1
PULPROG       zg30
TD            32768
SOLVENT       DMSO
NS            24
DS            0
SWH           6410.256 Hz
FIDRES        0.195625 Hz
AQ            2.5559540 sec
RG            4
DW            78.000 usec
DE            6.00 usec
TE            300.0 K
D1            2.00000000 sec
TD0           1

```

```

===== CHANNEL f1 =====
NUC1          1H
P1            10.00 usec
PL1           -2.40 dB
SFO1          400.1528010 MHz
SI            16384
SF            400.1500027 MHz
WDW           EM
SSB           0
LB            0.00 Hz
GB            0
PC            1.00

```

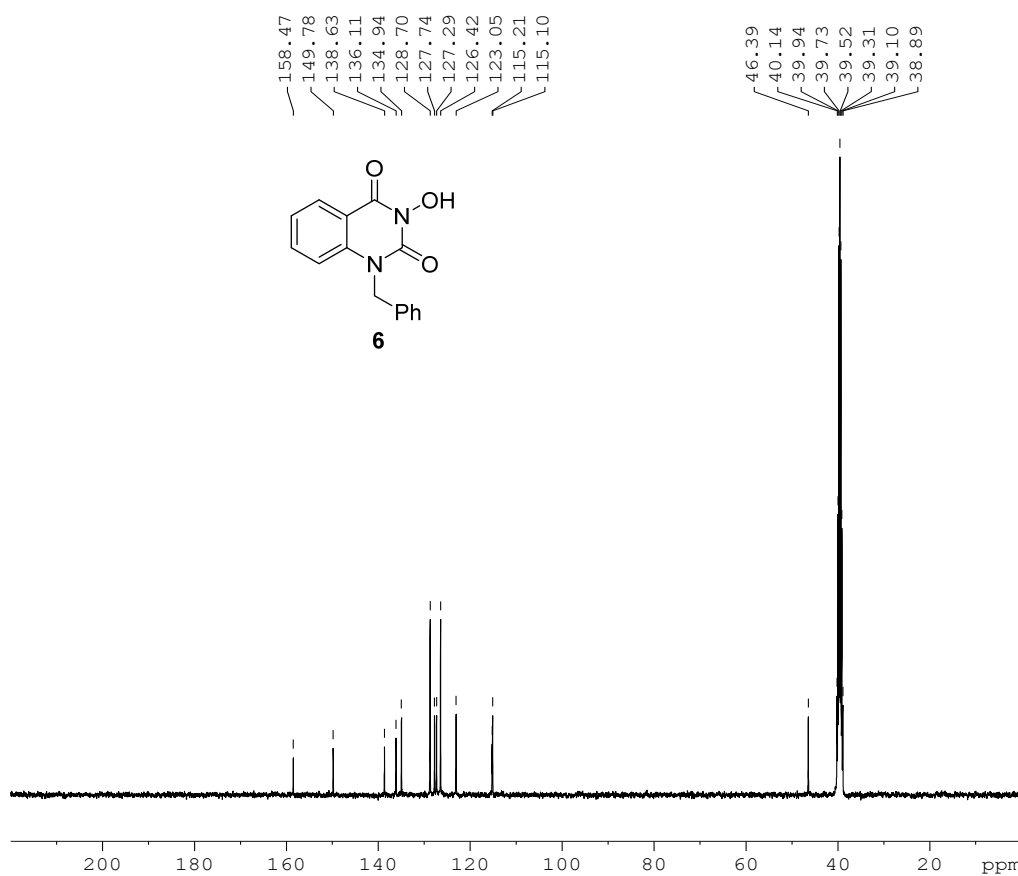

```

NAME          CIL-1-185
EXPNO         4
PROCNO        1
Date_         20210222
Time_         21.06
INSTRUM       spect
PROBHD        5 mm DUL 13C-1
PULPROG       zgpg30
TD            65536
SOLVENT       DMSO
NS            400
DS            0
SWH           22727.273 Hz
FIDRES        0.346791 Hz
AQ            1.4418420 sec
RG            57
DW            22.000 usec
DE            6.00 usec
TE            300.0 K
D1            2.00000000 sec
d11           0.03000000 sec
DELTA         1.89999998 sec
TD0           1

```

```

===== CHANNEL f1 =====
NUC1          13C
P1            9.70 usec
PL1           -0.50 dB
SFO1          100.6288660 MHz

```

```

===== CHANNEL f2 =====
CPDPRG2       waltz16
NUC2          1H
PCPD2         90.00 usec
PL2           -2.40 dB
PL12          15.10 dB
PL13          18.10 dB
SFO2          400.1516010 MHz
SI            32768
SF            100.6178466 MHz
WDW           EM
SSB           0
LB            3.00 Hz
GB            0
PC            1.00

```

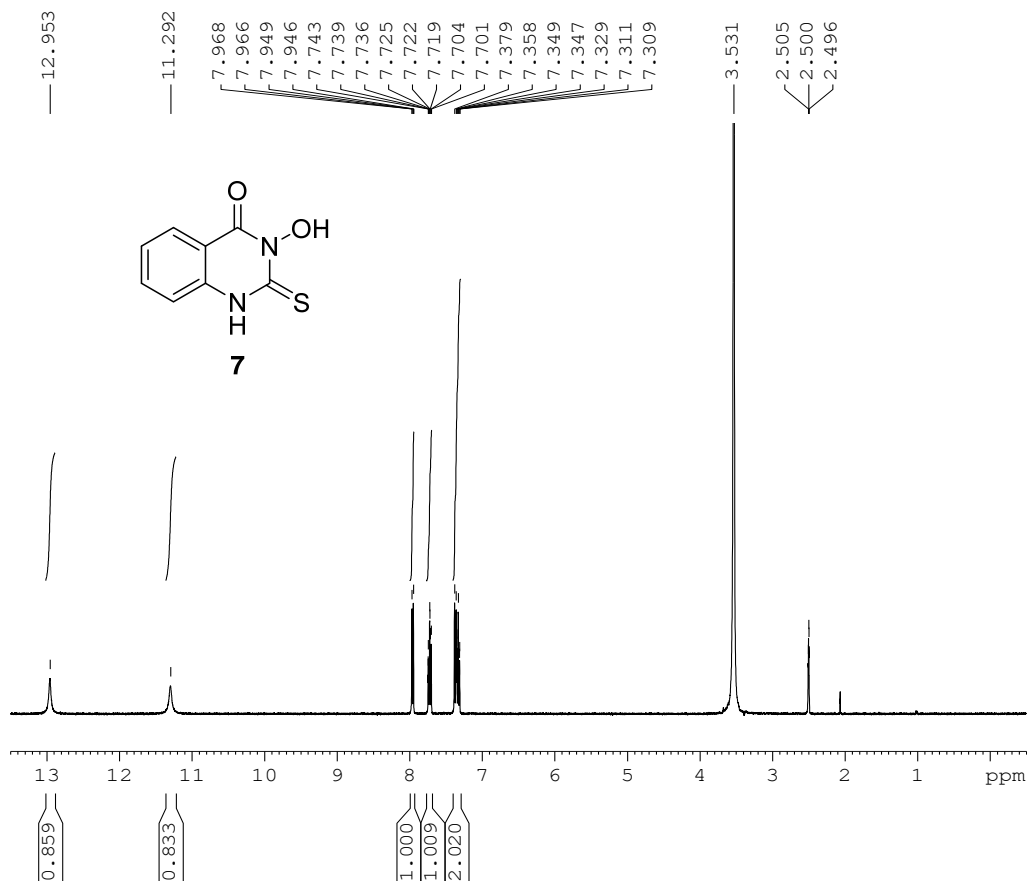

```

NAME          NHS-OH
EXPNO          8
PROCNO         1
Date_          20210509
Time           17.39
INSTRUM        spect
PROBHD         5 mm DUL 13C-1
PULPROG        zg30
TD             32768
SOLVENT        DMSO
NS             10
DS             0
SWH            6410.256 Hz
FIDRES         0.195625 Hz
AQ             2.5559540 sec
RG             4
DW             78.000 usec
DE             6.00 usec
TE             300.0 K
D1             2.00000000 sec
TD0            1

```

```

===== CHANNEL f1 =====
NUC1           1H
P1             10.00 usec
PL1            -2.40 dB
SFO1           400.1528010 MHz
SI            16384
SF            400.1500039 MHz
WDW            EM
SSB            0
LB             0.00 Hz
GB             0
PC             1.00

```

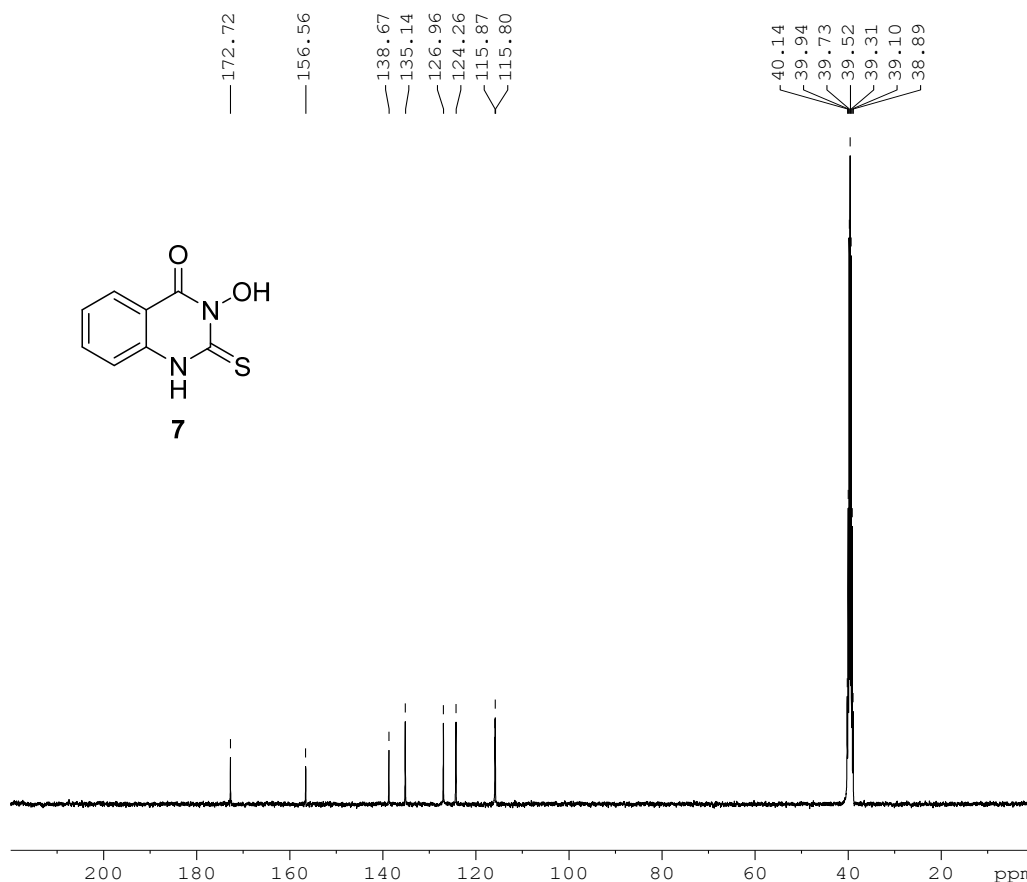

```

NAME          CIL-1-174
EXPNO          10
PROCNO         1
Date_          20210201
Time           21.12
INSTRUM        spect
PROBHD         5 mm DUL 13C-1
PULPROG        zgpg30
TD             65536
SOLVENT        DMSO
NS             720
DS             0
SWH            22727.273 Hz
FIDRES         0.346791 Hz
AQ             1.4418420 sec
RG             57
DW             22.000 usec
DE             6.00 usec
TE             300.0 K
D1             2.00000000 sec
d11            0.03000000 sec
DELTA          1.89999998 sec
TD0            1

```

```

===== CHANNEL f1 =====
NUC1           13C
P1             9.70 usec
PL1            -0.50 dB
SFO1           100.6288660 MHz

```

```

===== CHANNEL f2 =====
CPDPRG2        waltz16
NUC2           1H
PCPD2          90.00 usec
PL2            -2.40 dB
PL12           15.10 dB
PL13           18.10 dB
SFO2           400.1516010 MHz
SI            32768
SF            100.6178450 MHz
WDW            EM
SSB            0
LB             3.00 Hz
GB             0
PC             1.00

```



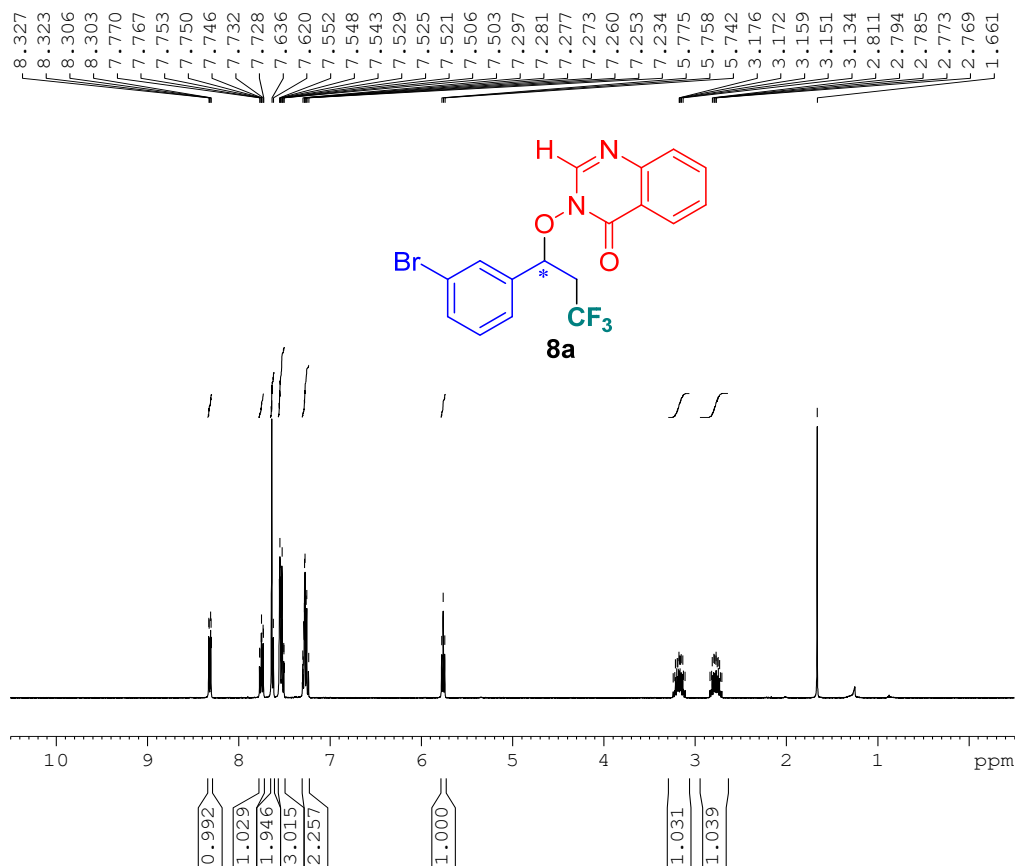

NAME CIL-1-206  
EXPNO 3  
PROCNO 1  
Date\_ 20210506  
Time\_ 11.47  
INSTRUM spect  
PROBHD 5 mm DUL 13C-1  
PULPROG zg30  
TD 32768  
SOLVENT CDCl3  
NS 16  
DS 0  
SWH 6410.256 Hz  
FIDRES 0.195625 Hz  
AQ 2.5559540 sec  
RG 4  
DW 78.000 usec  
DE 6.00 usec  
TE 300.0 K  
D1 2.00000000 sec  
TD0 1

===== CHANNEL f1 =====  
NUC1 1H  
P1 10.00 usec  
PL1 -2.40 dB  
SFO1 400.1528010 MHz  
SI 16384  
SF 400.1500092 MHz  
WDW EM  
SSB 0  
LB 0.00 Hz  
GB 0  
PC 1.00

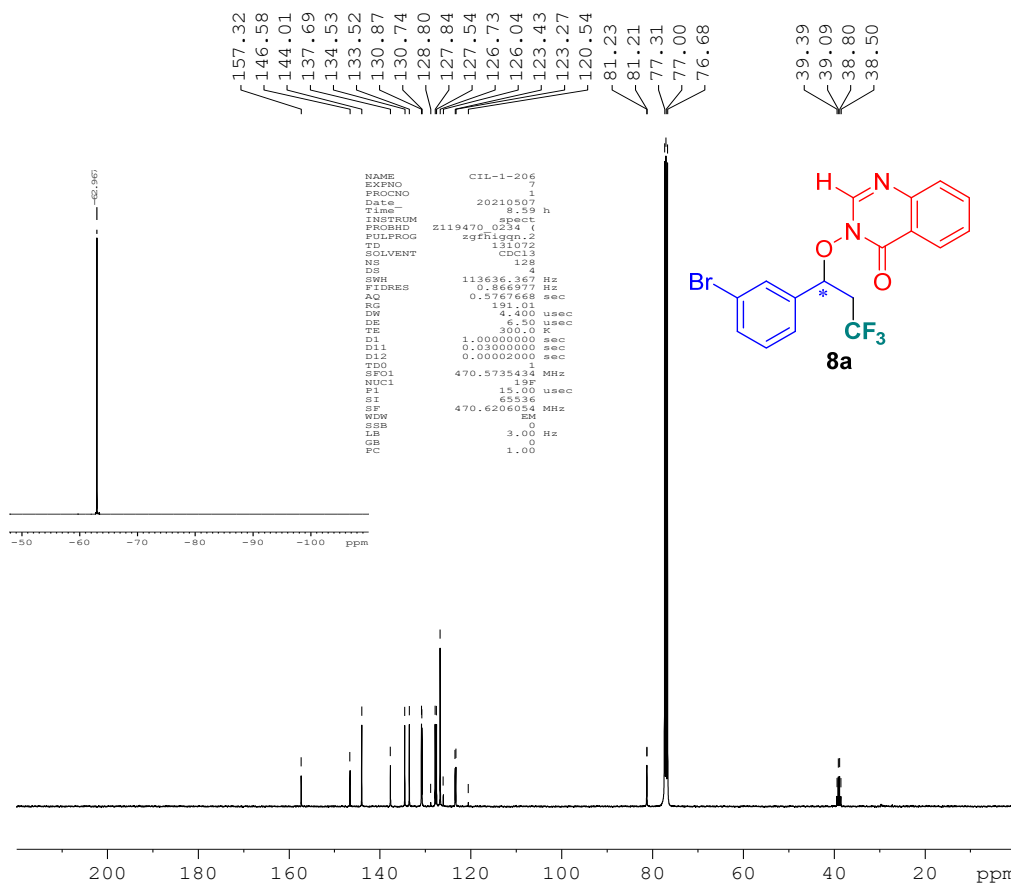

NAME CIL-1-206  
EXPNO 5  
PROCNO 1  
Date\_ 20210507  
Time\_ 23.55  
INSTRUM spect  
PROBHD 5 mm DUL 13C-1  
PULPROG zgpg30  
TD 65536  
SOLVENT CDCl3  
NS 10000  
DS 0  
SWH 22727.273 Hz  
FIDRES 0.346791 Hz  
AQ 1.4418420 sec  
RG 57  
DW 22.000 usec  
DE 6.00 usec  
TE 300.0 K  
D1 2.00000000 sec  
d11 0.03000000 sec  
DELTA 1.89999998 sec  
TD0 1

===== CHANNEL f1 =====  
NUC1 13C  
P1 9.70 usec  
PL1 -0.50 dB  
SFO1 100.6288660 MHz

===== CHANNEL f2 =====  
CPDPRG2 waltz16  
NUC2 1H  
PCPD2 90.00 usec  
PL2 -2.40 dB  
PL12 15.10 dB  
PL13 18.10 dB  
SFO2 400.1516010 MHz  
SI 32768  
SF 100.6178013 MHz  
WDW EM  
SSB 0  
LB 3.00 Hz  
GB 0  
PC 1.00

8.350  
8.347  
8.330  
8.327  
8.327  
7.789  
7.785  
7.768  
7.765  
7.750  
7.747  
7.710  
7.690  
7.542  
7.523  
7.505  
7.450  
7.444  
7.433  
7.412  
7.363  
7.343  
7.260  
6.961  
6.941  
6.922  
6.794  
6.768  
6.748  
5.678  
5.661  
5.644  
3.065  
3.049  
3.040  
3.024  
3.014  
3.002  
2.986  
2.977  
2.961  
2.952  
2.936  
2.650  
2.632  
2.624  
2.607  
2.599  
2.587  
2.581  
2.569  
2.561  
2.556  
2.544  
2.536  
2.518

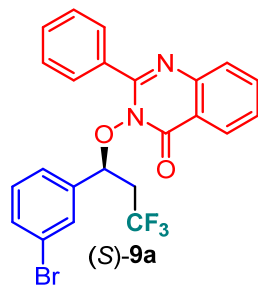

NAME 20211229  
EXPNO 3  
PROCNO 1  
Date\_ 20211229  
Time 14.29  
INSTRUM spect  
PROBHD 5 mm DUL 13C-1  
PULPROG zg30  
TD 32768  
SOLVENT CDC13  
NS 16  
DS 0  
SWH 6410.256 Hz  
FIDRES 0.195625 Hz  
AQ 2.5559540 sec  
RG 4  
DW 78.000 usec  
DE 6.00 usec  
TE 300.0 K  
D1 2.00000000 sec  
TD0 1

===== CHANNEL f1 =====  
NUC1 1H  
P1 10.00 usec  
PL1 -2.40 dB  
SFO1 400.1528010 MHz  
SI 16384  
SF 400.1500092 MHz  
WDW EM  
SSB 0  
LB 0.00 Hz  
GB 0  
PC 1.00

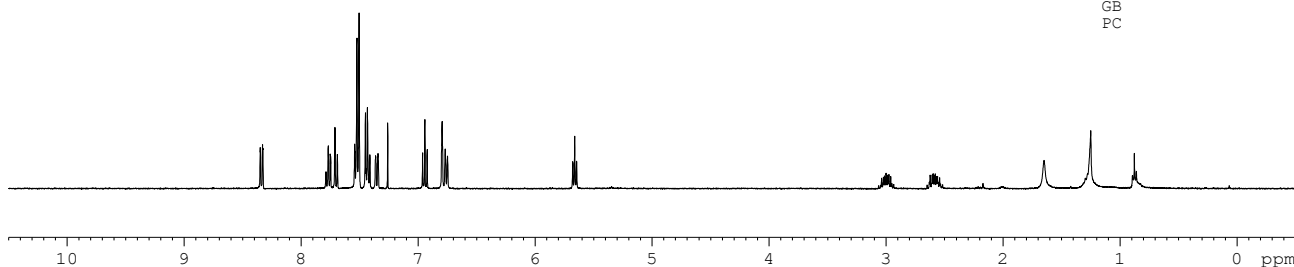

158.312 1.005  
153.471  
146.286  
136.422 1.037  
134.600 1.008  
133.006 4.036  
132.295 2.015  
130.918 0.990  
130.707  
129.913 1.008  
129.580 1.978  
128.134  
127.979  
127.445  
127.093  
126.728  
125.832  
123.628 1.000  
122.737  
122.110  
121.426

80.409  
80.388  
77.250  
76.996  
76.741

38.433  
38.198  
37.965  
37.731

NAME chem211230.001  
EXPNO 3  
PROCNO 1  
Date\_ 20211229  
Time 16.06 h  
INSTRUM spect  
PROBHD Z119470\_0234 ( )  
PULPROG zgfhg30.2  
TD 131072  
SOLVENT CDC13  
NS 128  
DS 4  
SWH 113636.367 Hz  
FIDRES 0.866977 Hz  
AQ 0.5767668 sec  
RG 191.01  
DW 4.400 usec  
DE 6.50 usec  
TE 299.2 K  
D1 1.00000000 sec  
D11 0.03000000 sec  
D12 0.00002000 sec  
TD0 1  
SFO1 470.5735434 MHz  
NUC1 13C  
P1 15.00 usec  
SI 65536  
SF 470.6206054 MHz  
WDW EM  
SSB 0  
LB 3.00 Hz  
GB 0  
PC 1.00

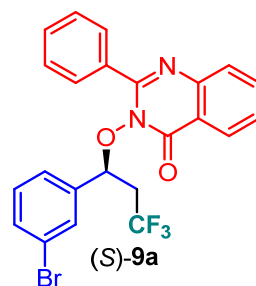

NAME chem211230.001  
EXPNO 2  
PROCNO 2  
Date\_ 20211230  
Time 13.18 h  
INSTRUM spect  
PROBHD Z119470\_0234 ( )  
PULPROG zgpg30  
TD 32768  
SOLVENT CDC13  
NS 2485  
DS 0  
SWH 29761.904 Hz  
FIDRES 0.908261 Hz  
AQ 0.5505524 sec  
RG 191.01  
DW 16.800 usec  
DE 6.50 usec  
TE 299.9 K  
D1 2.00000000 sec  
D11 0.03000000 sec  
TD0 1  
SFO1 125.7785374 MHz  
NUC1 13C  
P1 10.00 usec  
SI 32768  
SF 125.7653353 MHz  
WDW EM  
SSB 0  
LB 2.00 Hz  
GB 0  
PC 1.00

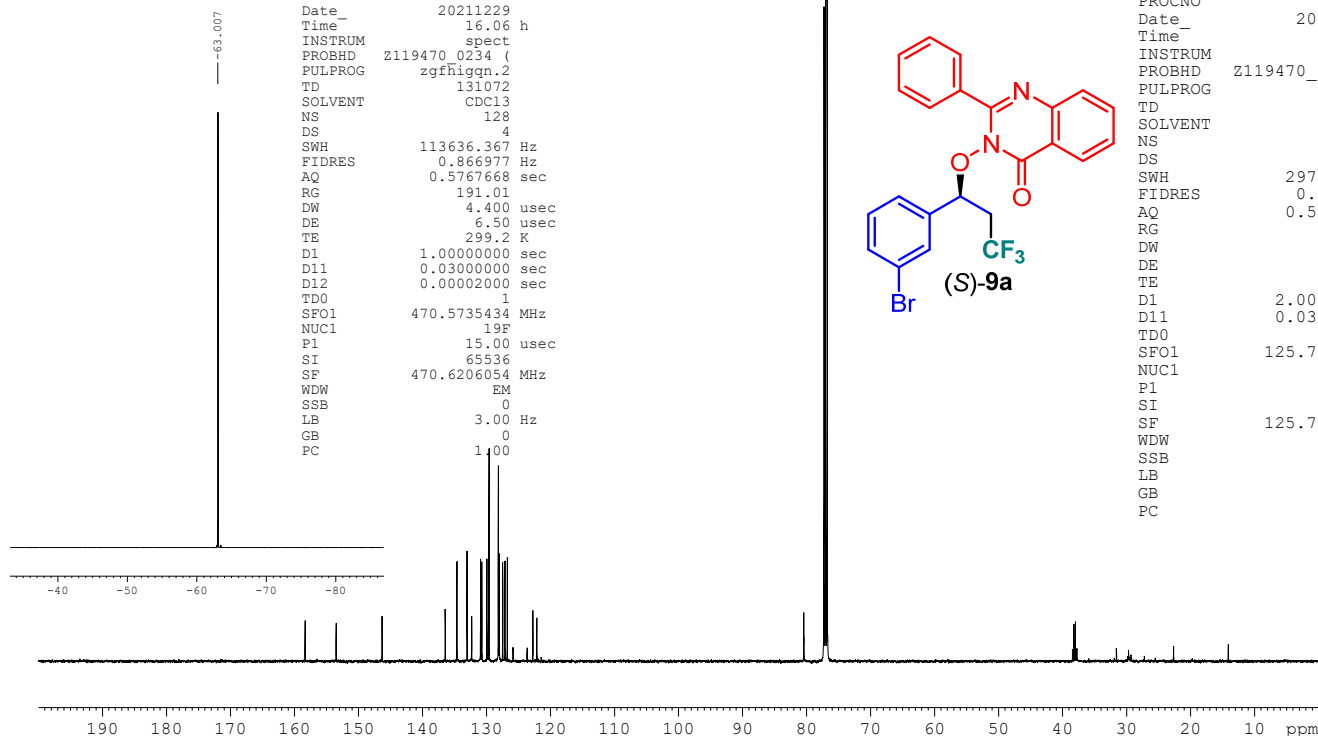

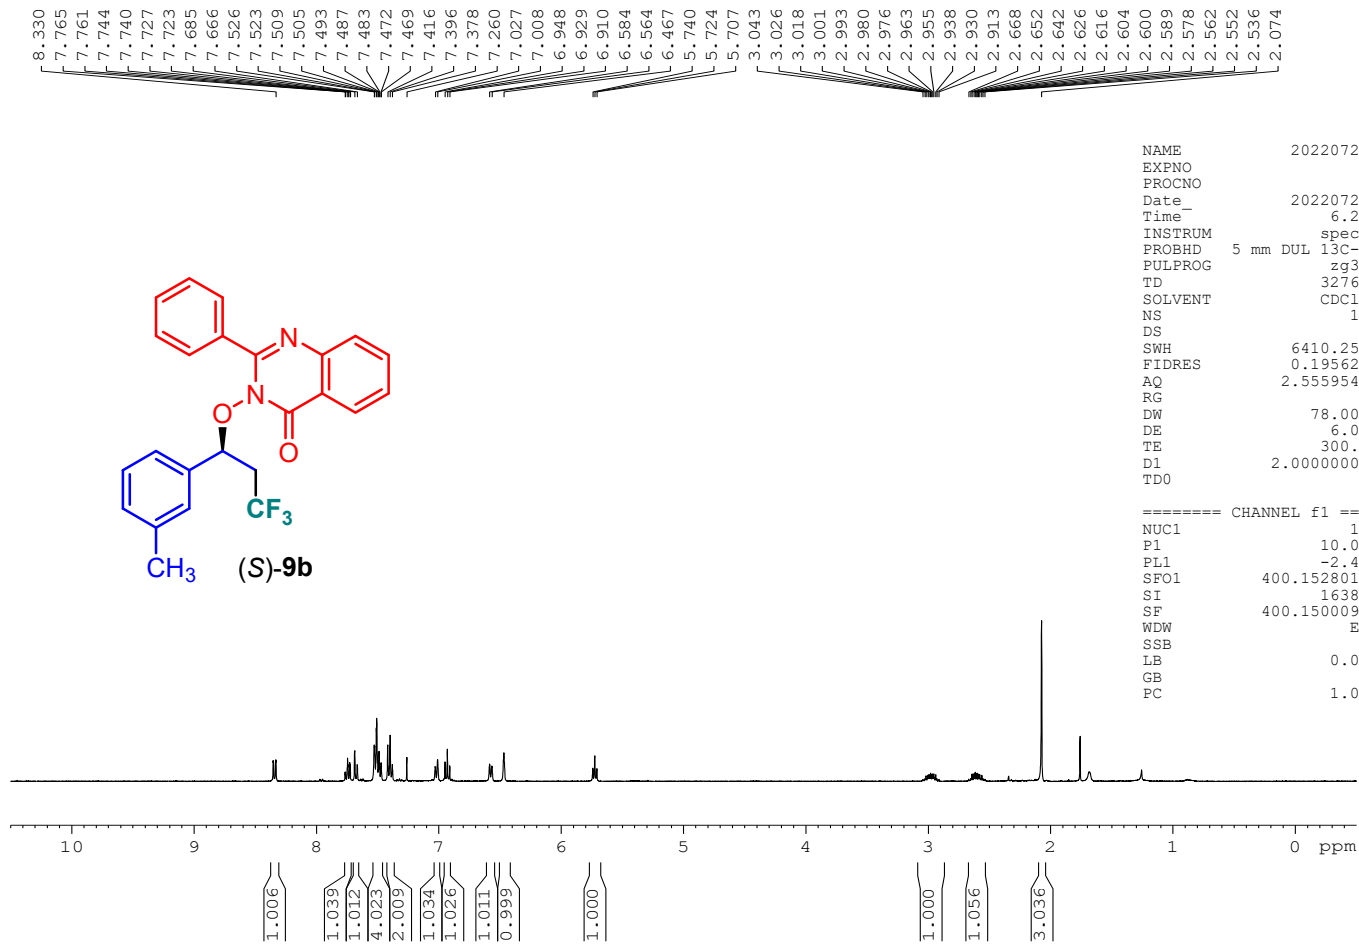

NAME 20220728  
 EXPNO 6  
 PROCNO 1  
 Date\_ 20220728  
 Time\_ 6.27  
 INSTRUM spect  
 PROBHD 5 mm DUL 13C-1  
 PULPROG zg30  
 TD 32768  
 SOLVENT CDCl3  
 NS 13  
 DS 0  
 SWH 6410.256 Hz  
 FIDRES 0.195625 Hz  
 AQ 2.5559540 sec  
 RG 4  
 DW 78.000 usec  
 DE 6.00 usec  
 TE 300.0 K  
 D1 2.00000000 sec  
 TD0 1

===== CHANNEL f1 =====  
 NUC1 1H  
 P1 10.00 usec  
 PL1 -2.40 dB  
 SFO1 400.1528010 MHz  
 SI 16384  
 SF 400.1500092 MHz  
 WDW EM  
 SSB 0  
 LB 0.00 Hz  
 GB 0  
 PC 1.00

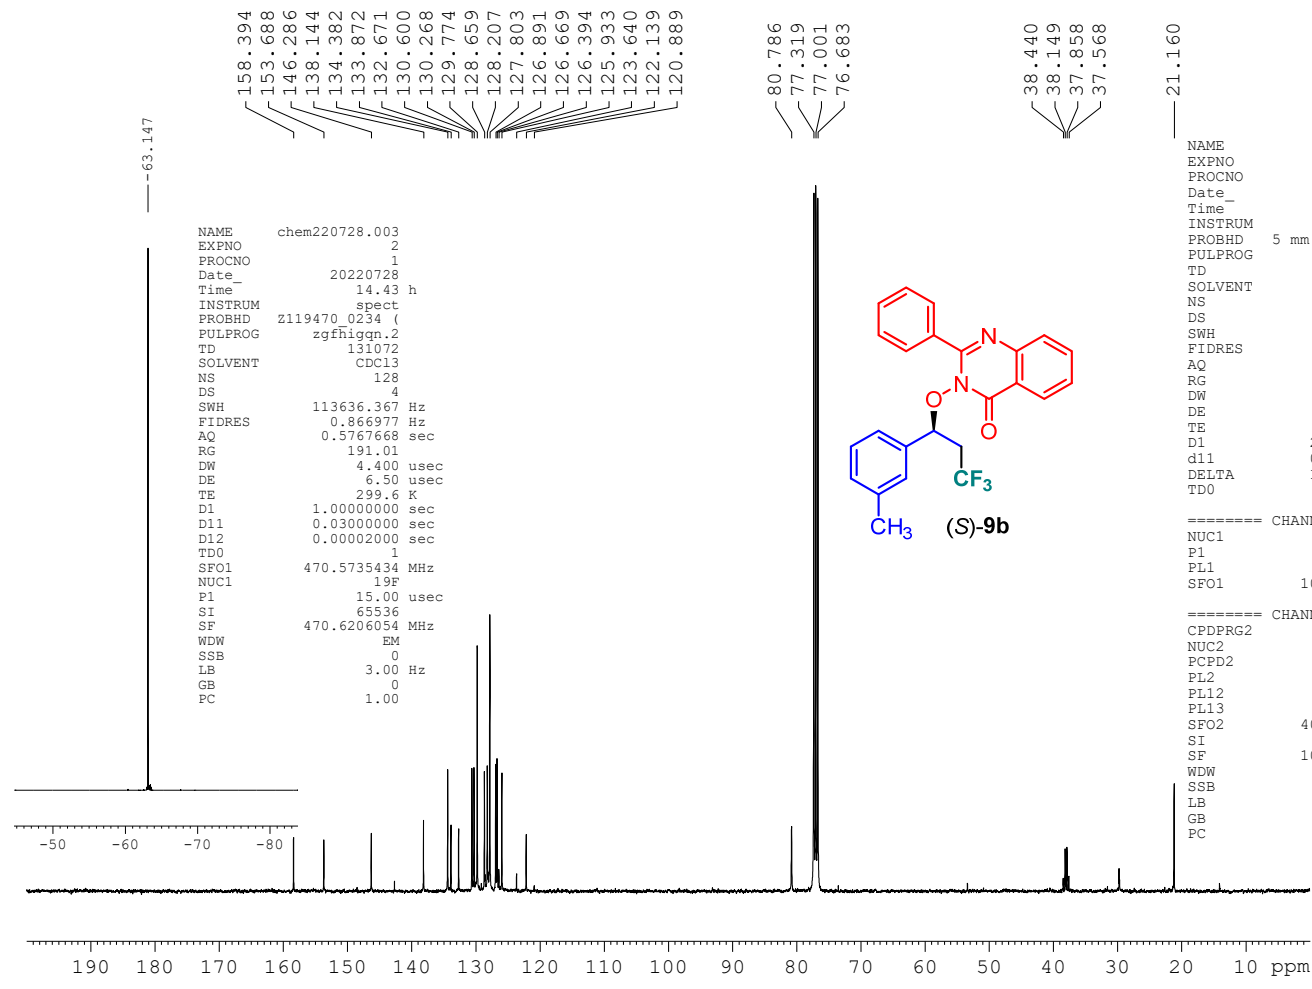

NAME 20220728  
 EXPNO 3  
 PROCNO 1  
 Date\_ 20220728  
 Time\_ 2.55  
 INSTRUM spect  
 PROBHD 5 mm DUL 13C-1  
 PULPROG zgpg30  
 TD 65536  
 SOLVENT CDCl3  
 NS 2400  
 DS 0  
 SWH 22727.273 Hz  
 FIDRES 0.346791 Hz  
 AQ 1.4418420 sec  
 RG 57  
 DW 22.000 usec  
 DE 6.00 usec  
 TE 300.0 K  
 D1 2.00000000 sec  
 d11 0.03000000 sec  
 DELTA 1.89999998 sec  
 TD0 1

===== CHANNEL f1 =====  
 NUC1 13C  
 P1 9.70 usec  
 PL1 -0.50 dB  
 SFO1 100.6288660 MHz

===== CHANNEL f2 =====  
 CPDPRG2 waltz16  
 NUC2 1H  
 PCPD2 90.00 usec  
 PL2 -2.40 dB  
 PL12 15.10 dB  
 PL13 18.10 dB  
 SFO2 400.1516010 MHz  
 SI 32768  
 SF 100.6178025 MHz  
 WDW EM  
 SSB 0  
 LB 3.00 Hz  
 GB 0  
 PC 1.00

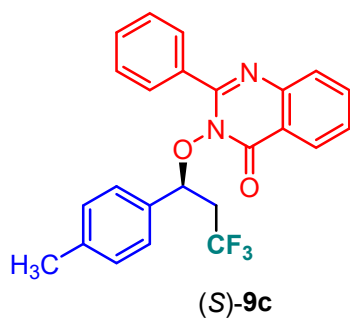

```

NAME      4-methyl styrene +N
EXPNO     1
PROCNO     1
Date_      20220106
Time       13.49
INSTRUM    spect
PROBHD     5 mm DUL 13C-1
PULPROG    zg30
TD         32768
SOLVENT    CDCl3
NS         9
DS         0
SWH        6410.256 Hz
FIDRES     0.195625 Hz
AQ         2.5559540 sec
RG         4
DW         78.000 usec
DE         6.00 usec
TE         300.0 K
D1         2.00000000 sec
TD0        1

```

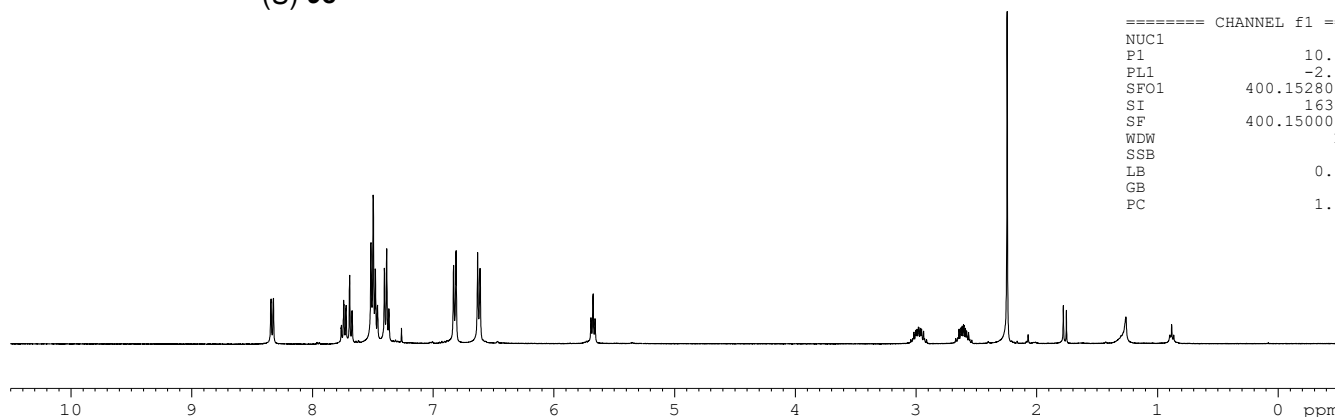

```

===== CHANNEL f1 =====
NUC1      1H
P1        10.00 usec
PL1       -2.40 dB
SFO1      400.1528010 MHz
SI        16384
SF        400.1500092 MHz
WDW       EM
SSB       0
LB        0.00 Hz
GB        0
PC        1.00

```

Integration values for the 1H NMR spectrum:

0.962, 2.029, 2.029, 2.021, 2.029, 2.025, 1.000, 1.019, 1.028, 3.007

Chemical shift values (ppm) for the 1H NMR spectrum:

158.399, 153.739, 146.331, 139.664, 134.884, 132.703, 130.983, 130.321, 129.821, 129.105, 128.677, 128.557, 128.461, 128.261, 127.863, 127.746, 126.888, 126.704, 126.108, 123.905, 122.160, 121.702

Chemical shift values (ppm) for the 1H NMR spectrum:

80.747, 80.726, 80.701, 80.678, 77.255, 77.001, 76.747

Chemical shift values (ppm) for the 1H NMR spectrum:

38.275, 38.043, 37.810, 37.578, 21.152

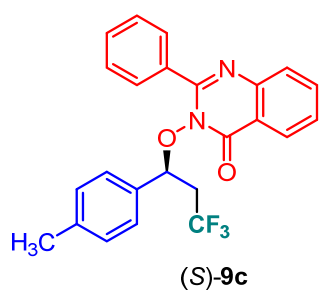

```

NAME      chem220112.001
EXPNO     2
PROCNO     2
Date_      20220113
Time       6.22 h
INSTRUM    spect
PROBHD     Z119470_0234 (
PULPROG    zgpgg30
TD         32768
SOLVENT    CDCl3
NS         6000
DS         0
SWH        29761.904 Hz
FIDRES     0.908261 Hz
AQ         0.5505524 sec
RG         191.01
DW         16.800 usec
DE         6.50 usec
TE         299.1 K
D1         2.00000000 sec
D11        0.03000000 sec
D12        0.00002000 sec
TD0        1
SFO1      125.7785374 MHz
NUC1      13C
P1        10.00 usec
SI        32768
SF        125.7653362 MHz
WDW       EM
SSB       0
LB        1.00 Hz
GB        0
PC        1.00

```

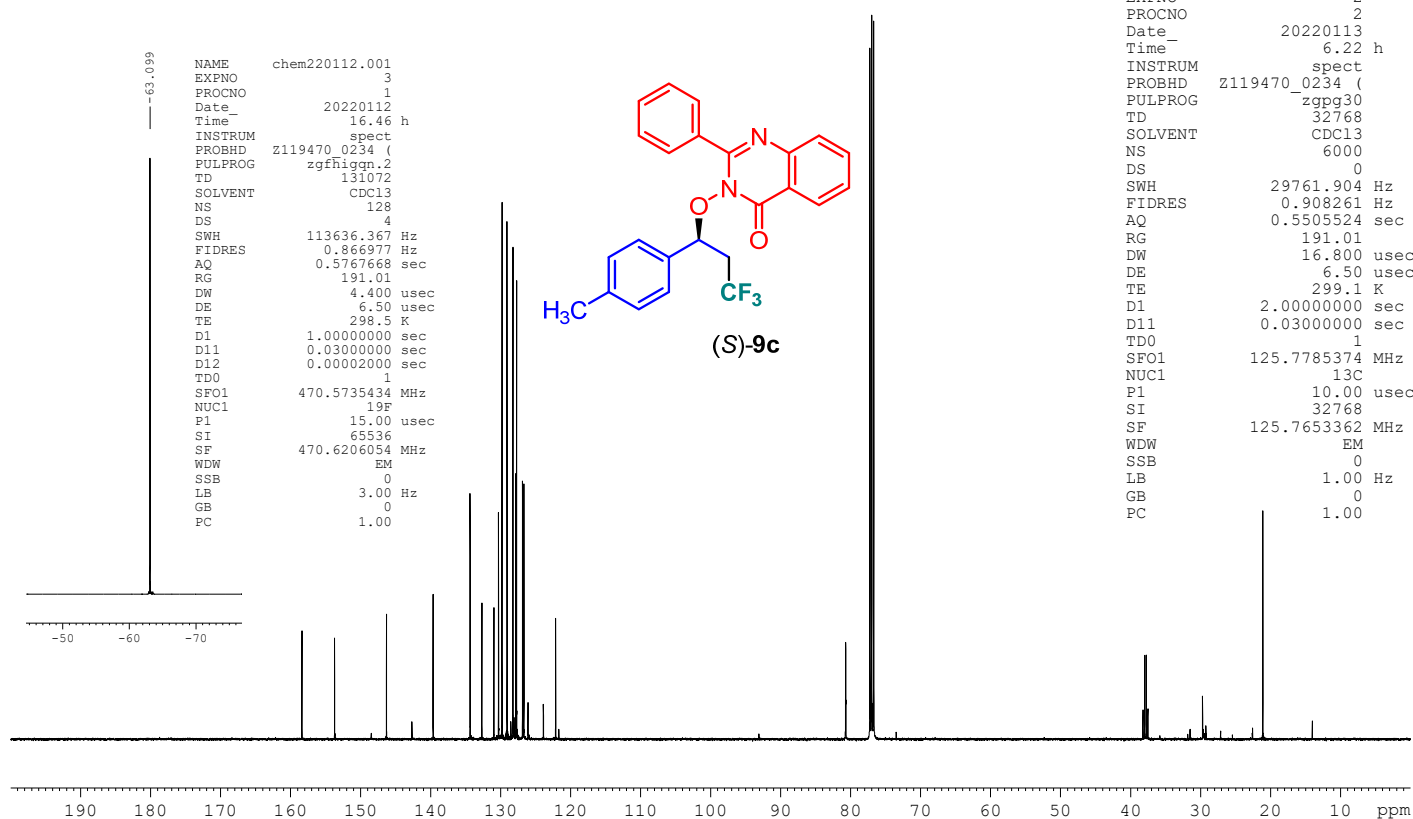

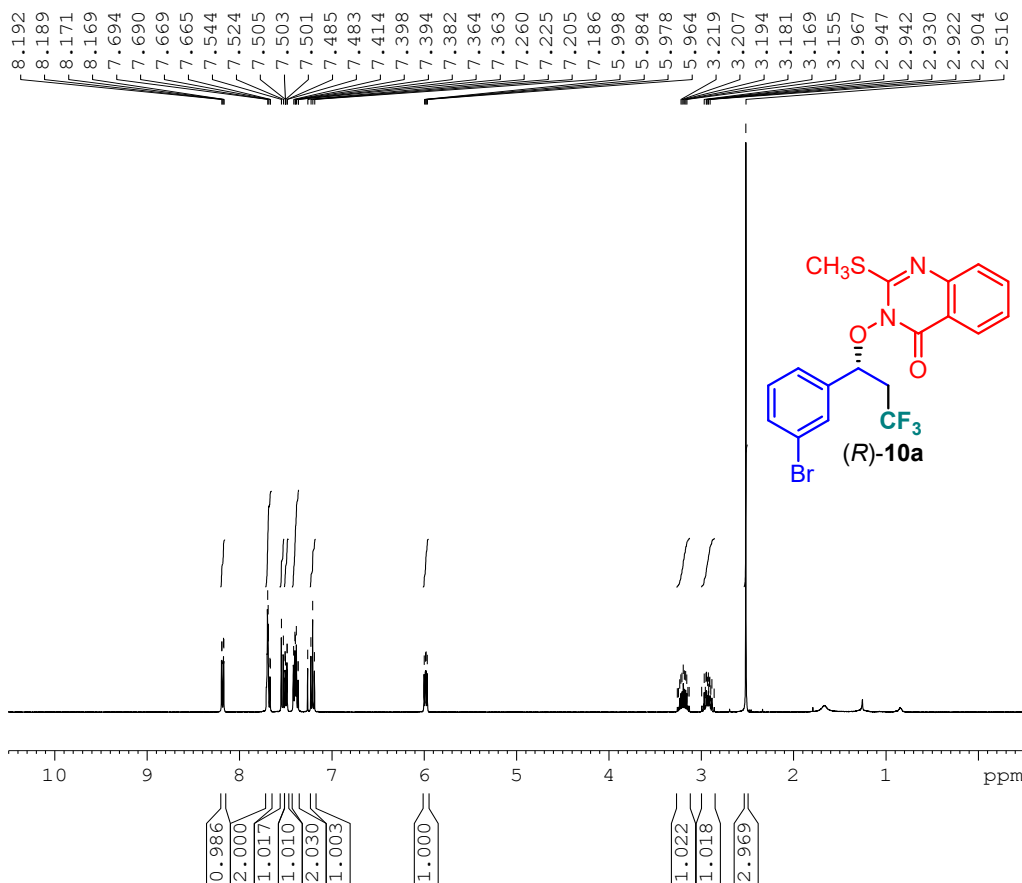

NAME CIL-1-212  
 EXPNO 3  
 PROCNO 1  
 Date\_ 20210518  
 Time\_ 20.20  
 INSTRUM spect  
 PROBHD 5 mm DUL 13C-1  
 PULPROG zg30  
 TD 32768  
 SOLVENT CDC13  
 NS 8  
 DS 0  
 SWH 6410.256 Hz  
 FIDRES 0.195625 Hz  
 AQ 2.5559540 sec  
 RG 4  
 DW 78.000 usec  
 DE 6.00 usec  
 TE 300.0 K  
 D1 2.00000000 sec  
 TD0 1

===== CHANNEL f1 =====  
 NUC1 1H  
 P1 10.00 usec  
 PL1 -2.40 dB  
 SFO1 400.1528010 MHz  
 SI 16384  
 SF 400.1500092 MHz  
 WDW EM  
 SSB 0  
 LB 0.00 Hz  
 GB 0  
 PC 1.00

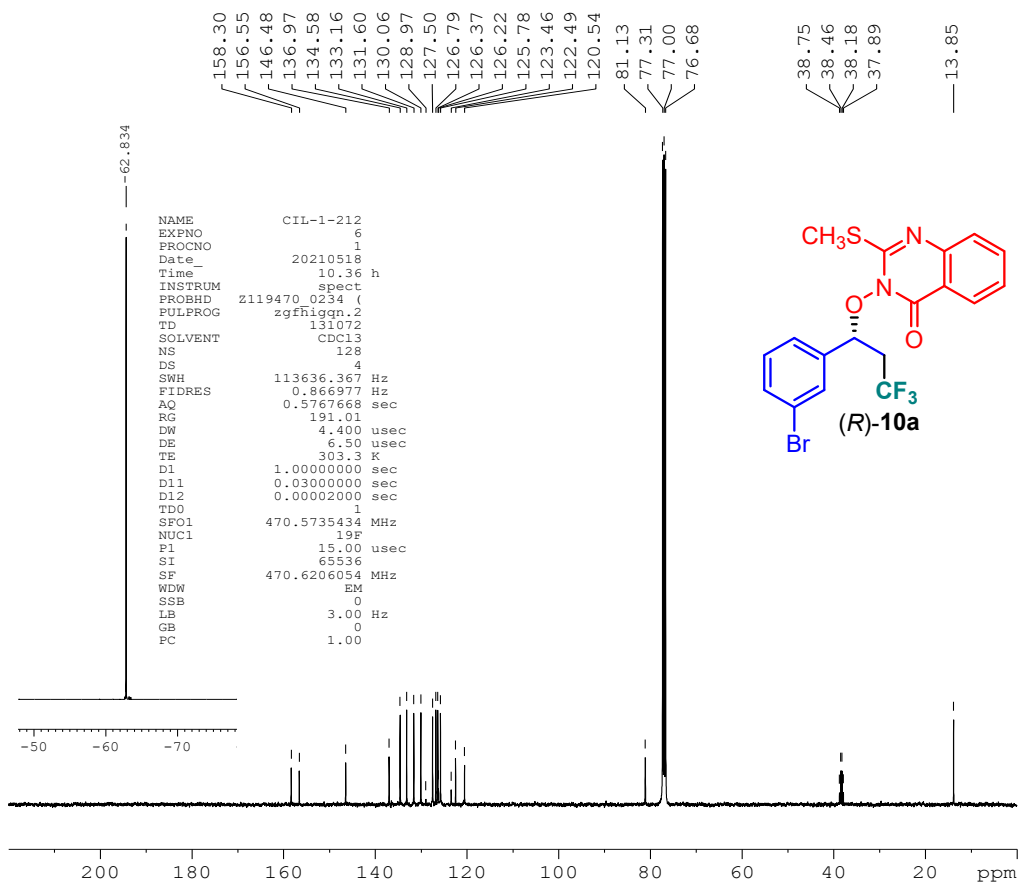

NAME CIL-1-212  
 EXPNO 6  
 PROCNO 1  
 Date\_ 20210518  
 Time\_ 10.36 h  
 INSTRUM spect  
 PROBHD Z119470 0234 (zgfhigqn.2  
 PULPROG 131072  
 TD 1  
 SOLVENT CDC13  
 NS 128  
 DS 4  
 SWH 113636.367 Hz  
 FIDRES 0.866977 Hz  
 AQ 0.5767668 sec  
 RG 191.01  
 DW 4.400 usec  
 DE 6.50 usec  
 TE 303.3 K  
 D1 1.00000000 sec  
 D11 0.03000000 sec  
 D12 0.00002000 sec  
 TD0 1  
 SFO1 470.5735434 MHz  
 NUC1 13C  
 P1 15.00 usec  
 SI 65536  
 SF 470.6206054 MHz  
 WDW EM  
 SSB 0  
 LB 3.00 Hz  
 GB 0  
 PC 1.00

NAME CIL-1-212  
 EXPNO 4  
 PROCNO 1  
 Date\_ 20210518  
 Time\_ 20.21  
 INSTRUM spect  
 PROBHD 5 mm DUL 13C-1  
 PULPROG zgpg30  
 TD 65536  
 SOLVENT CDC13  
 NS 11000  
 DS 0  
 SWH 22727.273 Hz  
 FIDRES 0.346791 Hz  
 AQ 1.4418420 sec  
 RG 57  
 DW 22.000 usec  
 DE 6.00 usec  
 TE 300.0 K  
 D1 2.00000000 sec  
 d11 0.03000000 sec  
 DELTA 1.89999998 sec  
 TD0 1

===== CHANNEL f1 =====  
 NUC1 13C  
 P1 9.70 usec  
 PL1 -0.50 dB  
 SFO1 100.6288660 MHz

===== CHANNEL f2 =====  
 CPDPRG2 waltz16  
 NUC2 1H  
 PCPD2 90.00 usec  
 PL2 -2.40 dB  
 PL12 15.10 dB  
 PL13 18.10 dB  
 SFO2 400.1516010 MHz  
 SI 32768  
 SF 100.6178006 MHz  
 WDW EM  
 SSB 0  
 LB 3.00 Hz  
 GB 0  
 PC 1.00

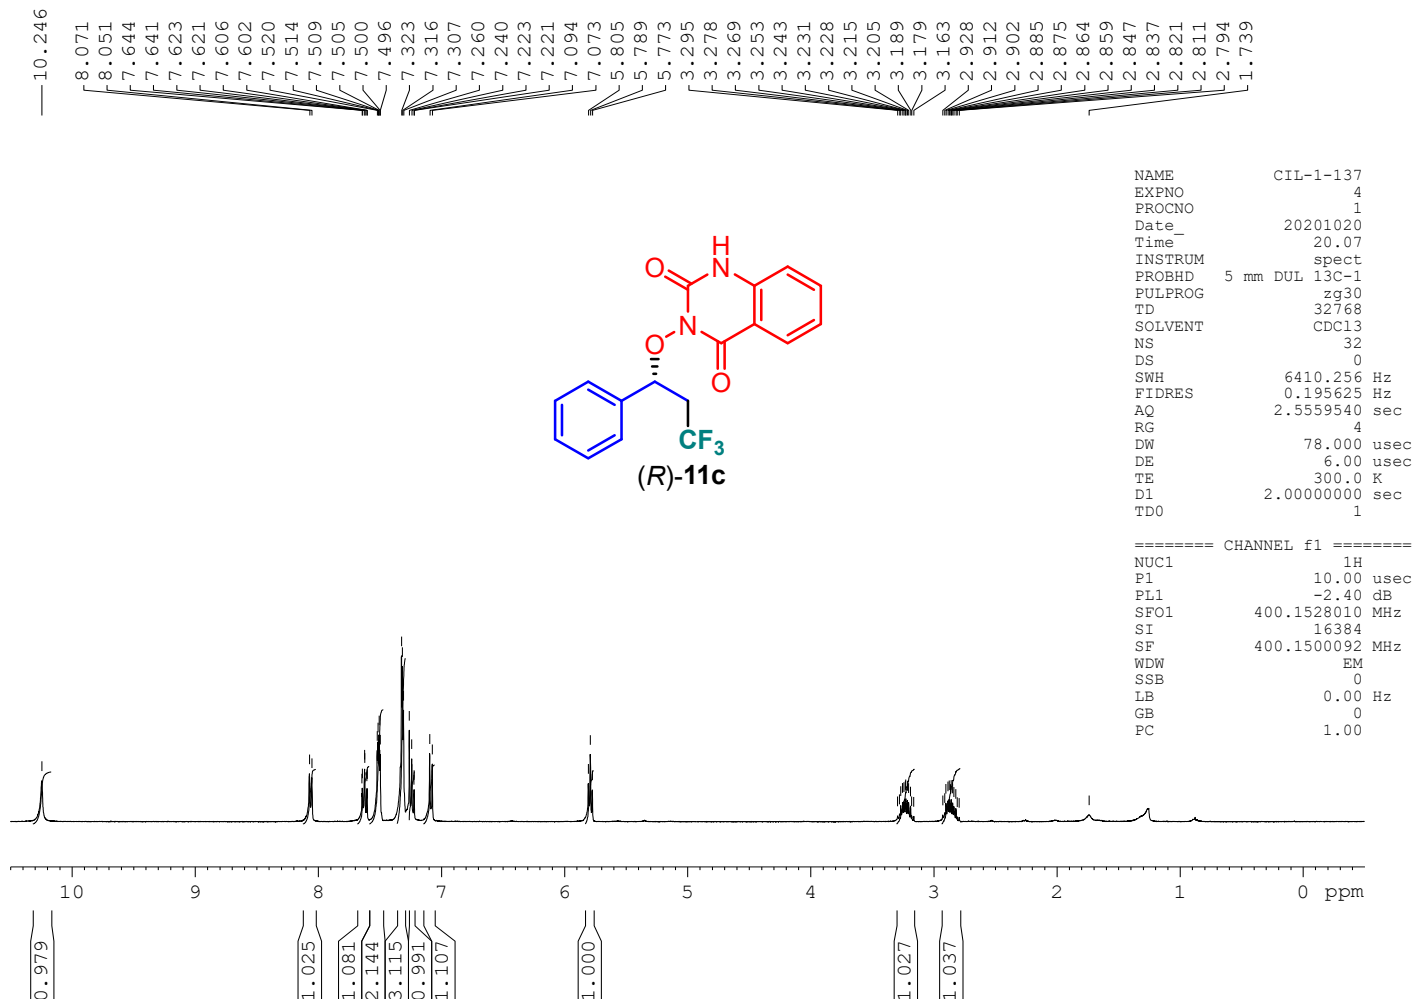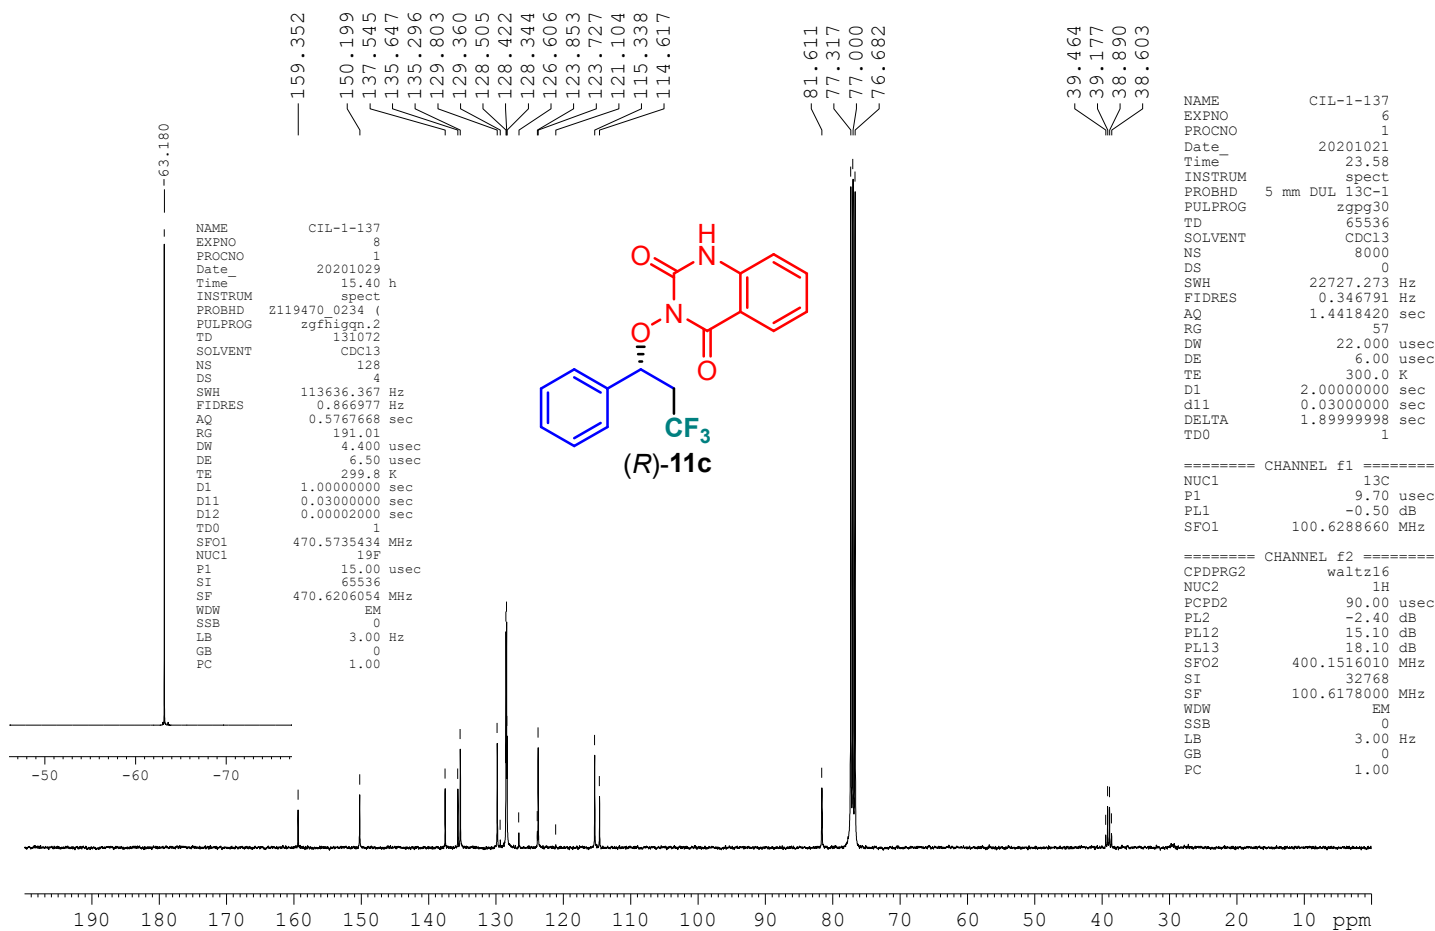

— 10.514

8.083  
8.063  
7.638  
7.635  
7.617  
7.599  
7.596  
7.325  
7.309  
7.260  
7.241  
7.221  
7.201  
7.186  
7.181  
7.137  
7.126  
7.118  
7.106  
5.770  
5.754  
5.738  
3.280  
3.264  
3.254  
3.238  
3.227  
3.216  
3.213  
3.200  
3.190  
3.174  
3.164  
3.148  
2.919  
2.902  
2.892  
2.876  
2.866  
2.854  
2.850  
2.838  
2.828  
2.812  
2.801  
2.785  
2.289

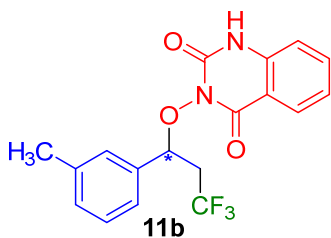

NAME CIL-1-156  
EXPNO 1  
PROCNO 1  
Date\_ 20201204  
Time\_ 19.21  
INSTRUM spect  
PROBHD 5 mm DUL 13C-1  
PULPROG zg30  
TD 32768  
SOLVENT CDC13  
NS 32  
DS 0  
SWH 6410.256 Hz  
FIDRES 0.195625 Hz  
AQ 2.5559540 sec  
RG 4  
DW 78.000 usec  
DE 6.00 usec  
TE 300.0 K  
D1 2.00000000 sec  
TD0 1

===== CHANNEL f1 =====  
NUC1 1H  
P1 10.00 usec  
PL1 -2.40 dB  
SFO1 400.1528010 MHz  
SI 16384  
SF 400.1500092 MHz  
WDW EM  
SSB 0  
LB 0.00 Hz  
GB 0  
PC 1.00

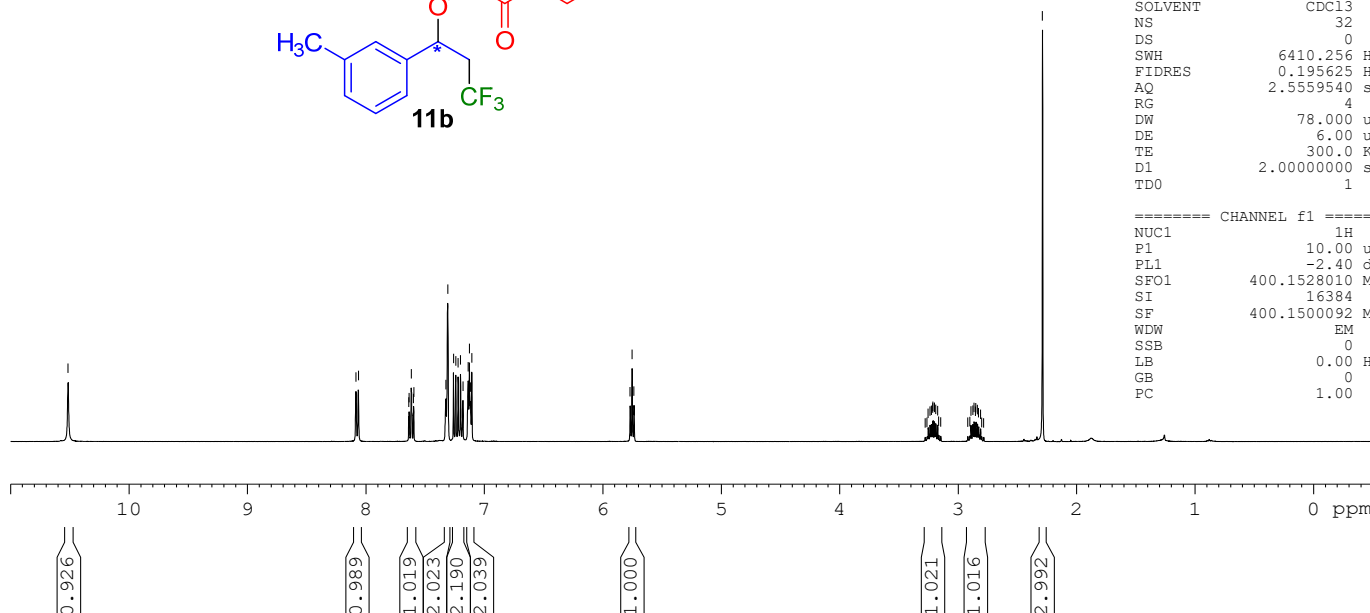

159.421  
150.442  
138.110  
137.623  
135.690  
135.258  
130.491  
129.402  
129.017  
128.288  
126.647  
125.451  
123.894  
123.691  
121.140  
115.418  
114.664  
81.740  
77.315  
76.997  
76.679  
39.524  
39.238  
38.951  
38.665  
21.261

NAME CIL-1-153  
EXPNO 7  
PROCNO 1  
Date\_ 20201129  
Time\_ 14.37 h  
INSTRUM spect  
PROBHD Z119470 0234 (zgfhigqn.2)  
PULPROG zgfhigqn.2  
TD 131072  
SOLVENT CDC13  
NS 128  
DS 4  
SWH 113636.367 Hz  
FIDRES 0.866977 Hz  
AQ 0.5767668 sec  
RG 191.01  
DW 4.400 usec  
DE 6.50 usec  
TE 299.8 K  
D1 1.00000000 sec  
D11 0.03000000 sec  
D12 0.00002000 sec  
TD0 1  
SFO1 470.5735434 MHz  
NUC1 13C  
P1 15.00 usec  
SI 65536  
SF 470.6206054 MHz  
WDW EM  
SSB 0  
LB 3.00 Hz  
GB 0  
PC 1.00

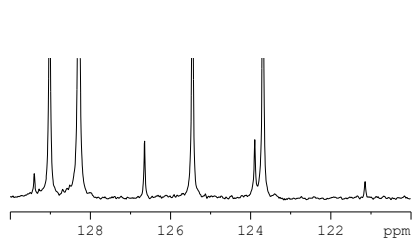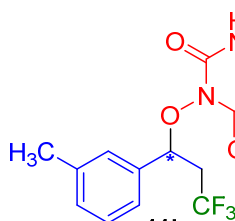

NAME CIL-1-156  
EXPNO 3  
PROCNO 1  
Date\_ 20201205  
Time\_ 23.46  
INSTRUM spect  
PROBHD 5 mm DUL 13C-1  
PULPROG zgpg30  
TD 65536  
SOLVENT CDC13  
NS 9200  
DS 0  
SWH 22727.273 Hz  
FIDRES 0.346791 Hz  
AQ 1.4418420 sec  
RG 57  
DW 22.000 usec  
DE 6.00 usec  
TE 300.0 K  
D1 2.00000000 sec  
d11 0.03000000 sec  
DELTA 1.89999999 sec  
TD0 1

===== CHANNEL f1 =====  
NUC1 13C  
P1 9.70 usec  
PL1 -0.50 dB  
SFO1 100.6288660 MHz

===== CHANNEL f2 =====  
CPDPRG2 waltz16  
NUC2 1H  
PCPD2 90.00 usec  
PL2 -2.40 dB  
PL12 15.10 dB  
PL13 18.10 dB  
SFO2 400.1516010 MHz  
SI 32768  
SF 100.6178013 MHz  
WDW EM  
SSB 0  
LB 3.00 Hz  
GB 0  
PC 1.00

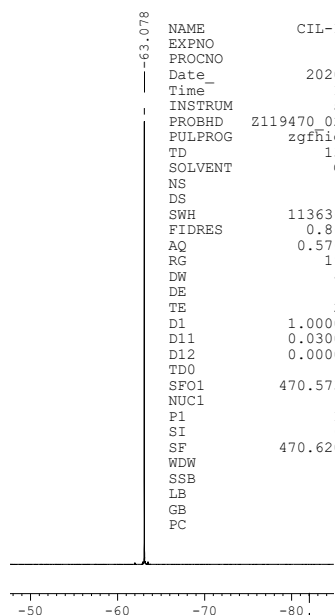

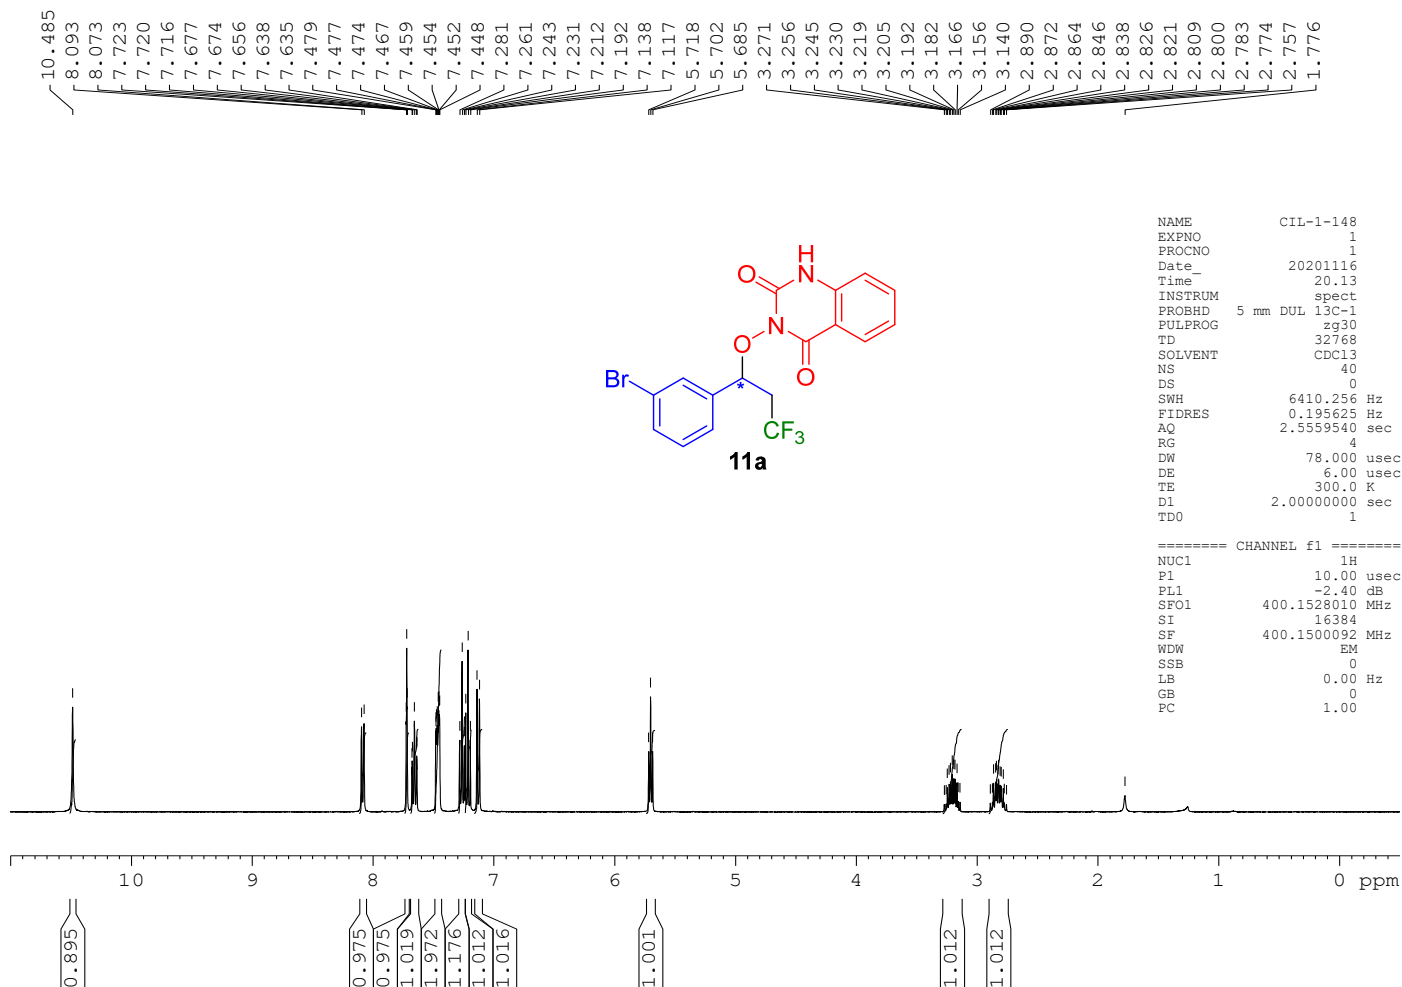

NAME CIL-1-148  
EXPNO 1  
PROCNO 1  
Date\_ 20201116  
Time\_ 20.13  
INSTRUM spect  
PROBHD 5 mm DUL 13C-1  
PULPROG zg30  
TD 32768  
SOLVENT CDCl<sub>3</sub>  
NS 40  
DS 0  
SWH 6410.256 Hz  
FIDRES 0.195625 Hz  
AQ 2.5559540 sec  
RG 4  
DW 78.000 usec  
DE 6.00 usec  
TE 300.0 K  
D1 2.00000000 sec  
TD0 1

===== CHANNEL f1 =====  
NUC1 1H  
P1 10.00 usec  
PL1 -2.40 dB  
SFO1 400.1528010 MHz  
SI 16384  
SF 400.1500092 MHz  
WDW EM  
SSB 0  
LB 0.00 Hz  
GB 0  
PC 1.00

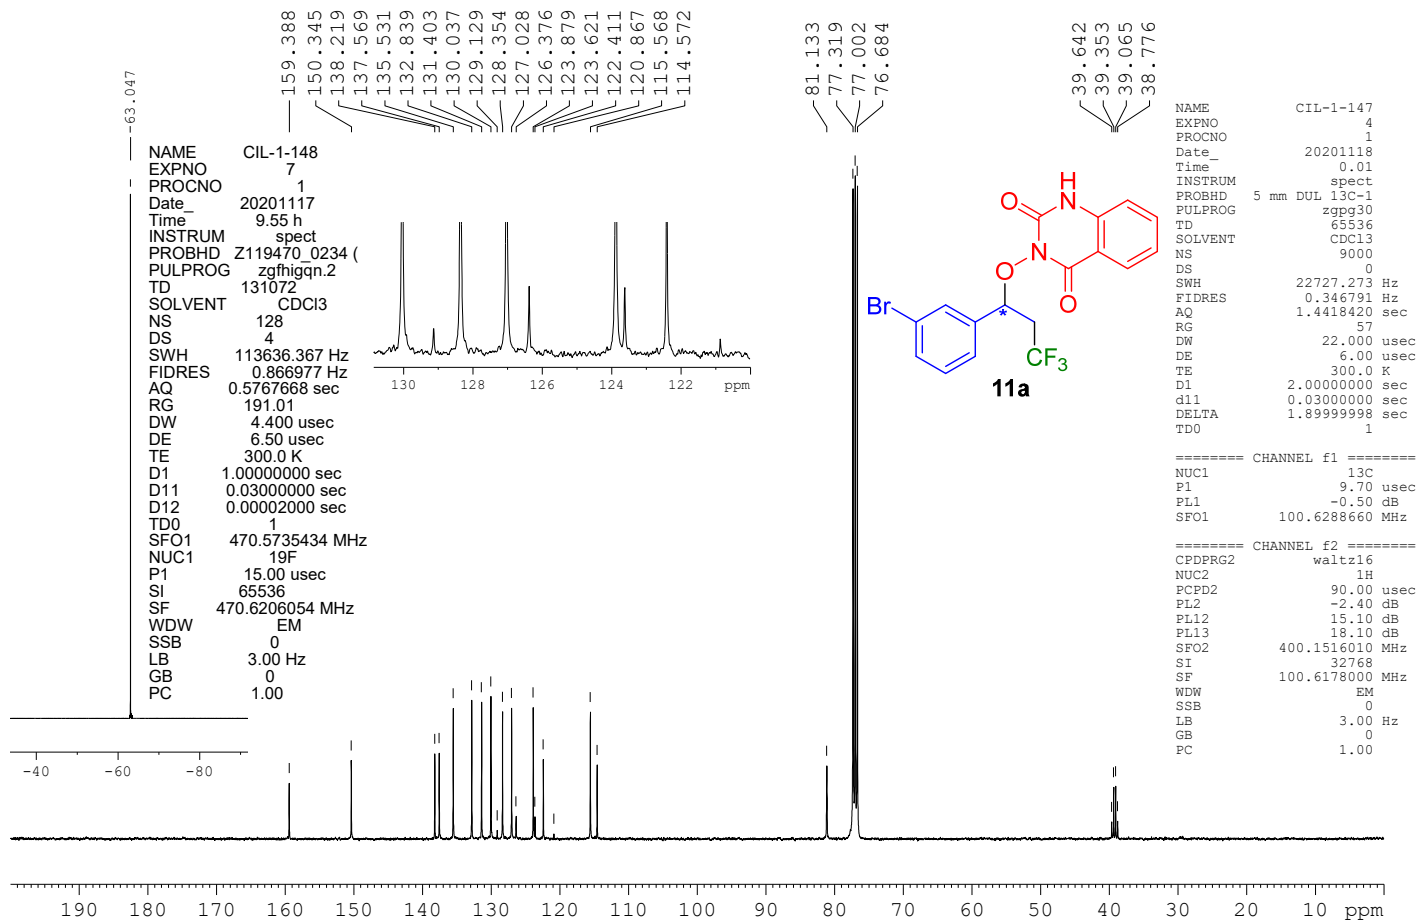

NAME CIL-1-147  
EXPNO 4  
PROCNO 1  
Date\_ 20201118  
Time\_ 0.01  
INSTRUM spect  
PROBHD 5 mm DUL 13C-1  
PULPROG zgpg30  
TD 65536  
SOLVENT CDCl<sub>3</sub>  
NS 9000  
DS 0  
SWH 22727.273 Hz  
FIDRES 0.346791 Hz  
AQ 1.4418420 sec  
RG 57  
DW 22.000 usec  
DE 6.00 usec  
TE 300.0 K  
D1 2.00000000 sec  
d11 0.03000000 sec  
DELTA 1.899999998 sec  
TD0 1

===== CHANNEL f1 =====  
NUC1 13C  
P1 9.70 usec  
PL1 -0.50 dB  
SFO1 100.6288660 MHz

===== CHANNEL f2 =====  
CPDPRG2 waltz16  
NUC2 1H  
PCPD2 90.00 usec  
PL2 -2.40 dB  
PL12 15.10 dB  
PL13 18.10 dB  
SFO2 400.1516010 MHz  
SI 32768  
SF 100.6178000 MHz  
WDW EM  
SSB 0  
LB 3.00 Hz  
GB 0  
PC 1.00



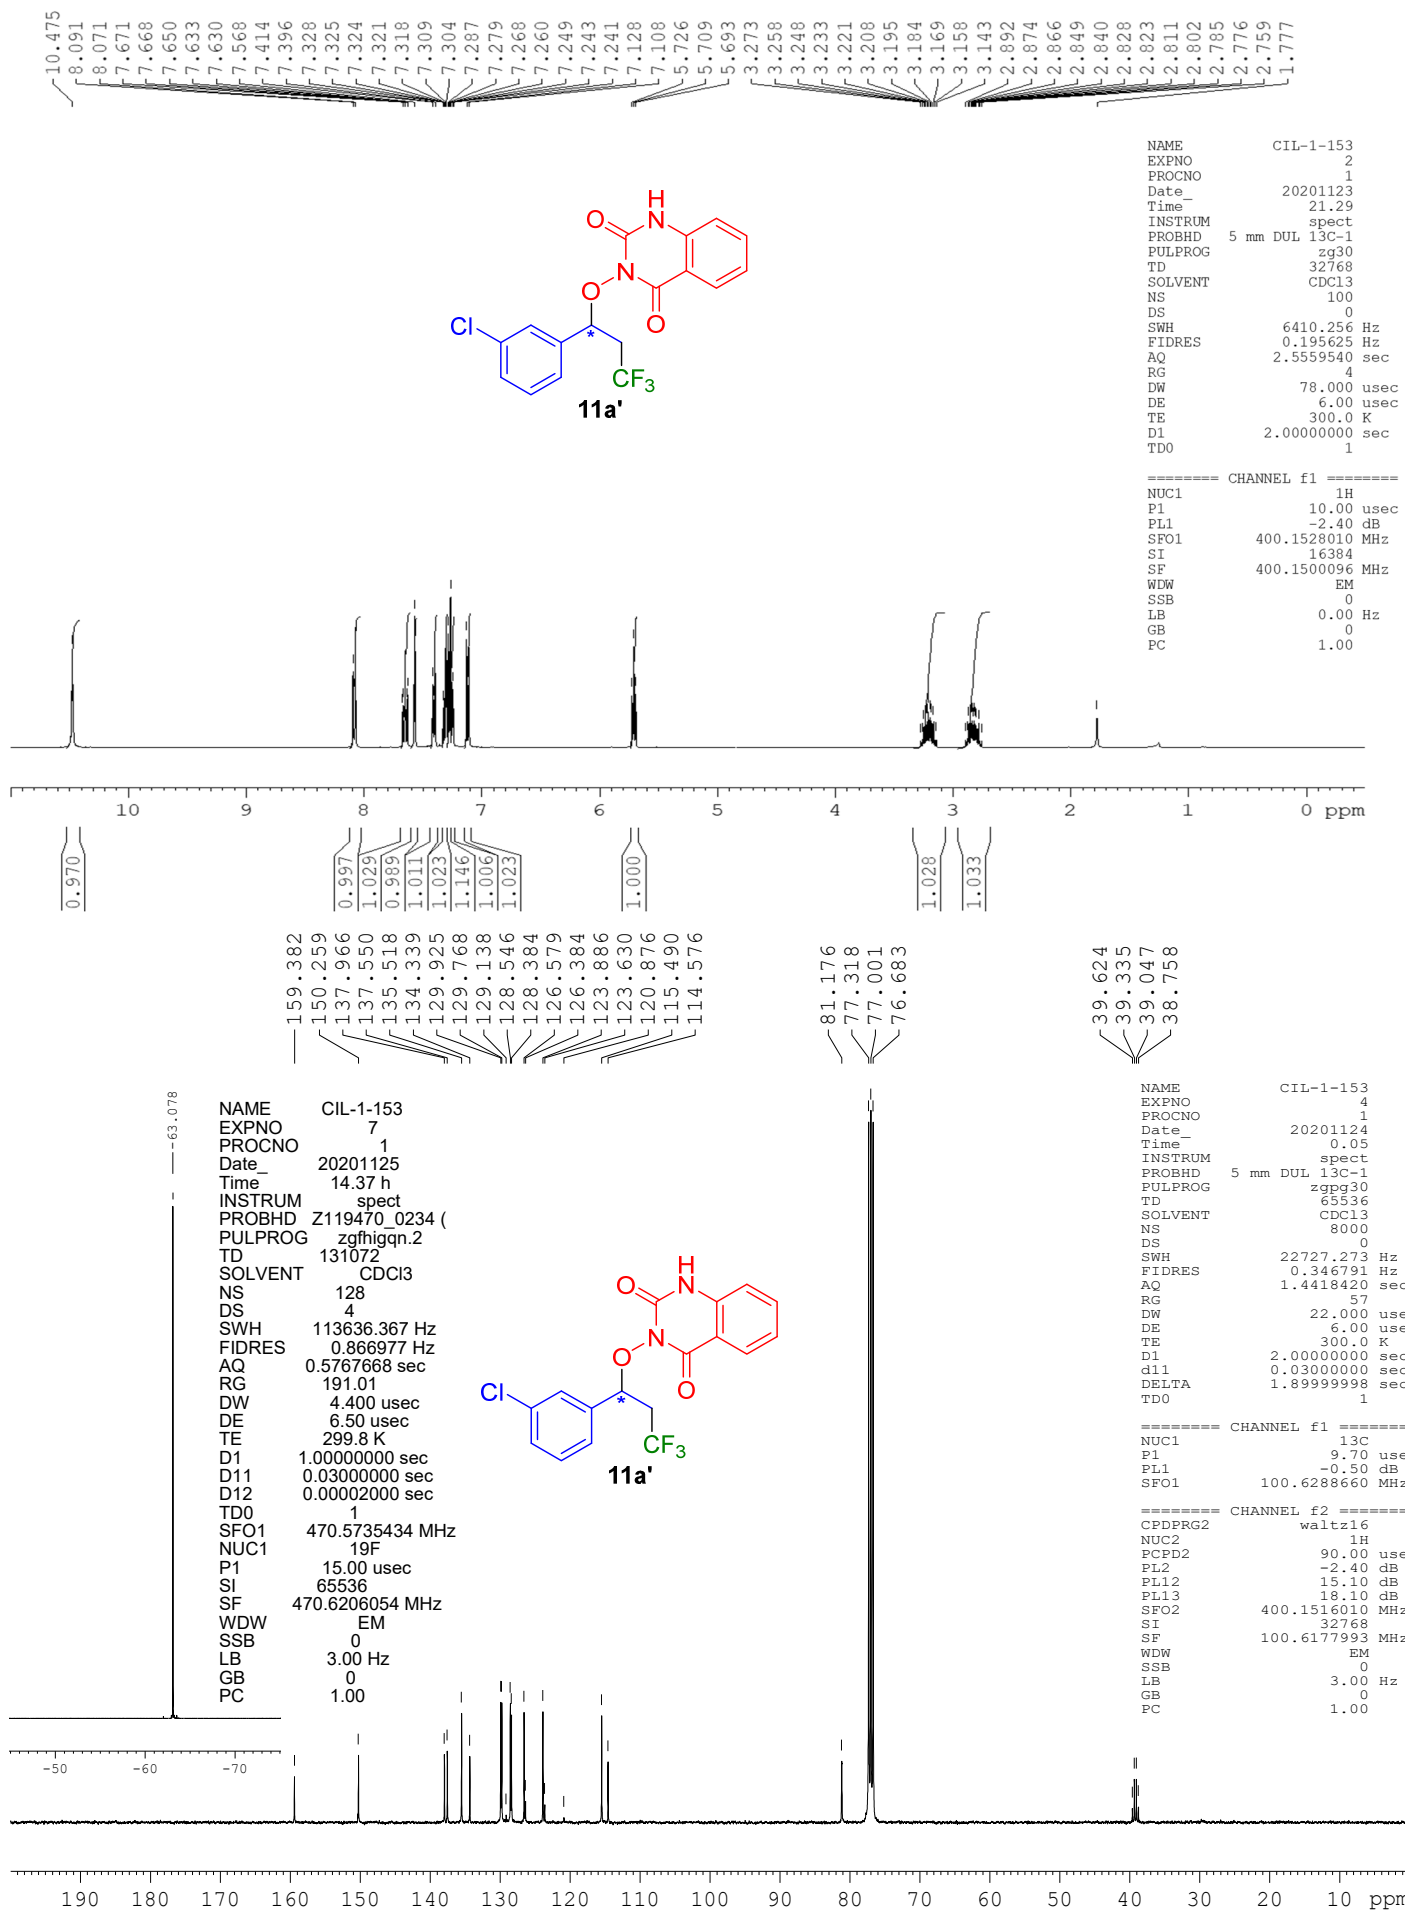

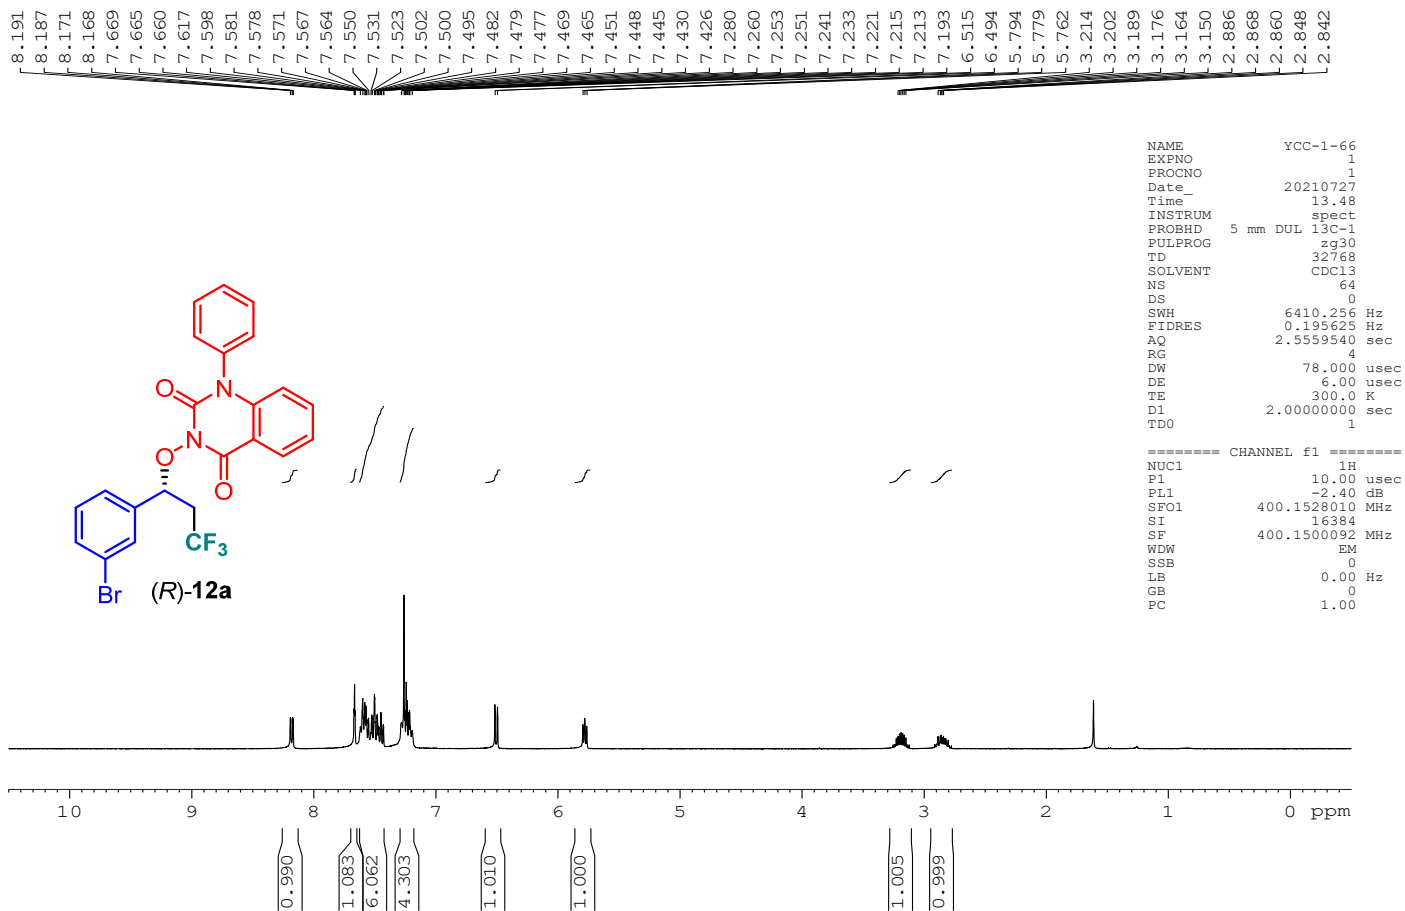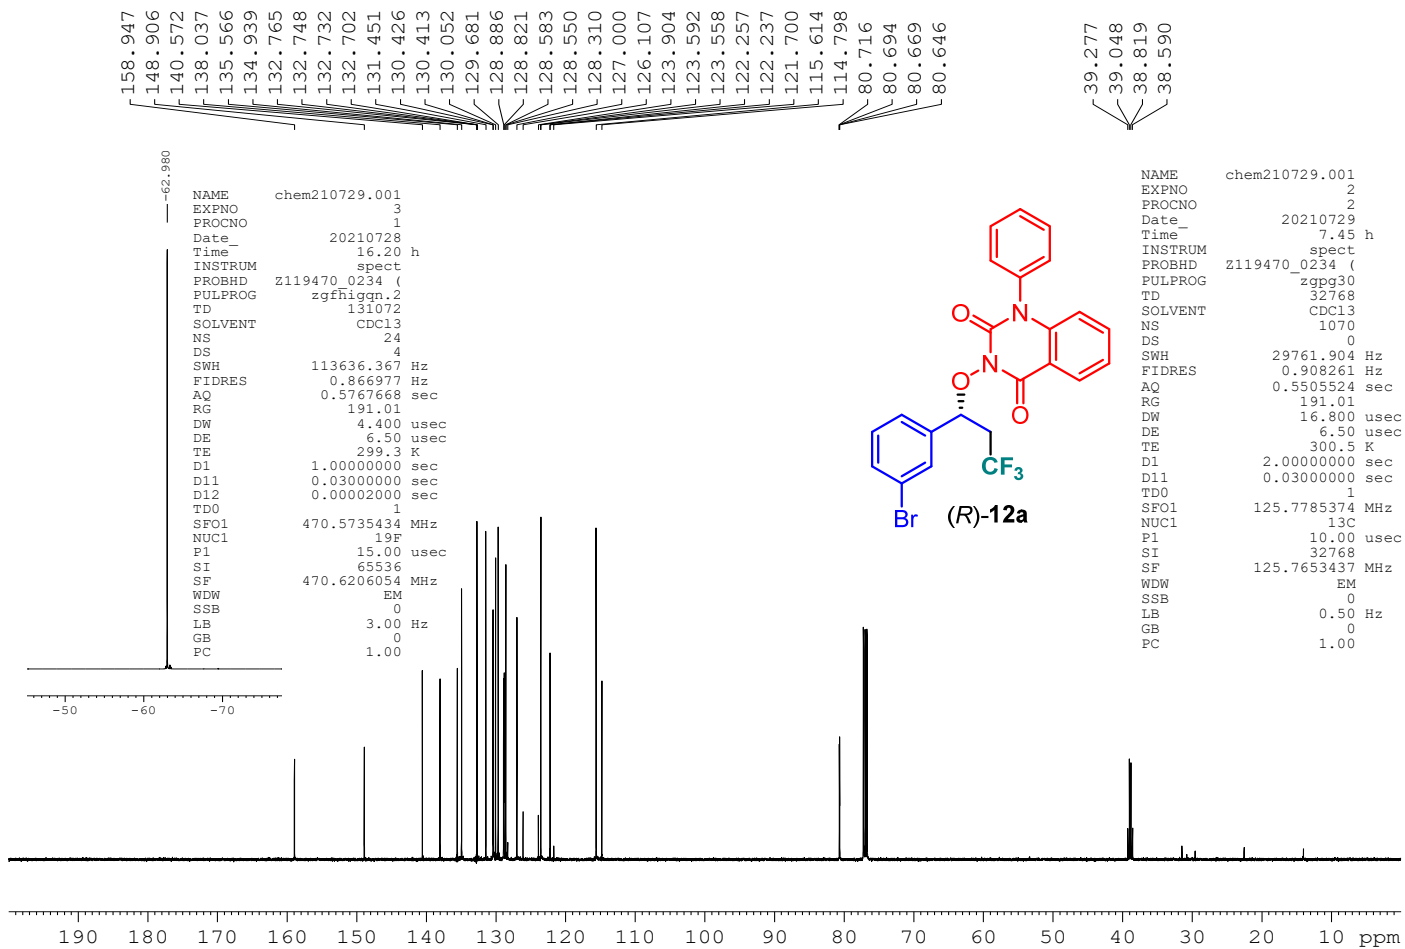

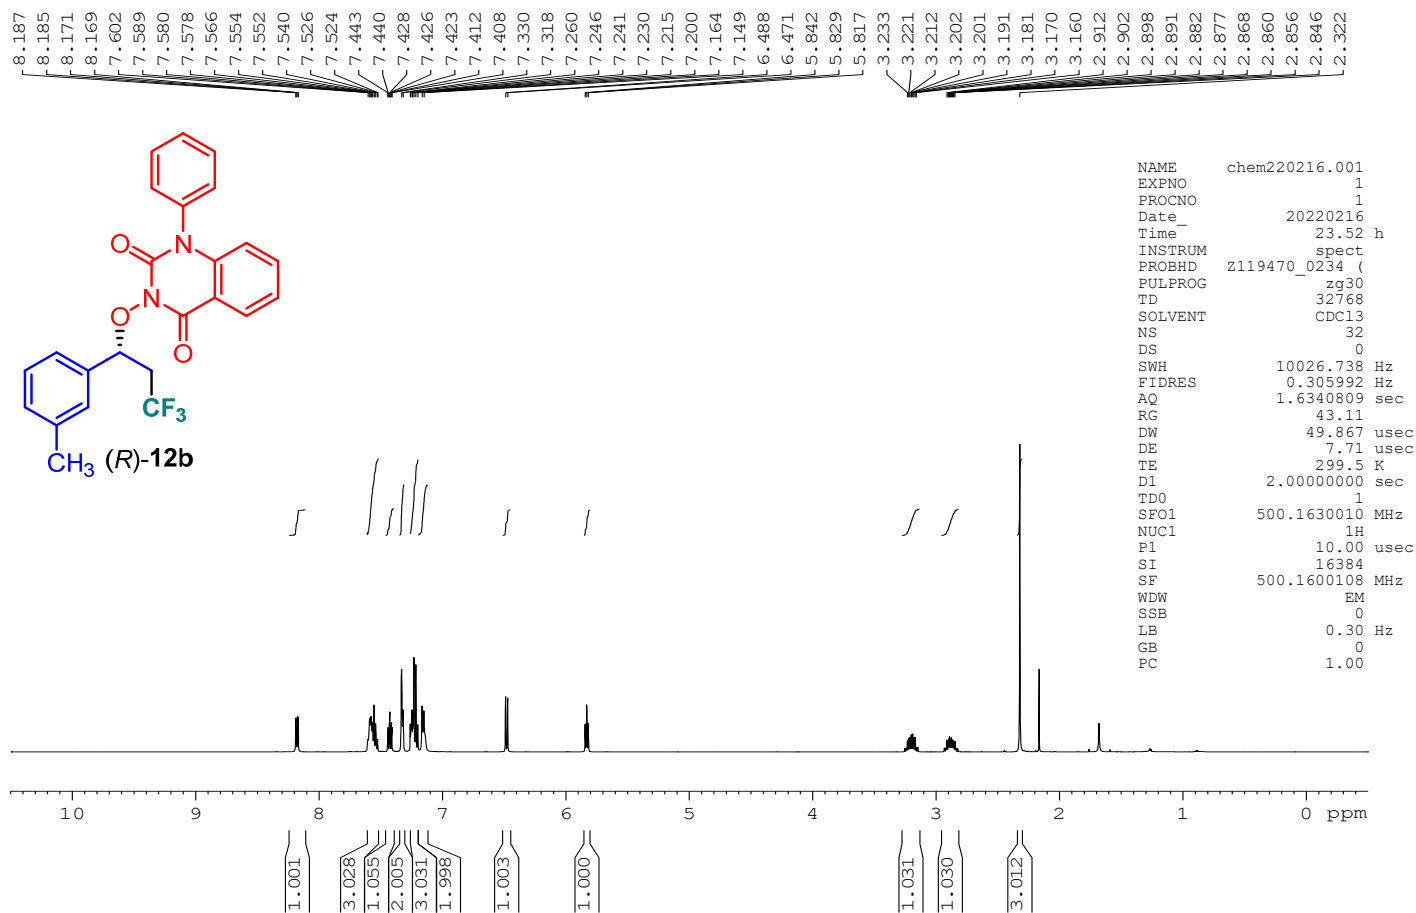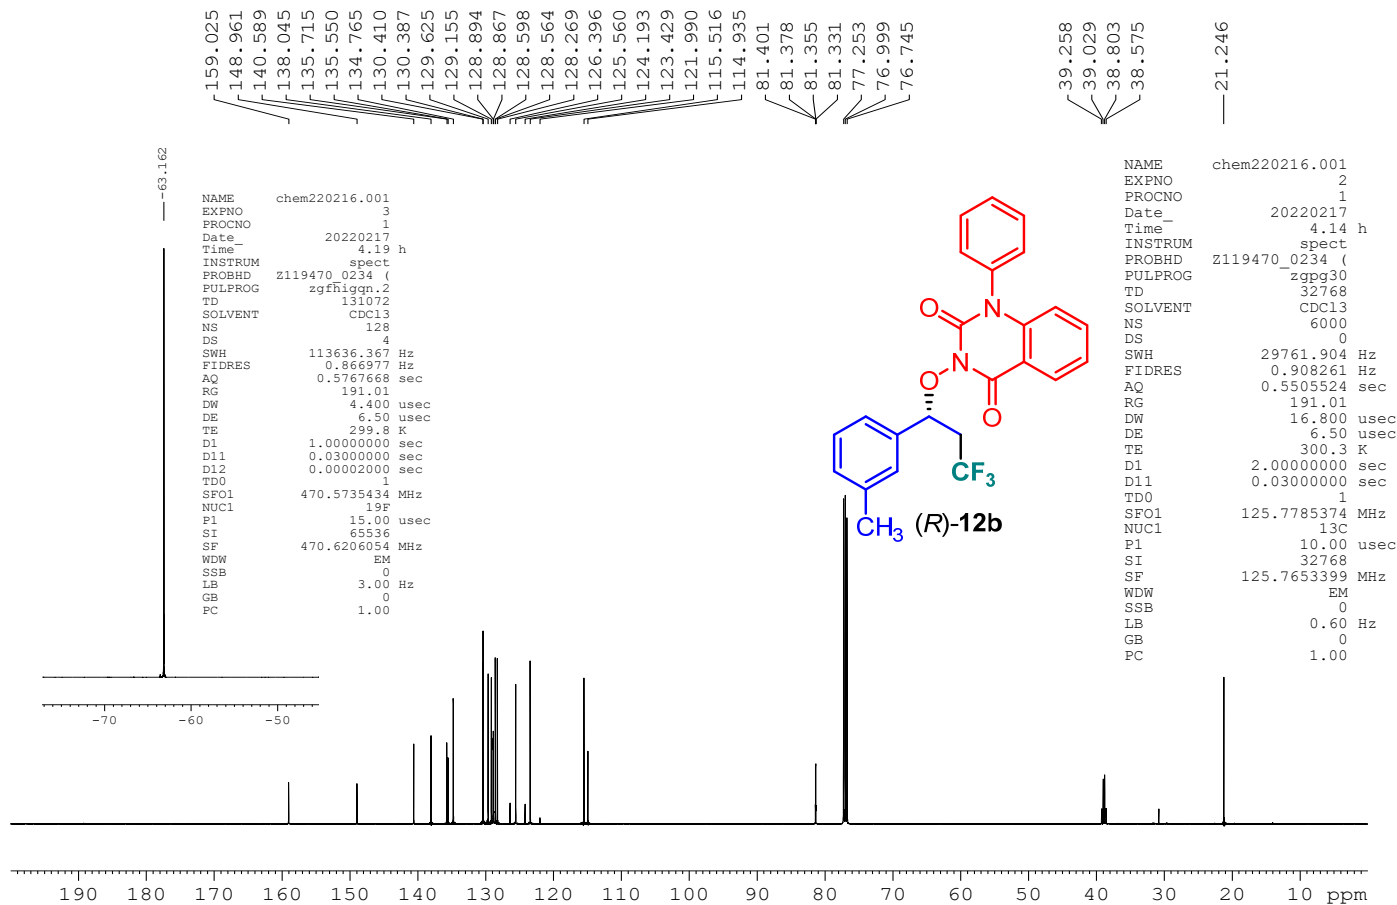

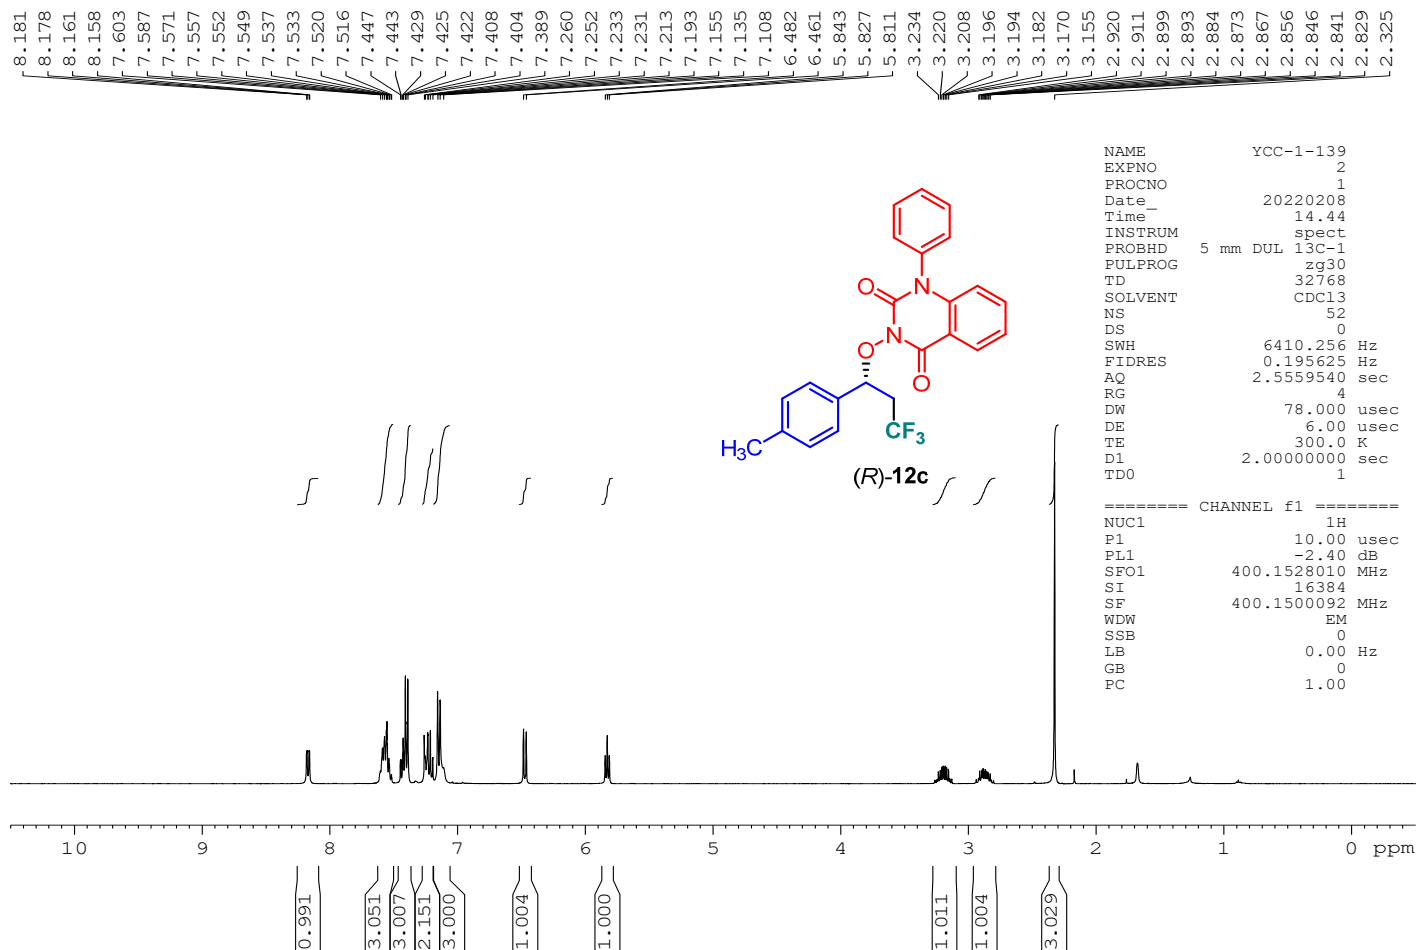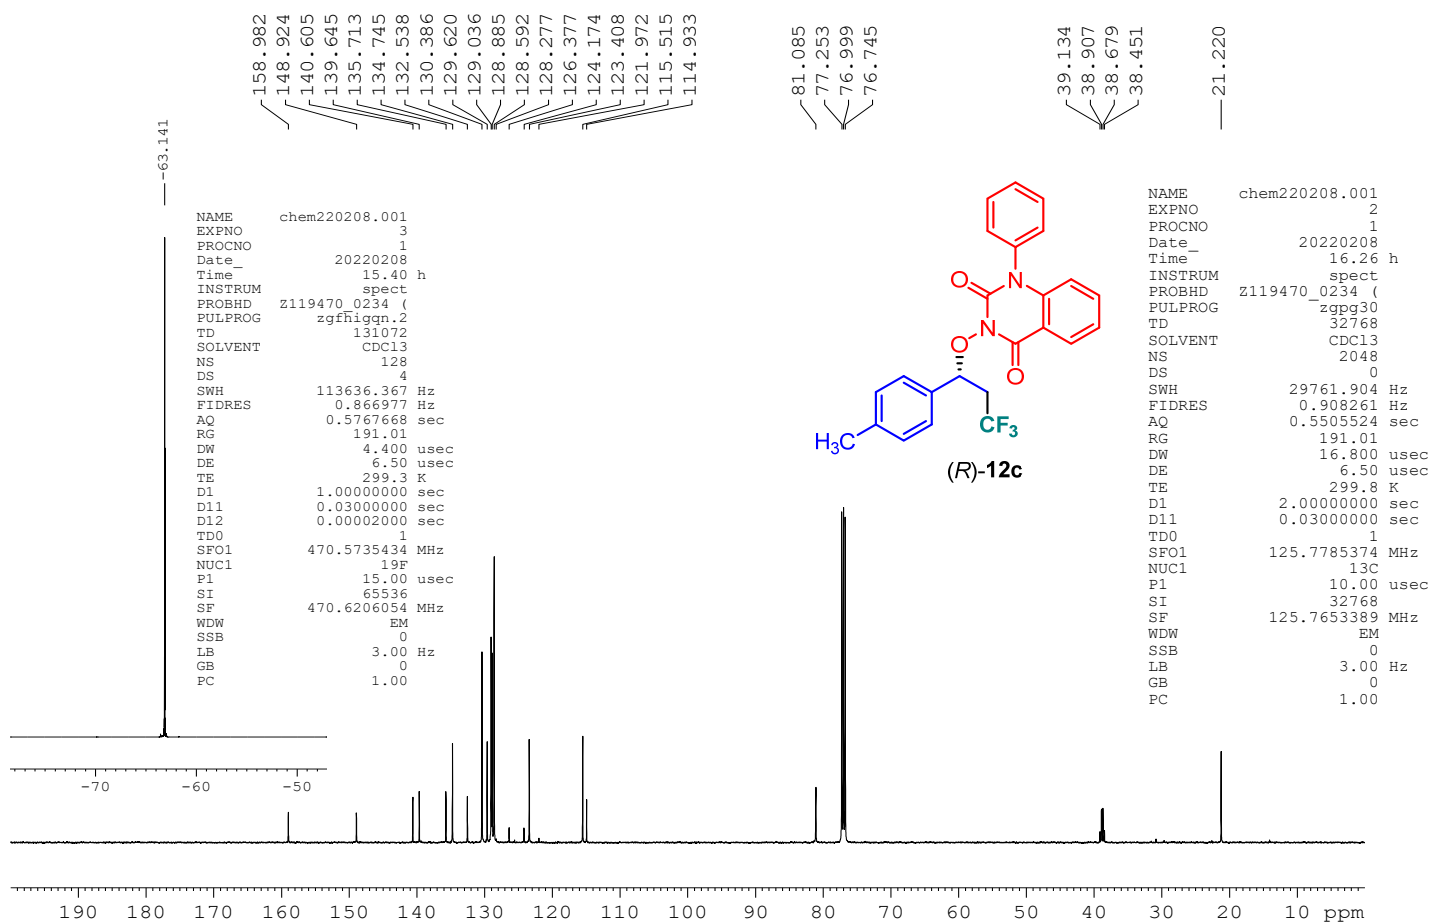



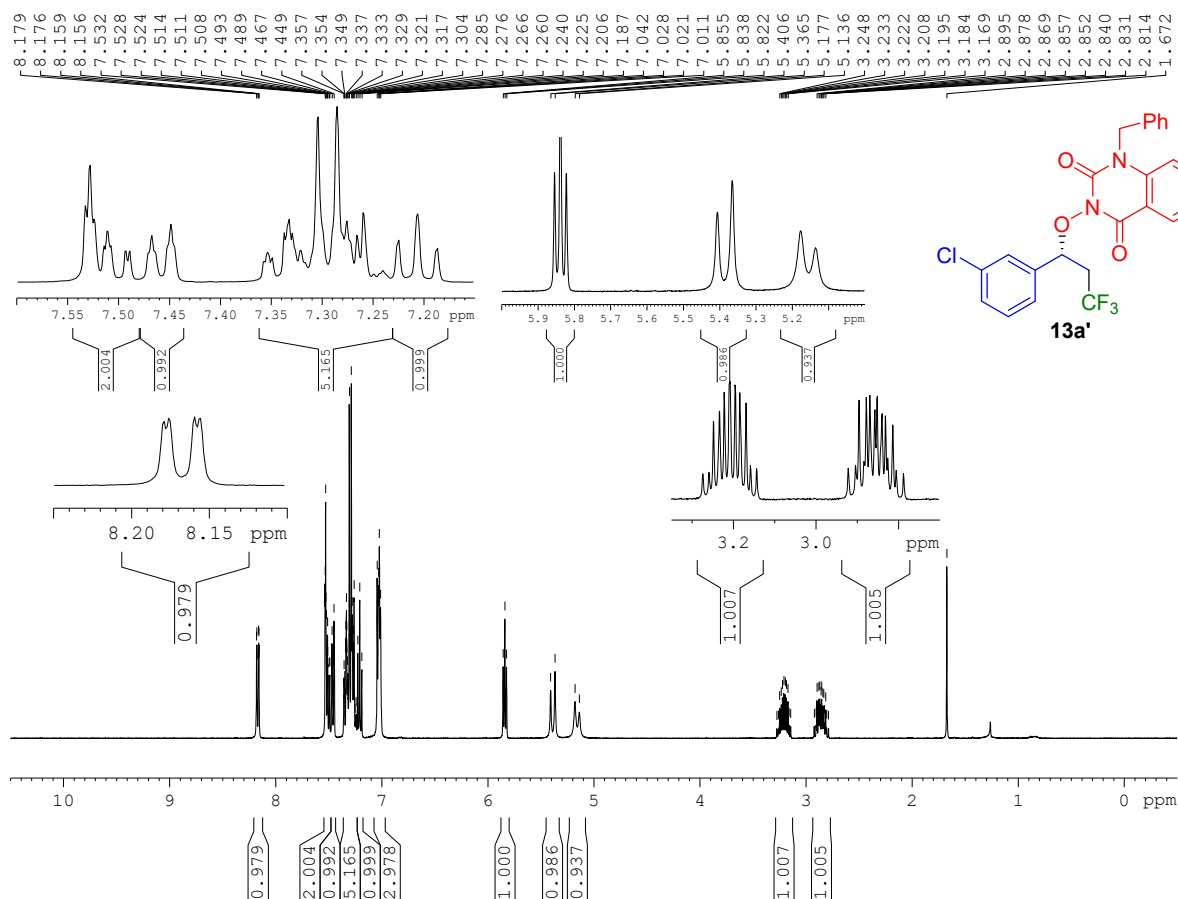

NAME CIL-1-214  
EXPNO 3  
PROCNO 1  
Date 20210523  
Time 18.17  
INSTRUM spect  
PROBHD 5 mm DUL 13C-1  
PULPROG zg30  
TD 32768  
SOLVENT CDCl3  
NS 24  
DS 0  
SWH 6410.256 Hz  
FIDRES 0.195625 Hz  
AQ 2.5559540 sec  
RG 4  
DW 78.000 usec  
DE 6.00 usec  
TE 300.0 K  
D1 2.00000000 sec  
TDO 1

===== CHANNEL f1 =====  
NUC1 1H  
P1 10.00 usec  
PL1 -2.40 dB  
SFO1 400.1528010 MHz  
SI 16384  
SF 400.1500092 MHz  
WDW EM  
SSB 0  
LB 0.00 Hz  
GB 0  
PC 1.00

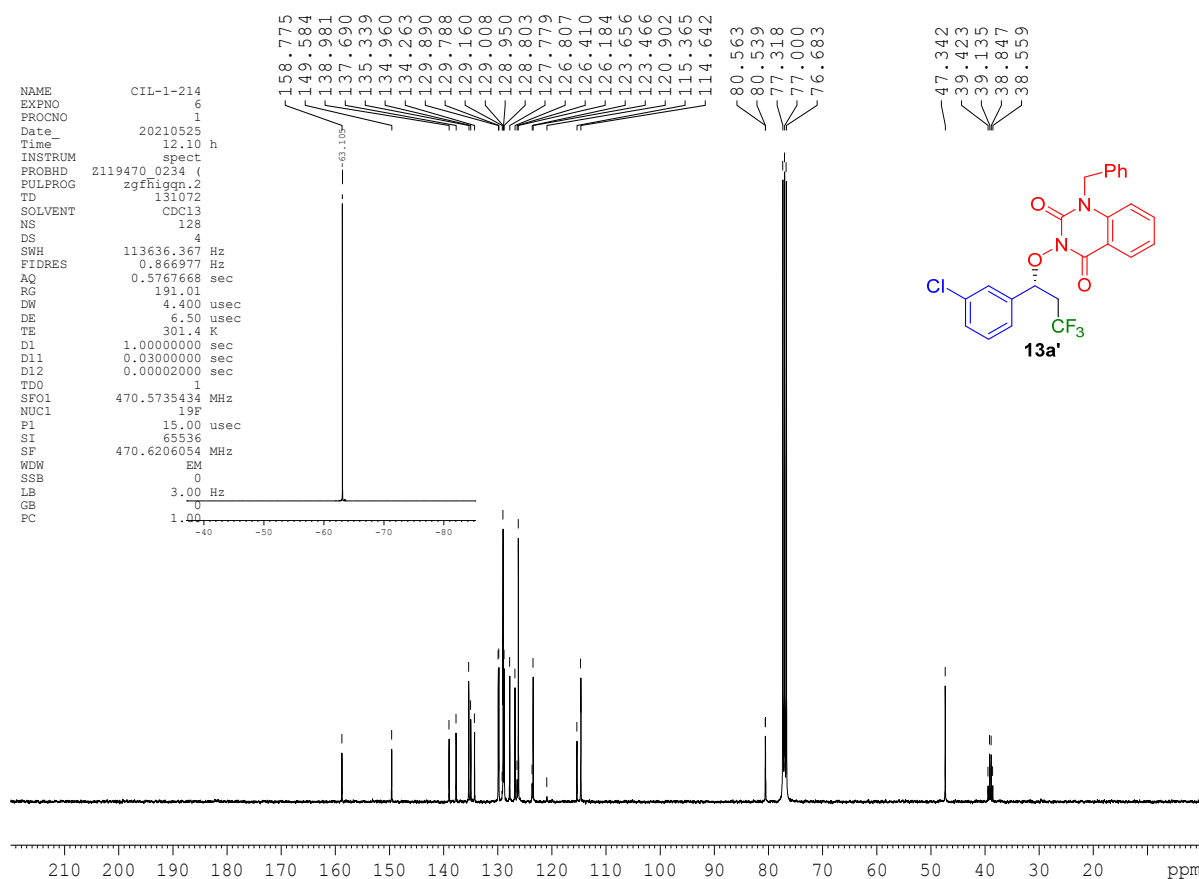

NAME CIL-1-214  
EXPNO 4  
PROCNO 1  
Date 20210523  
Time 18.19  
INSTRUM spect  
PROBHD 5 mm DUL 13C-1  
PULPROG zgpg30  
TD 65536  
SOLVENT CDCl3  
NS 2200  
DS 0  
SWH 22727.273 Hz  
FIDRES 0.346791 Hz  
AQ 1.4418420 sec  
RG 57  
DW 22.000 usec  
DE 6.00 usec  
TE 300.0 K  
D1 2.00000000 sec  
d11 0.03000000 sec  
DELTA 1.89999998 sec  
TDO 1

===== CHANNEL f1 =====  
NUC1 13C  
P1 9.70 usec  
PL1 -0.50 dB  
SFO1 100.6288660 MHz

===== CHANNEL f2 =====  
CPDPRG2 waltz16  
NUC2 1H  
PCPD2 90.00 usec  
PL2 -2.40 dB  
PL12 15.10 dB  
PL13 18.10 dB  
SFO2 400.1516010 MHz  
SI 32768  
SF 100.6178020 MHz  
WDW EM  
SSB 0  
LB 3.00 Hz  
GB 0  
PC 1.00

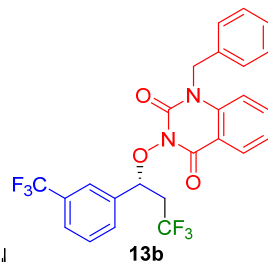

```

NAME          CIL-1-216
EXPNO         2
PROCNO        1
Date_         20210524
Time_         12.34
INSTRUM       spect
PROBHD        5 mm DUL D13C-1
PULPROG       zg30
TD            32768
SOLVENT       CDCl3
NS            32
DS            0
SWH           6410.256 Hz
FIDRES        0.195625 Hz
AQ            2.5559540 sec
RG            4
DW            78.0000 usec
DE            6.00 usec
TE            300.0 K
D1            2.0000000 sec
TD0           1

===== CHANNEL f1 =====
NUC1          1H
P1            10.00 usec
PL1           -2.40 dB
SFO1          400.1528010 MHz
SF            16384
SF2           400.1500092 MHz
WDW           EM
SSB           0
LB            0.00 Hz
GB            0
FC            1.00

```

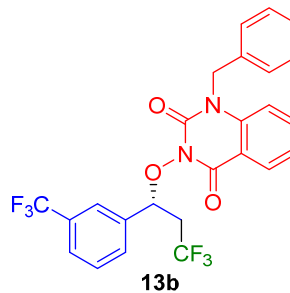

```

NAME                CIL-1-216
EXPNO                2
PROCNO              1
Date_               20210524
Time_               17.45
INSTRUM             spect
PROBHD              5 mm DUL 13C-1
PULPROG             zgpg30
TD                  65536
SOLVENT             CDCl3
NS                  2900
DS                   0
SWH                 22727.273 Hz
FIDRES              0.346791 Hz
AQ                  1.4418420 sec
RG                   57
DC                   6.00 usec
DE                   300.0 K
TE                  2.000000000 sec
d11                  0.03000000 sec
DELTA                1.89999998 sec
TDO                  1
===== CHANNEL f1 =====
NUC1                  13C
P1                    9.70 usec
PL1                   -0.50 dB
SFO1                 100.6288660 MHz
===== CHANNEL f2 =====
CPDPRG2              waltz16
NUC2                  1H
F2                    90.00 usec
PL2                   -2.40 dB
PL12                 15.10 dB
PL13                 18.10 dB
SFO2                 400.1516010 MHz
SF2                  32768
SF                    100.6178013 MHz
WDW                   EM
SSB                   0
LB                   3.00 Hz
GB                   0
PC                    1.00

```

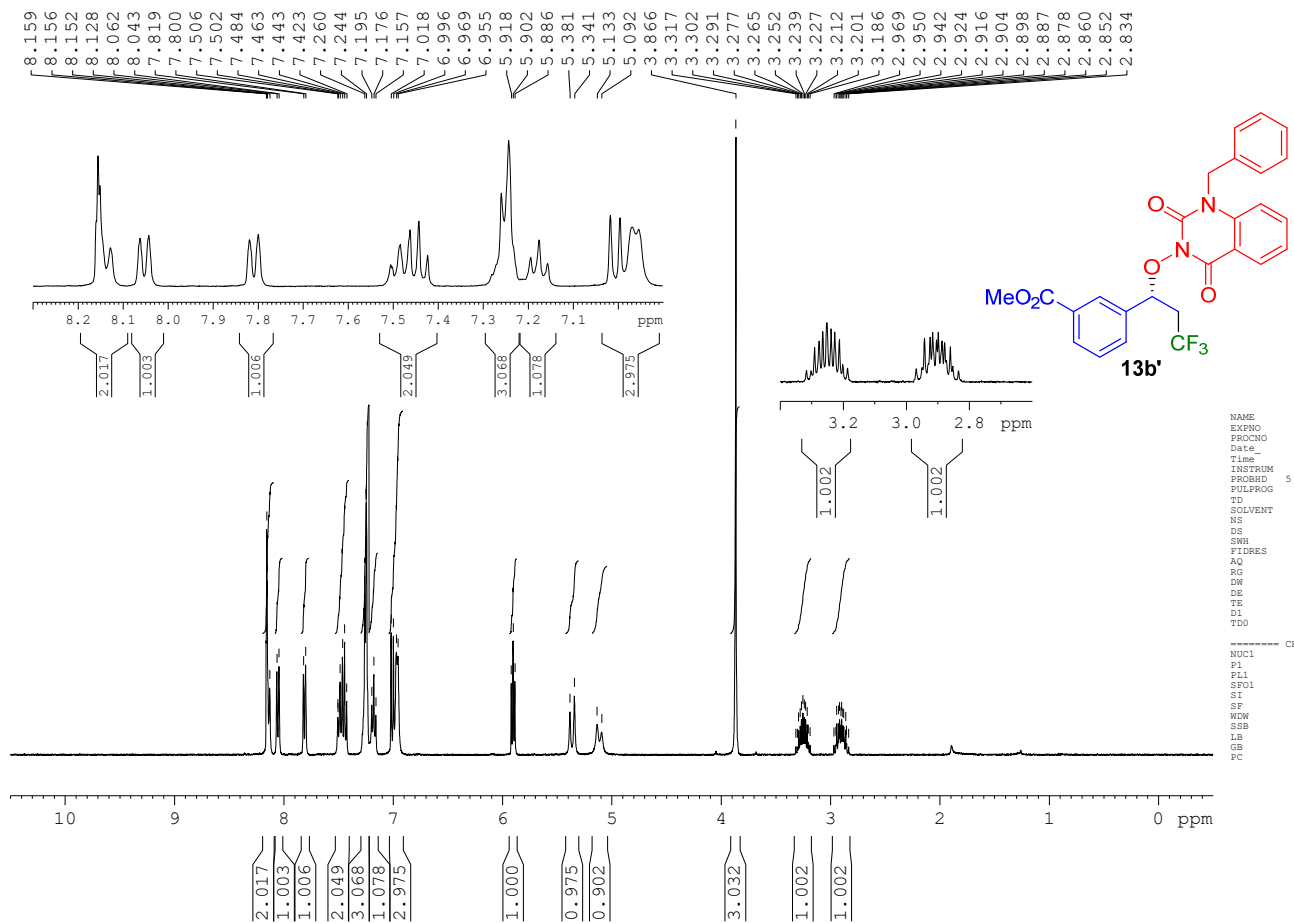

```

NAME      3-acetyloxy
EXPNO     2
PROCNO    1
Date_     20210630
Time      17.20
INSTRUM   spect
PROBHD    5 mm DUL 13C-1
PULPROG   zg30
TD         32768
SOLVENT   CDCl3
NS         8
DS         0
SWH        6410.256 Hz
FIDRES     0.195625 Hz
AQ         2.5559540 sec
RG         4
DW         78.000 usec
DE         6.00 usec
TE         300.0 K
D1         2.00000000 sec
TDO        1
----- CHANNEL f1 -----
NUC1       1H
P1         10.00 usec
PL1        -2.40 dB
SFO1       400.1528010 MHz
SI         16384
SF         400.1500088 MHz
WDW        EM
SSB         0
LB         0.00 Hz
GB         0
PC         1.00

```

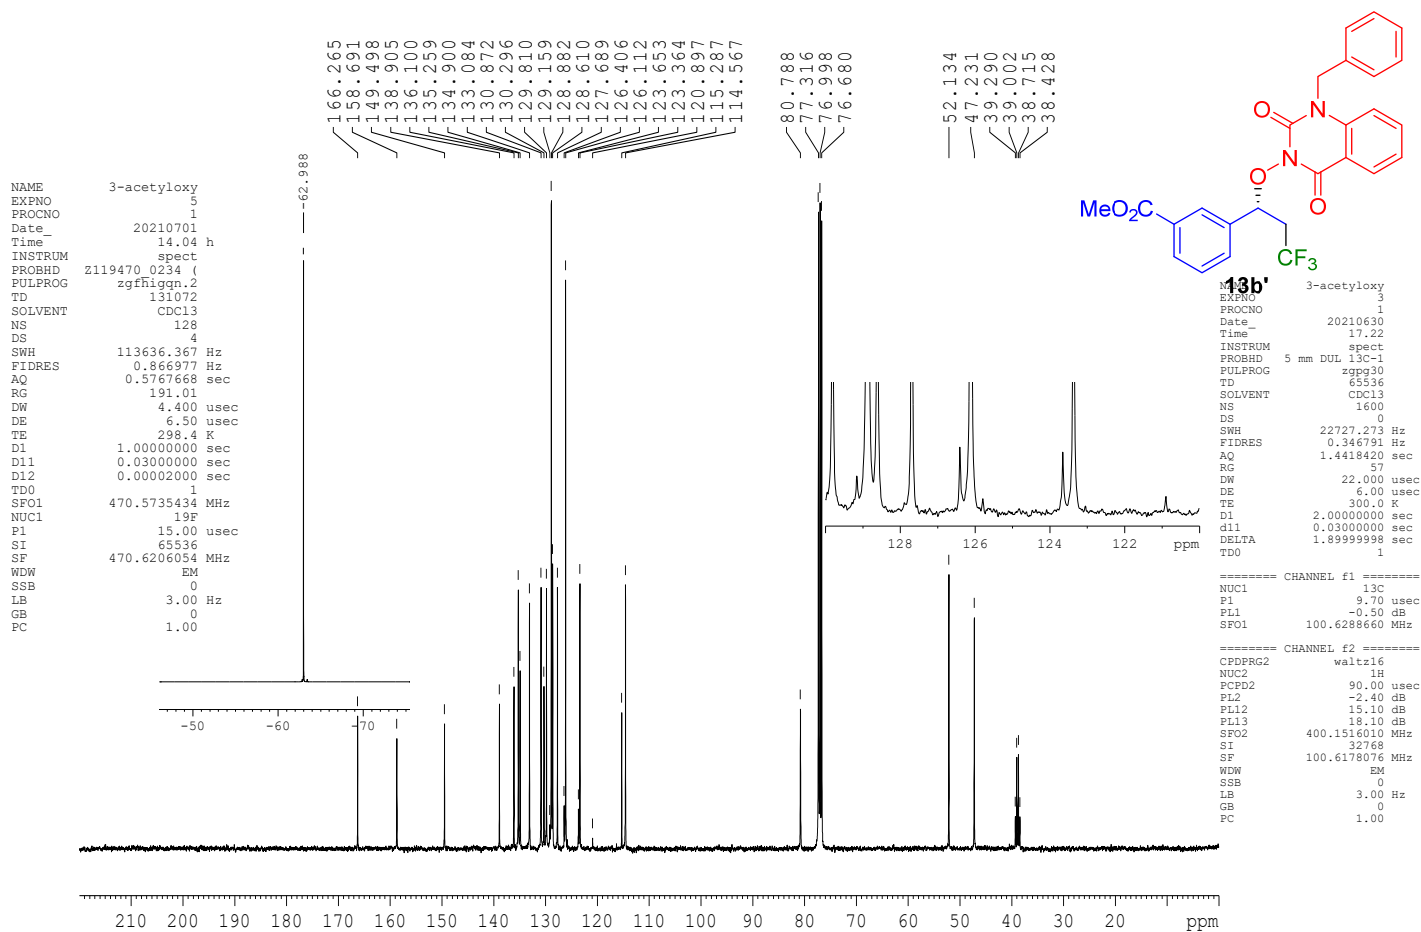

```

NAME      3-acetyloxy
EXPNO     3
PROCNO    1
Date_     20210630
Time      17.22
INSTRUM   spect
PROBHD    5 mm DUL 13C-1
PULPROG   zgpg30
TD         65536
SOLVENT   CDCl3
NS         1600
DS         0
SWH        22727.273 Hz
FIDRES     0.346791 Hz
AQ         1.4418420 sec
RG         37
DW         22.000 usec
DE         6.00 usec
TE         300.0 K
D1         2.00000000 sec
d11        0.03000000 sec
DELTA      1.89999998 sec
TDO        1
----- CHANNEL f1 -----
NUC1       13C
P1         9.70 usec
PL1        -0.50 dB
SFO1       100.6288660 MHz
----- CHANNEL f2 -----
CPDPRG2   waltz16
NUC2       1H
PCPD2      90.00 usec
PL2        -2.40 dB
PL12       15.10 dB
PL13       18.10 dB
SFO2       400.1516010 MHz
SI         32768
SF         100.6178076 MHz
WDW        EM
SSB         0
LB         3.00 Hz
GB         0
PC         1.00

```



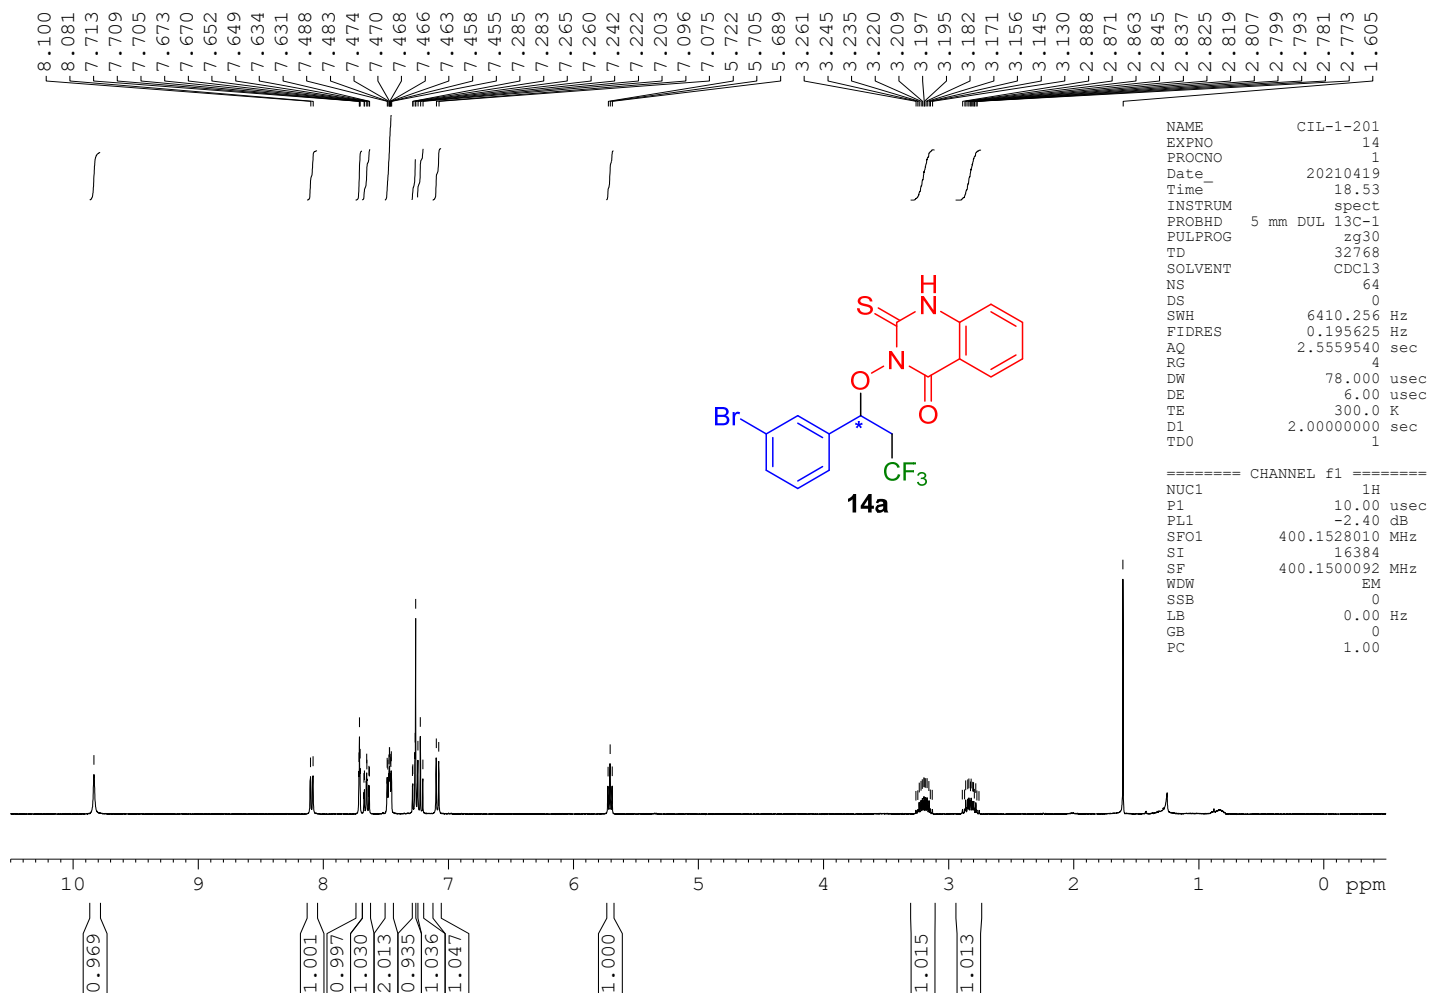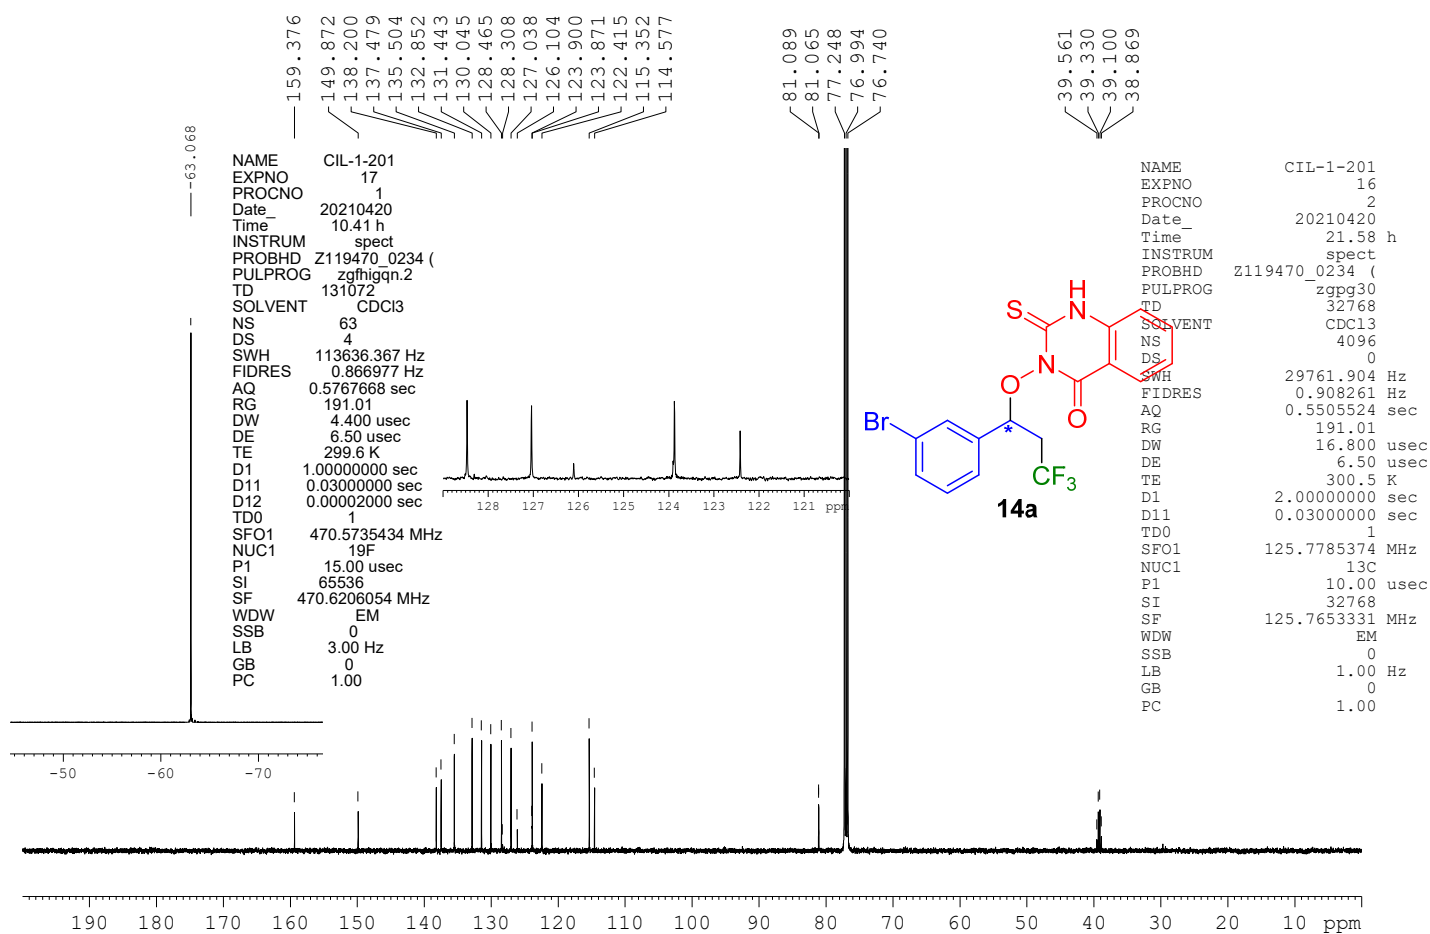

Supplement: s1 [file s1]
